# Supplementary material for: Breast Cancer Cell Secretome Analysis to Decipher miRNA Tumor Biology and Discover Potential Biomarkers
Source: Research Square preprint supplement (doi:10.21203/rs.3.rs-1328838/v1), 2022-02-07
Supplement: Supplementary file 2 [file d0fe503af08cbbb2f028d6a2.pdf]

## **Description of Supplementary Files**

### **File Name: Supplementary Data 1**

**Description:** 1535 secreted Skyline protein IDs with their corresponding gene name (primary),  $\log_2$  fold change, and  $-\log_{10}$  p-values in MCF7-miR526b and miR655 compared to MCF7-Mock cells.

### **File Name: Supplementary Data 2**

**Description:** Significantly enriched GO terms of differently secreted proteins in MCF7-miR526b and MCF7-miR655.

### **File Name: Supplementary Data 3**

**Description:** Differentially secreted MCF7-mi526b and MCF7-miR655 secretory proteins identified by secretome prediction methods.
