# Supplementary material for: Breast Cancer Cell Secretome Analysis to Decipher miRNA Tumor Biology and Discover Potential Biomarkers
Source: Research Square preprint supplement (doi:10.21203/rs.3.rs-1328838/v1), 2022-02-07
Supplement: Supplementary file 5 [file 8df4089ee0d8240b56073f79.xlsx]

## Sheet: HPA
Gene (HPA)	Uniprot		Gene name in threshold	IDs in threshold		Genes in HPA and threshold
A1BG	P04217		ATP5F1A	K7EJP1		HPA
A2M	P01023			K7EK77		FN1
A2ML1	A8K2U0			K7ENJ4		SFN
AADACL2	Q6P093			K7EQH4
ABHD15	Q6UXT9			K7ERX7
ABI3BP	Q7Z7G0			P25705
ABO				P25705-2
AC008687.1			CNN2	A0A087X271
AC233755.1	P0DP08			B4DDF4
ACAN				B4DUT8
ACE	P12821			H3BVI6
ACE2	Q9BYF1			K7ES69
ACP7	Q6ZNF0			Q99439
ACPP	P15309			Q99439-2
ACR	P10323		EWSR1	A0A0D9SFL3
ADA2	Q9NZK5			B0QYK0
ADAM12	O43184			C9JGE3
ADAM28	Q9UKQ2			H7BY36
ADAM9	Q13443			Q01844
ADAMDEC1	O15204			Q01844-2
ADAMTS1	Q9UHI8			Q01844-3
ADAMTS10	Q9H324			Q01844-5
ADAMTS12	P58397			Q01844-6
ADAMTS13	Q76LX8		FN1	H0Y4K8
ADAMTS14	Q8WXS8			H0Y7Z1
ADAMTS15	Q8TE58			P02751
ADAMTS16	Q8TE57			P02751-10
ADAMTS17	Q8TE56			P02751-11
ADAMTS18	Q8TE60			P02751-12
ADAMTS19	Q8TE59			P02751-13
ADAMTS2	O95450			P02751-14
ADAMTS20	P59510			P02751-15
ADAMTS3	O15072			P02751-17
ADAMTS4	O75173			P02751-3
ADAMTS5	Q9UNA0			P02751-4
ADAMTS6	Q9UKP5			P02751-5
ADAMTS7	Q9UKP4			P02751-6
ADAMTS8	Q9UP79			P02751-7
ADAMTS9	Q9P2N4			P02751-8
ADAMTSL1	Q8N6G6			P02751-9
ADAMTSL2	Q86TH1		H2AC11; H2AC13; H2AC15; H2AC16; H2AC17	P0C0S8
ADAMTSL3	P82987		H2AC20	Q16777
ADAMTSL4	Q6UY14		H2AC4; H2AC8	P04908
ADAMTSL5			H2AC6	Q93077
ADCK1	Q86TW2		H2AC7	P20671
ADCYAP1	P18509		H2AJ	H0YFX9
ADGRB1	O14514			Q9BTM1
ADGRE3	Q9BY15			Q9BTM1-2
ADGRE5	P48960		H2AW	Q7L7L0
ADGRF1	Q5T601		H2AX	P16104
ADGRG1	Q9Y653		H2AZ2	C9J0D1
ADIPOQ	Q15848			C9J386
ADM	P35318			Q71UI9
ADM2	Q7Z4H4			Q71UI9-2
ADM5	C9JUS6			Q71UI9-3
AEBP1	Q8IUX7			Q71UI9-4
AFM	P43652			Q71UI9-5
AFP	P02771		KRT8	F8VP67
AGER	Q15109			F8VUG2
AGGF1	Q8N302			F8W1U3
AGRN	O00468			P05787
AGRP	O00253			P05787-2
AGT	P01019		LSM3	P62310
AHSG	P02765		MYL6B	F8W1I5
AIMP1	Q12904			P14649
AKR1B10	O60218		NUCKS1	Q9H1E3
ALB	P02768			Q9H1E3-2
ALKAL1	Q6UXT8		PEA15	B1AKZ5
ALKAL2	Q6UX46			Q15121
AMBN	Q9NP70			Q15121-2
AMBP	P02760		PRDX4	H7C3T4
AMELX	Q99217			Q13162
AMELY	Q99218		PSMB6	P28072
AMH	P03971		RPS15	A0A0B4J2B4
AMTN	Q6UX39			K7EJ78
AMY1A	P04745			K7ELC2
AMY1B	P04745			K7EM56
AMY1C	P04745			K7EQJ5
AMY2A	P04746			P62841
AMY2B	P19961			S4R417
ANG	P03950			S4R456
ANGPT1	Q15389		SEPTIN11	D6RDU5
ANGPT2	O15123			D6RER5
ANGPT4	Q9Y264			D6RGI3
ANGPTL1	O95841			Q9NVA2
ANGPTL2	Q9UKU9			Q9NVA2-2
ANGPTL3	Q9Y5C1		SEPTIN6	B1AMS2
ANGPTL4	Q9BY76			Q14141
ANGPTL5	Q86XS5			Q14141-2
ANGPTL6	Q8NI99			Q14141-3
ANGPTL7	O43827			Q14141-4
ANGPTL8	Q6UXH0		SEPTIN7	A0A0U1RRE1
ANKDD1A	Q495B1			A0A0U1RRH9
ANOS1	P23352			E7EPK1
ANXA1	P04083			E7ES33
ANXA2	P07355			G3V1Q4
AOAH	P28039			Q16181
AOC1	P19801			Q16181-2
AOC3	Q16853		SEPTIN8	A0A087X142
AP000790.4				A6NFQ9
AP002347.1				A6NMH6
APCS	P02743			C9JV02
APELA	P0DMC3			F8W8I8
APLN	Q9ULZ1			Q92599
APOA1	P02647			Q92599-2
APOA2	P02652			Q92599-3
APOA4	P06727			Q92599-4
APOA5	Q6Q788		SFN	P31947
APOB	P04114			P31947-2
APOC1	P02654		SPTAN1	A0A0D9SF54
APOC2	P02655			A0A0D9SGF6
APOC3	P02656			Q13813
APOC4	P55056			Q13813-2
APOD	P05090			Q13813-3
APOE	P02649		SRSF2	J3KP15
APOF	Q13790			J3QL05
APOH	P02749			Q01130
APOL1	O14791			Q01130-2
APOL4	Q9BPW4		TXN	P10599
APOM	O95445			P10599-2
APOO	Q9BUR5		TXNDC12	O95881
ARSF	P54793		YWHAB	A0A0J9YWE8
ARSI	Q5FYB1			A0A0J9YWZ2
ARSJ	Q5FYB0			P31946
ARSK	Q6UWY0			P31946-2
ART4	Q93070			Q4VY19
ART5	Q96L15			Q4VY20
ARTN	Q5T4W7		YWHAG	P61981
ASIP	P42127		YWHAH	A2IDB2
ASPN	Q9BXN1			Q04917
ASTL	Q6HA08
ATRN	O75882
AVP	P01185
AZGP1	P25311
AZU1	P20160
B3GAT1	Q9P2W7
BCAN	Q96GW7
BCHE	P06276
BDNF	P23560
BGLAP	P02818
BGN	P21810
BMP1	P13497
BMP10	O95393
BMP15	O95972
BMP2	P12643
BMP3	P12645
BMP4	P12644
BMP5	P22003
BMP6	P22004
BMP7	P18075
BMP8A	Q7Z5Y6
BMP8B	P34820
BMPER	Q8N8U9
BPI	P17213
BPIFA1	Q9NP55
BPIFA2	Q96DR5
BPIFA3	Q9BQP9
BPIFB1	Q8TDL5
BPIFB4	P59827
BPIFC	Q8NFQ6
BRINP2	Q9C0B6
BRINP3	Q76B58
BSPH1	Q075Z2
BTBD17	A6NE02
BTC	P35070
BTD	P43251
BTN1A1	Q13410
BX248415.1
C10orf95
C10orf99	Q6UWK7
C11orf45	Q8TAV5
C11orf94	C9JXX5
C12orf49	Q9H741
C12orf73	Q69YU5
C14orf93	Q9H972
C15orf61	A6NNL5
C16orf89	Q6UX73
C17orf67	Q0P5P2
C17orf99	Q6UX52
C18orf54	Q8IYD9
C1orf54	Q8WWF1
C1orf56	Q9BUN1
C1QA	P02745
C1QB	P02746
C1QC	P02747
C1QL1	O75973
C1QL2	Q7Z5L3
C1QL3	Q5VWW1
C1QL4	Q86Z23
C1QTNF1	Q9BXJ1
C1QTNF12	Q5T7M4
C1QTNF2	Q9BXJ5
C1QTNF3	Q9BXJ4
C1QTNF4	Q9BXJ3
C1QTNF5	Q9BXJ0
C1QTNF6	Q9BXI9
C1QTNF7	Q9BXJ2
C1QTNF8	P60827
C1QTNF9	P0C862
C1QTNF9B	B2RNN3
C1R	P00736
C1RL	Q9NZP8
C1S	P09871
C2	P06681
C21orf62	Q9NYP8
C22orf15	Q8WYQ4
C22orf46	C9J442
C2orf40	Q9H1Z8
C2orf66	Q6UXQ4
C2orf69	Q8N8R5
C3	P01024
C3orf33	Q6P1S2
C3orf58	Q8NDZ4
C4A	P0C0L4
C4B	P0C0L5
C4BPA	P04003
C4BPB	P20851
C4orf48	Q5BLP8
C5	P01031
C5orf38	Q86SI9
C5orf46	Q6UWT4
C6	P13671
C6orf120	Q7Z4R8
C6orf15	Q6UXA7
C6orf58	Q6P5S2
C7	P10643
C8A	P07357
C8B	P07358
C8G	P07360
C9	P02748
C9orf47	Q6ZRZ4
C9orf72	Q96LT7
CA10	Q9NS85
CA11	O75493
CA6	P23280
CALCA	P01258, P06881
CALCB	P10092
CAMP
CARTPT	Q16568
CATSPERG	Q6ZRH7
CBLN1	P23435
CBLN2	Q8IUK8
CBLN3	Q6UW01
CBLN4	Q9NTU7
CCBE1	Q6UXH8
CCDC112	Q8NEF3
CCDC126	Q96EE4
CCDC134	Q9H6E4
CCDC3	Q9BQI4
CCDC70	Q6NSX1
CCDC80	Q76M96
CCER2	I3L3R5
CCK	P06307
CCL1	P22362
CCL11	P51671
CCL13	Q99616
CCL14	Q16627
CCL15	Q16663
CCL16	O15467
CCL17	Q92583
CCL18	P55774
CCL19	Q99731
CCL2	P13500
CCL20	P78556
CCL21	O00585
CCL22	O00626
CCL23	P55773
CCL24	O00175
CCL25	O15444
CCL26	Q9Y258
CCL27	Q9Y4X3
CCL28	Q9NRJ3
CCL3	P10147
CCL3L1	P16619
CCL4	P13236
CCL4L2	Q8NHW4
CCL5	P13501
CCL7	P80098
CCL8	P80075
CD14	P08571
CD163	Q86VB7
CD40	P25942
CD40LG	P29965
CD44	P16070
CD55	P08174
CD5L	O43866
CD6	P30203
CDCP2	Q5VXM1
CDNF	Q49AH0
CDSN
CEACAM16	Q2WEN9
CEL
CELA1	Q9UNI1
CELA2A	P08217
CELA2B	P08218
CELA3A	P09093
CELA3B	P08861
CEMIP	Q8WUJ3
CER1	O95813
CES4A	Q5XG92
CES5A	Q6NT32
CETP	P11597
CFB	P00751
CFC1	P0CG37
CFC1B	P0CG36
CFD	P00746
CFH	P08603
CFHR1	Q03591
CFHR2	P36980
CFHR3	Q02985
CFHR4	Q92496
CFHR5	Q9BXR6
CFI	P05156
CFP	P27918
CGA	P01215
CGB1	A6NKQ9
CGB2
CGB3	P0DN86
CGB5	P0DN86
CGB7	P0DN87
CGB8	P0DN86
CGREF1	Q99674
CHAD	O15335
CHADL	Q6NUI6
CHI3L1	P36222
CHI3L2	Q15782
CHIT1	Q13231
CHRD	Q9H2X0
CHRDL1	Q9BU40
CHRDL2	Q6WN34
CHSY1	Q86X52
CILP	O75339
CILP2	Q8IUL8
CKLF	Q9UBR5
CLCA1	A8K7I4
CLCF1	Q9UBD9
CLEC11A	Q9Y240
CLEC18A	A5D8T8
CLEC18B	Q6UXF7
CLEC18C	Q8NCF0
CLEC19A	Q6UXS0
CLEC3A
CLEC3B	P05452
CLPS	P04118
CLPSL1	A2RUU4
CLPSL2	Q6UWE3
CLU	P10909
CLUL1	Q15846
CMA1	P23946
CNBD1	Q8NA66
CNDP1	Q96KN2
CNMD	O75829
CNTN2	Q02246
COCH	O43405
COL10A1	Q03692
COL11A1	P12107
COL11A2	P13942
COL12A1	Q99715
COL14A1	Q05707
COL15A1	P39059
COL16A1	Q07092
COL17A1	Q9UMD9
COL18A1	P39060
COL19A1	Q14993
COL1A1	P02452
COL1A2	P08123
COL20A1	Q9P218
COL21A1	Q96P44
COL22A1	Q8NFW1
COL24A1	Q17RW2
COL26A1	Q96A83
COL27A1	Q8IZC6
COL28A1	Q2UY09
COL2A1	P02458
COL3A1	P02461
COL4A1	P02462
COL4A2	P08572
COL4A3	Q01955
COL4A4	P53420
COL4A5	P29400
COL4A6	Q14031
COL5A1	P20908
COL5A2	P05997
COL5A3	P25940
COL6A1	P12109
COL6A2	P12110
COL6A3	P12111
COL6A5
COL6A6	A6NMZ7
COL7A1	Q02388
COL8A1	P27658
COL8A2	P25067
COL9A1	P20849
COL9A2	Q14055
COL9A3	Q14050
COLEC10	Q9Y6Z7
COLEC11	Q9BWP8
COLQ	Q9Y215
COMP	P49747
COPA	P53621
CORT	O00230
CP	P00450
CPA1	P15085
CPA2	P48052
CPA3	P15088
CPA4	Q9UI42
CPA5	Q8WXQ8
CPA6	Q8N4T0
CPAMD8	Q8IZJ3
CPB1	P15086
CPB2	Q96IY4
CPN1	P15169
CPN2	P22792
CPQ	Q9Y646
CPXM1	Q96SM3
CPXM2	Q8N436
CPZ	Q66K79
CREG1	O75629
CREG2	Q8IUH2
CRELD2	Q6UXH1
CRH	P06850
CRHBP	P24387
CRHR2	Q13324
CRISP1	P54107
CRISP2	P16562
CRISP3	P54108
CRISPLD1	Q9H336
CRISPLD2	Q9H0B8
CRLF1	O75462
CRP	P02741
CRTAC1	Q9NQ79
CRTAP	O75718
CSF1	P09603
CSF2	P04141
CSF2RA	P15509
CSF3	P09919
CSH1	P0DML2
CSH2	P0DML3
CSHL1	Q14406
CSN1S1	P47710
CSN2	P05814
CSN3	P07498
CST1	P01037
CST11	Q9H112
CST2	P09228
CST3	P01034
CST4	P01036
CST5	P28325
CST6	Q15828
CST7	O76096
CST8	O60676
CST9	Q5W186
CST9L	Q9H4G1
CSTL1	Q9H114
CT55	Q8WUE5
CTF1	Q16619
CTGF	P29279
CTHRC1	Q96CG8
CTRB1	P17538
CTRB2	Q6GPI1
CTRC	Q99895
CTRL	P40313
CTSB	P07858
CTSD	P07339
CTSW	P56202
CUTA	O60888
CX3CL1	P78423
CXCL1	P09341
CXCL10	P02778
CXCL11	O14625
CXCL12	P48061
CXCL13	O43927
CXCL14	O95715
CXCL16	Q9H2A7
CXCL17	Q6UXB2
CXCL2	P19875
CXCL3	P19876
CXCL5	P42830
CXCL6	P80162
CXCL8	P10145
CXCL9	Q07325
CXorf36	Q9H7Y0
CYB5D2	Q8WUJ1
CYR61	O00622
CYTL1	Q9NRR1
DAND5	Q8N907
DCD	P81605
DCN	P07585
DEFA4	P12838
DEFA5	Q01523
DEFA6	Q01524
DEFB1	P60022
DEFB103A	P81534
DEFB103B	P81534
DEFB104A	Q8WTQ1
DEFB104B	Q8WTQ1
DEFB105A	Q8NG35
DEFB105B	Q8NG35
DEFB106A	Q8N104
DEFB106B	Q8N104
DEFB107A	Q8IZN7
DEFB107B	Q8IZN7
DEFB108B	Q8NET1
DEFB110	Q30KQ9
DEFB112	Q30KQ8
DEFB113	Q30KQ7
DEFB114	Q30KQ6
DEFB115	Q30KQ5
DEFB116	Q30KQ4
DEFB118	Q96PH6
DEFB119	Q8N690
DEFB121	Q5J5C9
DEFB123	Q8N688
DEFB124	Q8NES8
DEFB125	Q8N687
DEFB126	Q9BYW3
DEFB127	Q9H1M4
DEFB128	Q7Z7B8
DEFB129	Q9H1M3
DEFB130A	P0DP74
DEFB130B	P0DP73
DEFB131A	P59861
DEFB131B	A0A096LNP1
DEFB132	Q7Z7B7
DEFB133	Q30KQ1
DEFB134	Q4QY38
DEFB135	Q30KP9
DEFB136	Q30KP8
DEFB4A	O15263
DEFB4B	O15263
DHH	O43323
DHRS13	Q6UX07
DHRS4L2	Q6PKH6
DHRS7C	A6NNS2
DHRSX	Q8N5I4
DKK1	O94907
DKK2	Q9UBU2
DKK3	Q9UBP4
DKK4	Q9UBT3
DKKL1	Q9UK85
DMBT1	Q9UGM3
DMKN	Q6E0U4
DMP1	Q13316
DNASE1	P24855
DNASE1L2	Q92874
DNASE1L3	Q13609
DPP4	P27487
DPT	Q07507
DRAXIN	Q8NBI3
DSPP	Q9NZW4
EBI3	Q14213
ECM1	Q16610
ECM2	O94769
EDDM3A	Q14507
EDDM3B	P56851
EDIL3	O43854
EDN1	P05305
EDN2	P20800
EDN3	P14138
EFEMP1	Q12805
EFEMP2	O95967
EFNA1	P20827
EFNA4	P52798
EGFL6	Q8IUX8
EGFL7	Q9UHF1
EGFL8	Q99944
EGFLAM	Q63HQ2
EGFR	P00533
ELANE	P08246
ELN	P15502
ELSPBP1	Q96BH3
EMC10	Q5UCC4
EMID1	Q96A84
EMILIN1	Q9Y6C2
EMILIN2	Q9BXX0
EMILIN3	Q9NT22
ENAM	Q9NRM1
ENDOD1	O94919
ENDOU	P21128
ENHO	Q6UWT2
ENPP1	P22413
ENPP3	O14638
ENTPD5	O75356
ENTPD6	O75354
EPGN	Q6UW88
EPO	P01588
EPPIN	O95925
EPPIN-WFDC6	O95925
EPYC	Q99645
ERAP1	Q9NZ08
ERAP2	Q6P179
ERBB3	P21860
EREG	O14944
ERFE	Q4G0M1
ERVMER34-1	Q9H9K5
ESM1	Q9NQ30
EYS	Q5T1H1
F10	P00742
F11	P03951
F12	P00748
F13A1	P00488
F13B	P05160
F2	P00734
F3	P13726
F5	P12259
F7	P08709
F8	P00451
F9	P00740
FAM131A	Q6UXB0
FAM172A	Q8WUF8
FAM177A1	Q8N128
FAM180A	Q6UWF9
FAM198A	Q9UFP1
FAM19A1	Q7Z5A9
FAM19A3	Q7Z5A8
FAM19A4	Q96LR4
FAM19A5	Q7Z5A7
FAM20A	Q96MK3
FAM20C	Q8IXL6
FAM24A	A6NFZ4
FAM3A	P98173
FAM3B	P58499
FAM3C	Q92520
FAM3D	Q96BQ1
FAM46B	Q96A09
FAP	Q12884
FAS	P25445
FASLG	P48023
FBLN1	P23142
FBLN2	P98095
FBLN5	Q9UBX5
FBLN7	Q53RD9
FBN1	P35555
FBN2	P35556
FBN3	Q75N90
FCER2	P06734
FCGR3A	P08637
FCGR3B	O75015
FCMR	O60667
FCN1	O00602
FCN2	Q15485
FCN3	O75636
FCRL5	Q96RD9
FDCSP	Q8NFU4
FETUB	Q9UGM5
FGA	P02671
FGB	P02675
FGF1	P05230
FGF10	O15520
FGF16	O43320
FGF17	O60258
FGF18	O76093
FGF19	O95750
FGF2	P09038
FGF20	Q9NP95
FGF21	Q9NSA1
FGF22	Q9HCT0
FGF23	Q9GZV9
FGF3	P11487
FGF4	P08620
FGF5	P12034
FGF6	P10767
FGF7	P21781
FGF8	P55075
FGF9	P31371
FGFBP1	Q14512
FGFBP2	Q9BYJ0
FGFBP3	Q8TAT2
FGFR2	P21802
FGG	P02679
FGL1	Q08830
FGL2	Q14314
FLT1	P17948
FLT4	P35916
FMOD	Q06828
FN1	P02751
FNDC1	Q4ZHG4
FNDC7	Q5VTL7
FOLR1	P15328
FOLR2	P14207
FOLR3	P41439
FREM1	Q5H8C1
FREM3	P0C091
FRZB	Q92765
FSHB	P01225
FST	P19883
FSTL1	Q12841
FSTL3	O95633
FSTL4	Q6MZW2
FSTL5	Q8N475
FTCDNL1	E5RQL4
FUCA2	Q9BTY2
GAL	P22466
GALP	Q9UBC7
GAS6	Q14393
GAST	P01350
GATD1	Q8NB37
GC	P02774
GCG	P01275
GDF1	P27539
GDF10	P55107
GDF11	O95390
GDF15	Q99988
GDF2	Q9UK05
GDF3	Q9NR23
GDF5	P43026
GDF6	Q6KF10
GDF7	Q7Z4P5
GDF9	O60383
GDNF	P39905
GFOD1	Q9NXC2
GFOD2	Q3B7J2
GH1	P01241
GH2	P01242
GHR	P10912
GHRH	P01286
GHRL	Q9UBU3
GIF	P27352
GIP	P09681
GKN1	Q9NS71
GKN2	Q86XP6
GLB1L	Q6UWU2
GLB1L2	Q8IW92
GLDN	Q6ZMI3
GLIPR1L1	Q6UWM5
GLT1D1	Q96MS3
GLTPD2	A6NH11
GNLY	P22749
GNRH1	P01148
GNRH2	O43555
GPHA2	Q96T91
GPHB5	Q86YW7
GPI	P06744
GPLD1	P80108
GPX3	P22352
GPX5	O75715
GPX6	P59796
GPX7	Q96SL4
GREM1	O60565
GREM2	Q9H772
GRN	P28799
GRP	P07492
GSN	P06396
GUCA2A	Q02747
GUCA2B	Q16661
GZMA	P12544
GZMB	P10144
GZMH	P20718
GZMK	P49863
GZMM	P51124
HABP2	Q14520
HAMP	P81172
HAPLN1	P10915
HAPLN2	Q9GZV7
HAPLN3	Q96S86
HAPLN4	Q86UW8
HBEGF	Q99075
HCRT	O43612
HGF	P14210
HGFAC	Q04756
HHIP	Q96QV1
HHIPL1	Q96JK4
HHIPL2	Q6UWX4
HHLA1	C9JL84
HLA-G	P17693
HMCN1	Q96RW7
HMCN2	Q8NDA2
HMSD	A8MTL9, P0C7T4
HP	P00738
HPR	P00739
HPSE	Q9Y251
HPSE2	Q8WWQ2
HPX	P02790
HRG	P04196
HSD11B1L	Q7Z5J1
HSPG2	P98160
HTN1	P15515
HTN3	P15516
HTRA1	Q92743
HTRA3	P83110
HTRA4	P83105
HYAL1	Q12794
HYAL3	O43820
IAPP	P10997
IBSP	P21815
IFNA1	P01562
IFNA10	P01566
IFNA13	P01562
IFNA14	P01570
IFNA16	P05015
IFNA17	P01571
IFNA2	P01563
IFNA21	P01568
IFNA4	P05014
IFNA5	P01569
IFNA6	P05013
IFNA7	P01567
IFNA8	P32881
IFNAR2	P48551
IFNB1	P01574
IFNE	Q86WN2
IFNG	P01579
IFNK	Q9P0W0
IFNL1	Q8IU54
IFNL2	Q8IZJ0
IFNL3	Q8IZI9
IFNW1	P05000
IGF1	P05019
IGF2	P01344
IGFALS	P35858
IGFBP1	P08833
IGFBP2	P18065
IGFBP3	P17936
IGFBP4	P22692
IGFBP5	P24593
IGFBP6	P24592
IGFBP7	Q16270
IGFBPL1	Q8WX77
IGFL1	Q6UW32
IGFL2	Q6UWQ7
IGFL3	Q6UXB1
IGFL4	Q6B9Z1
IGIP	A6NJ69
IGLL1	P15814
IGLL5	B9A064
IGLON5	A6NGN9
IGSF10	Q6WRI0
IHH	Q14623
IL10	P22301
IL11	P20809
IL12A	P29459
IL12B	P29460
IL13	P35225
IL15	P40933
IL15RA	Q13261
IL16	Q14005
IL17A	Q16552
IL17B	Q9UHF5
IL17C	Q9P0M4
IL17D	Q8TAD2
IL17F	Q96PD4
IL17RA	Q96F46
IL18	Q14116
IL18BP	O95998
IL19	Q9UHD0
IL1A	P01583
IL1B	P01584
IL1F10	Q8WWZ1
IL1R1	P14778
IL1R2	P27930
IL1RAP	Q9NPH3
IL1RL1	Q01638
IL1RN	P18510
IL2	P60568
IL20	Q9NYY1
IL21	Q9HBE4
IL22	Q9GZX6
IL22RA2	Q969J5
IL23A	Q9NPF7
IL24	Q13007
IL25	Q9H293
IL26	Q9NPH9
IL27	Q8NEV9
IL3	P08700
IL31	Q6EBC2
IL32	P24001
IL33	O95760
IL34	Q6ZMJ4
IL36A	Q9UHA7
IL36B	Q9NZH7
IL36G	Q9NZH8
IL36RN	Q9UBH0
IL37	Q9NZH6
IL4	P05112
IL4I1	Q96RQ9
IL4R	P24394
IL5	P05113
IL6	P05231
IL6ST	P40189
IL7	P13232
IL9	P15248
IMPG1	Q17R60
INHA	P05111
INHBA	P08476
INHBB	P09529
INHBC	P55103
INHBE	P58166
INS	P01308
INS-IGF2	F8WCM5
INSL3	P51460
INSL4	Q14641
INSL5	Q9Y5Q6
INSL6	Q9Y581
ISG15	P05161
ISLR	O14498
ISM1	B1AKI9
ISM2	Q6H9L7
ITGBL1	O95965
ITIH1	P19827
ITIH2	P19823
ITIH3	Q06033
ITIH4	Q14624
ITIH5
ITIH6	Q6UXX5
ITLN1	Q8WWA0
ITLN2	Q8WWU7
IZUMO4	Q1ZYL8
JAM3	Q9BX67
JCHAIN	P01591
KAZALD1	Q96I82
KCP
KERA	O60938
KIAA0100	Q14667
KIAA0319	Q5VV43
KIR3DX1
KISS1	Q15726
KL	Q9UEF7
KLK1	P06870
KLK10	O43240
KLK11	Q9UBX7
KLK12	Q9UKR0
KLK13	Q9UKR3
KLK14	Q9P0G3
KLK15	Q9H2R5
KLK2	P20151
KLK3	P07288
KLK4	Q9Y5K2
KLK5	Q9Y337
KLK6	Q92876
KLK7	P49862
KLK8	O60259
KLK9	Q9UKQ9
KLKB1	P03952
KNG1	P01042
KRTDAP	P60985
LACRT	Q9GZZ8
LAD1	O00515
LAG3	P18627
LAIR2	Q6ISS4
LALBA	P00709
LAMA1	P25391
LAMA2	P24043
LAMA3	Q16787
LAMA4	Q16363
LAMA5	O15230
LAMB1	P07942
LAMB2	P55268
LAMB3	Q13751
LAMB4	A4D0S4
LAMC1	P11047
LAMC2	Q13753
LAMC3	Q9Y6N6
LBP	P18428
LCAT	P04180
LCN1	P31025
LCN10	Q6JVE6
LCN12	Q6JVE5
LCN15	Q6UWW0
LCN2	P80188
LCN6	P62502
LCN8	Q6JVE9
LCN9	Q8WX39
LDLRAD2	Q5SZI1
LEAP2	Q969E1
LECT2	O14960
LEFTY1	O75610
LEFTY2	O00292
LEP	P41159
LEPR	P48357
LGALS1	P09382
LGALS3	P17931
LGALS3BP	Q08380
LGALS9	O00182
LGI1	O95970
LGI2	Q8N0V4
LGI3	Q8N145
LGI4	Q8N135
LHB	P01229
LIF	P15018
LILRA2	Q8N149
LILRA5	A6NI73
LIPC	P11150
LIPF	P07098
LIPG	Q9Y5X9
LIPH	Q8WWY8
LIPI	Q6XZB0
LIPK	Q5VXJ0
LIPM	Q5VYY2
LIPN	Q5VXI9
LOX	P28300
LOXL1	Q08397
LOXL2	Q9Y4K0
LOXL3	P58215
LOXL4	Q96JB6
LPA	P08519
LPL	P06858
LPO	P22079
LRCH3	Q96II8
LRCOL1	A6NCL2
LRG1	P02750
LRP8	Q14114
LRRC17	Q8N6Y2
LTA	P01374
LTBP1	Q14766
LTBP2	Q14767
LTBP3	Q9NS15
LTBP4	Q8N2S1
LTF	P02788
LUM	P51884
LUZP2	Q86TE4
LY6G5B	Q8NDX9
LY6G5C	Q5SRR4
LY6K	Q17RY6
LY86	O95711
LY96	Q9Y6Y9
LYG1	Q8N1E2
LYG2	Q86SG7
LYPD6	Q86Y78
LYPD8	Q6UX82
LYZ	P61626
LYZL1	Q6UWQ5
LYZL2	Q7Z4W2
LYZL4	Q96KX0
LYZL6	O75951
MAMDC2	Q7Z304
MAN2B2	Q9Y2E5
MANF
MASP1	P48740
MASP2	O00187
MATN1	P21941
MATN2	O00339
MATN3	O15232
MATN4	O95460
MBL2	P11226
MDK	P21741
MEGF6	O75095
MEI1	Q5TIA1
MEP1B	Q16820
MEPE	Q9NQ76
MET	P08581
METRN	Q9UJH8
METRNL	Q641Q3
METTL24	Q5JXM2
METTL9	Q9H1A3
MFAP2	P55001
MFAP4	P55083
MFAP5	Q13361
MFGE8	Q08431
MGAT4A	Q9UM21
MGP	P08493
MIA	Q16674
MIF	P14174
MLN	P12872
MMP1	P03956
MMP10	P09238
MMP11	P24347
MMP12	P39900
MMP13	P45452
MMP16	P51512
MMP17	Q9ULZ9
MMP19	Q99542
MMP2	P08253
MMP20	O60882
MMP21	Q8N119
MMP24	Q9Y5R2
MMP25	Q9NPA2
MMP26	Q9NRE1
MMP28	Q9H239
MMP3	P08254
MMP7	P09237
MMP8	P22894
MMP9	P14780
MMRN1	Q13201
MMRN2	Q9H8L6
MSMB	P08118
MSMP	Q1L6U9
MST1
MSTN	O14793
MTRNR2L1	P0CJ68
MTRNR2L10	P0CJ77
MTRNR2L11	S4R3Y5
MTRNR2L12	P0DMP1
MTRNR2L13	S4R3P1
MTRNR2L3	P0CJ70
MTRNR2L4	P0CJ71
MTRNR2L5	P0CJ72
MTRNR2L6	P0CJ73
MTRNR2L7	P0CJ74
MTRNR2L8	P0CJ75
MUC1	P15941
MUC13	Q9H3R2
MUC16	Q8WXI7
MUC20	Q8N307
MUC4	Q99102
MUC5AC	P98088
MUC5B	Q9HC84
MUC6	Q6W4X9
MUC7	Q8TAX7
MUCL1	Q96DR8
MXRA5	Q9NR99
MXRA7	P84157
MYDGF	Q969H8
MYOC	Q99972
MZB1	Q8WU39
NAMPT	P43490
NAPSA	O96009
NAXE	Q8NCW5
NBL1	P41271
NCAN	O14594
NDNF	Q8TB73
NDP	Q00604
NECTIN1	Q15223
NECTIN4	Q96NY8
NELL1	Q92832
NELL2	Q99435
NENF	Q9UMX5
NGF	P01138
NHLRC3	Q5JS37
NID1	P14543
NID2	Q14112
NMB	P08949
NMS	Q5H8A3
NMU	P48645
NODAL	Q96S42
NOG	Q13253
NOTCH2NL	Q7Z3S9
NOTUM	Q6P988
NOV	P48745
NPB	Q8NG41
NPC2	P61916
NPFF	O15130
NPNT	Q6UXI9
NPPA	P01160
NPPB	P16860
NPPC	P23582
NPS	P0C0P6
NPTX1	Q15818
NPTX2	P47972
NPVF	Q9HCQ7
NPW	Q8N729
NPY	P01303
NRG1	Q02297
NRG2	O14511
NRG3	P56975
NRG4	Q8WWG1
NRN1L	Q496H8
NRP1	O14786
NRP2	O60462
NRTN	Q99748
NT5DC3	Q86UY8
NTF3	P20783
NTF4	P34130
NTN1	O95631
NTN3	O00634
NTN4	Q9HB63
NTN5	Q8WTR8
NTS	P30990
NUCB1	Q02818
NUCB2
NXPE3	Q969Y0
NXPE4	Q6UWF7
NXPH1	P58417
NXPH2	O95156
NXPH3	O95157
NXPH4	O95158
OAF	Q86UD1
OBP2A	Q9NY56
OBP2B	Q9NPH6
OC90	Q02509
ODAPH	Q17RF5
OGN	P20774
OIT3	Q8WWZ8
OLFM1	Q99784
OLFM2	O95897
OLFM3	Q96PB7
OLFM4	Q6UX06
OLFML1	Q6UWY5
OLFML2A	Q68BL7
OLFML2B	Q68BL8
OLFML3	Q9NRN5
OMD	Q99983
OOSP2	Q86WS3
OPRPN	Q99935
OPTC	Q9UBM4
ORM1	P02763
ORM2	P19652
OSM	P13725
OSTN	P61366
OTOA	Q7RTW8
OTOG	Q6ZRI0
OTOL1	A6NHN0
OTOR	Q9NRC9
OTOS	Q8NHW6
OVCH1	Q7RTY7
OVCH2
OXT	P01178
P4HB	P07237
PAEP	P09466
PAM	P19021
PAMR1	Q6UXH9
PAPLN	O95428
PAPPA	Q13219
PAPPA2	Q9BXP8
PATE1	Q8WXA2
PATE2	Q6UY27
PATE3	B3GLJ2
PATE4	P0C8F1
PCDH12	Q9NPG4
PCDHA1	Q9Y5I3
PCDHA10	Q9Y5I2
PCOLCE	Q15113
PCOLCE2	Q9UKZ9
PCSK1	P29120
PCSK1N	Q9UHG2
PCSK2	P16519
PCSK5	Q92824
PCSK6	P29122
PCSK9	Q8NBP7
PCYOX1L	Q8NBM8
PDCD1LG2	Q9BQ51
PDGFA	P04085
PDGFB	P01127
PDGFC	Q9NRA1
PDGFD	Q9GZP0
PDGFRL	Q15198
PDYN	P01213
PEBP4	Q96S96
PENK	P01210
PF4	P02776
PF4V1	P10720
PGA3	P0DJD8
PGA4	P0DJD7
PGA5	P0DJD9
PGC	P20142
PGF	P49763
PGLYRP1	O75594
PGLYRP2	Q96PD5
PGLYRP3	Q96LB9
PGLYRP4	Q96LB8
PI15	O43692
PI16	Q6UXB8
PI3	P19957
PIBF1	Q8WXW3
PILRA	Q9UKJ1
PINLYP	A6NC86
PIP	P12273
PKDCC	Q504Y2
PLA1A	Q53H76
PLA2G10	O15496
PLA2G12A	Q9BZM1
PLA2G12B	Q9BX93
PLA2G1B	P04054
PLA2G2A	P14555
PLA2G2C	Q5R387
PLA2G2D	Q9UNK4
PLA2G2E	Q9NZK7
PLA2G3	Q9NZ20
PLA2G5	P39877
PLA2G7	Q13093
PLA2R1	Q13018
PLAC1	Q9HBJ0
PLAC9	Q5JTB6
PLAT	P00750
PLAU	P00749
PLG	P00747
PLGLB1	Q02325
PLGLB2	Q02325
PLOD3	O60568
PLTP	P55058
PM20D1	Q6GTS8
PMCH	P20382
PNLIP	P16233
PNLIPRP1	P54315
PNLIPRP3	Q17RR3
PNOC	Q13519
PODN	Q7Z5L7
PODNL1	Q6PEZ8
POMC	P01189
PON1	P27169
PON2	Q15165
PON3	Q15166
POSTN	Q15063
PPBP	P02775
PPIA	P62937
PPIB	P23284
PPY	P01298
PRADC1	Q9BSG0
PRAP1	Q96NZ9
PRB1
PRB2	P02812
PRB3	Q04118
PRB4
PRELP	P51888
PRG3	Q9Y2Y8
PRG4	Q92954
PRH2	P02810
PRL	P01236
PRLH	P81277
PROC	P04070
PROK1	P58294
PROK2	Q9HC23
PROS1	P07225
PROZ	P22891
PRR27	Q6MZM9
PRR4	Q16378
PRSS1	P07477
PRSS12	P56730
PRSS16	Q9NQE7
PRSS2	P07478
PRSS22	Q9GZN4
PRSS23	O95084
PRSS27	Q9BQR3
PRSS3	P35030
PRSS33	Q8NF86
PRSS35	Q8N3Z0
PRSS36	Q5K4E3
PRSS37	A4D1T9
PRSS38	A1L453
PRSS42	Q7Z5A4
PRSS48	Q7RTY5
PRSS51	A0A1B0GVH4
PRSS53	Q2L4Q9
PRSS54	Q6PEW0
PRSS57	Q6UWY2
PRSS58	Q8IYP2
PRSS8	Q16651
PRTN3	P24158
PSAPL1	Q6NUJ1
PSG1	P11464
PSG11	Q9UQ72
PSG2	P11465
PSG3	Q16557
PSG4	Q00888
PSG5	Q15238
PSG6	Q00889
PSG7
PSG8	Q9UQ74
PSG9	Q00887
PSORS1C2	Q9UIG4
PSPN	O60542
PTEN	P60484
PTGDS	P41222
PTH	P01270
PTH2	Q96A98
PTHLH	P12272
PTK7	Q13308
PTN	P21246
PTPRS	Q13332
PTPRZ1	P23471
PTX3	P26022
PTX4	Q96A99
PVR	P15151
PXDN	Q92626
PYY	P10082
PZP	P20742
QPCT	Q16769
QRFP	P83859
QSOX1	O00391
R3HDML	Q9H3Y0
RAET1G	Q6H3X3
RARRES2	Q99969
RBP3	P10745
RBP4	P02753
REG1A	P05451
REG1B	P48304
REG3A	Q06141
REG3G	Q6UW15
REG4	Q9BYZ8
RELN	P78509
REN	P00797
RETN	Q9HD89
RETNLB	Q9BQ08
RGMA	Q96B86
RLN1	P04808
RLN2	P04090
RLN3	Q8WXF3
RNASE1	P07998
RNASE10	Q5GAN6
RNASE11	Q8TAA1
RNASE12	Q5GAN4
RNASE13	Q5GAN3
RNASE2	P10153
RNASE3	P12724
RNASE4	P34096
RNASE6	Q93091
RNASE7	Q9H1E1
RNASE8	Q8TDE3
RNASE9	P60153
RNASET2	O00584
RNLS	Q5VYX0
RNPEP	Q9H4A4
RPTN	Q6XPR3
RS1	O15537
RSPO1	Q2MKA7
RSPO2	Q6UXX9
RSPO3	Q9BXY4
RSPO4	Q2I0M5
RSPRY1	Q96DX4
RTBDN	Q9BSG5
S100A12	P80511
S100A13	Q99584
S100A7	P31151
S100A8	P05109
S100A9	P06702
SAA1	P0DJI8
SAA2	P0DJI9
SAA4	P35542
SBSN	Q6UWP8
SBSPON	Q8IVN8
SCG2	P13521
SCG3	Q8WXD2
SCG5	P05408
SCGB1A1	P11684
SCGB1C1	Q8TD33
SCGB1C2	P0DMR2
SCGB1D1	O95968
SCGB1D2	O95969
SCGB1D4	Q6XE38
SCGB2A1	O75556
SCGB2A2	Q13296
SCGB2B2	Q4G0G5
SCGB3A1	Q96QR1
SCGB3A2	Q96PL1
SCPEP1	Q9HB40
SCRG1	O75711
SCT	P09683
SCUBE1	Q8IWY4
SCUBE2	Q9NQ36
SCUBE3	Q8IX30
SDC1	P18827
SDC4	P31431
SECTM1	Q8WVN6
SELENOP	P49908
SEMA3A	Q14563
SEMA3B	Q13214
SEMA3C	Q99985
SEMA3D	O95025
SEMA3E	O15041
SEMA3F	Q13275
SEMA3G	Q9NS98
SEMG1	P04279
SEMG2	Q02383
SERPINA1	P01009
SERPINA10	Q9UK55
SERPINA11	Q86U17
SERPINA12	Q8IW75
SERPINA3	P01011
SERPINA4	P29622
SERPINA5	P05154
SERPINA6	P08185
SERPINA7	P05543
SERPINA9	Q86WD7
SERPINC1	P01008
SERPIND1	P05546
SERPINE1	P05121
SERPINE2	P07093
SERPINE3	A8MV23
SERPINF1	P36955
SERPINF2	P08697
SERPING1	P05155
SERPINI1	Q99574
SERPINI2	O75830
SFN	P31947
SFRP1	Q8N474
SFRP2	Q96HF1
SFRP4	Q6FHJ7
SFRP5	Q5T4F7
SFTA2	Q6UW10
SFTA3	P0C7M3
SFTPA1	Q8IWL2
SFTPA2	Q8IWL1
SFTPB	P07988
SFTPC	P11686
SFTPD	P35247
SHBG	P04278
SHE	Q5VZ18
SIRPD	Q9H106
SLAMF1	Q13291
SLIT1	O75093
SLIT2	O94813
SLIT3	O75094
SLITRK1	Q96PX8
SLPI	P03973
SLURP1	P55000
SLURP2	P0DP57
SMIM31
SMOC1	Q9H4F8
SMOC2	Q9H3U7
SMPD1	P17405
SMPDL3A	Q92484
SMPDL3B	Q92485
SMR3A	Q99954
SMR3B	P02814
SNED1	Q8TER0
SOD3	P08294
SOGA1	O94964
SORL1	Q92673
SOST	Q9BQB4
SOSTDC1	Q6X4U4
SPACA3	Q8IXA5
SPACA5	Q96QH8
SPACA5B	Q96QH8
SPACA7	Q96KW9
SPAG11A	Q6PDA7
SPAG11B	Q08648
SPARC	P09486
SPARCL1	Q14515
SPATA20	Q8TB22
SPINK1	P00995
SPINK13	Q1W4C9
SPINK14	Q6IE38
SPINK2	P20155
SPINK4	O60575
SPINK5	Q9NQ38
SPINK6	Q6UWN8
SPINK7	P58062
SPINK8	P0C7L1
SPINK9	Q5DT21
SPINT1	O43278
SPINT3	P49223
SPINT4	Q6UDR6
SPOCK1	Q08629
SPOCK2	Q92563
SPOCK3	Q9BQ16
SPON1	Q9HCB6
SPON2	Q9BUD6
SPP1	P10451
SPP2	Q13103
SPTY2D1OS
SPX	Q9BT56
SRPX	P78539
SRPX2	O60687
SSC4D	Q8WTU2
SSC5D	A1L4H1
SSPO
SST	P61278
ST6GAL1	P15907
STATH	P02808
STC1	P52823
STC2	O76061
SVBP	Q8N300
TAC1	P20366
TAC3	Q9UHF0
TAC4	Q86UU9
TBL2	Q9Y4P3
TCN1	P20061
TCN2	P20062
TDGF1	P13385
TECTA	O75443
TECTB	Q96PL2
TEK	Q02763
TEPP	Q6URK8
TEX101	Q9BY14
TEX264	Q9Y6I9
TF	P02787
TFF1	P04155
TFF2	Q03403
TFF3
TFPI	P10646
TFPI2	P48307
TFRC	P02786
TG	P01266
TGFA	P01135
TGFB1	P01137
TGFB2	P61812
TGFB3	P10600
TGFBI	Q15582
TGFBR3	Q03167
THBS1	P07996
THBS2	P35442
THBS3	P49746
THBS4	P35443
THEM6	Q8WUY1
THNSL2	Q86YJ6
THPO	P40225
THSD4	Q6ZMP0
THSD7A	Q9UPZ6
TIMP1	P01033
TIMP2	P16035
TIMP3	P35625
TIMP4	Q99727
TINAG	Q9UJW2
TINAGL1	Q9GZM7
TLL1	O43897
TLL2	Q9Y6L7
TMEFF2	Q9UIK5
TMEM155	Q4W5P6
TNC	P24821
TNF	P01375
TNFAIP6	P98066
TNFRSF11B	O00300
TNFRSF18	Q9Y5U5
TNFRSF1A	P19438
TNFRSF1B	P20333
TNFRSF25	Q93038
TNFRSF6B	O95407
TNFSF10	P50591
TNFSF11	O14788
TNFSF12	O43508
TNFSF13	O75888
TNFSF13B	Q9Y275
TNFSF14	O43557
TNFSF15	O95150
TNN	Q9UQP3
TNR	Q92752
TNXB	P22105
TOR2A	Q5JU69, Q8N2E6
TPSAB1	Q15661
TPSB2	P20231
TREML4	Q6UXN2
TRH	P20396
TSHB	P01222
TSKU	Q8WUA8
TSLP	Q969D9
TSPEAR	Q8WU66
TTC9B	Q8N6N2
TTR	P02766
TUFT1	Q9NNX1
TULP2	O00295
TULP3	O75386
TWSG1	Q9GZX9
TXNDC16	Q9P2K2
UCMA	Q8WVF2
UCN	P55089
UCN2	Q96RP3
UCN3	Q969E3
ULBP2	Q9BZM5
UMOD	P07911
UTS2	O95399
UTS2B	Q765I0
VASH1	Q7L8A9
VASH2	Q86V25
VASN	Q6EMK4
VCAN	P13611
VEGFA	P15692
VEGFB	P49765
VEGFC	P49767
VEGFD	O43915
VGF	O15240
VIP	P01282
VIT	Q6UXI7
VMO1	Q7Z5L0
VNN3	Q9NY84
VSTM1	Q6UX27
VSTM2A	Q8TAG5
VSTM2L	Q96N03
VSTM4	Q8IW00
VTN	P04004
VWA1	Q6PCB0
VWA2	Q5GFL6
VWA3A	A6NCI4
VWA5B1	Q5TIE3
VWA7	Q9Y334
VWC2	Q2TAL6
VWC2L	B2RUY7
VWCE	Q96DN2
VWDE	Q8N2E2
VWF	P04275
WDR25	Q64LD2
WFDC1	Q9HC57
WFDC10A	Q9H1F0
WFDC10B	Q8IUB3
WFDC11	Q8NEX6
WFDC12	Q8WWY7
WFDC13	Q8IUB5
WFDC2	Q14508
WFDC3	Q8IUB2
WFDC5	Q8TCV5
WFDC6	Q9BQY6
WFDC8	Q8IUA0
WFDC9	Q8NEX5
WFIKKN1	Q96NZ8
WFIKKN2	Q8TEU8
WIF1	Q9Y5W5
WISP1	O95388
WISP2	O76076
WISP3	O95389
WNT1	P04628
WNT10A	Q9GZT5
WNT10B	O00744
WNT11	O96014
WNT16	Q9UBV4
WNT2	P09544
WNT2B	Q93097
WNT3	P56703
WNT3A	P56704
WNT4	P56705
WNT5A	P41221
WNT5B	Q9H1J7
WNT6	Q9Y6F9
WNT7A	O00755
WNT7B	P56706
WNT8A	Q9H1J5
WNT8B	Q93098
WNT9A	O14904
WNT9B	O14905
XCL1	P47992
XCL2	Q9UBD3
XYLT1	Q86Y38
XYLT2	Q9H1B5
ZG16	O60844
ZG16B	Q96DA0
ZP1	P60852
ZP2	Q05996
ZP3	P21754
ZP4	Q12836
ZPBP	Q9BS86
ZPBP2	Q6X784

## Sheet: Phobius
Genes (Phobius)	Uniprot		Gene name in threshold	IDs in threshold		Genes in Phobius and threshold
A1BG	P04217		ATP5F1A	K7EJP1		FN1
A2M	P01023			K7EK77		PRDX4
A2ML1	A8K2U0			K7ENJ4		TXNDC12
A4GNT	Q9UNA3			K7EQH4
AADACL2	Q6P093			K7ERX7
AAGAB	Q6PD74			P25705
AANAT	Q16613			P25705-2
ABCA6	Q8N139		CNN2	A0A087X271
ABCA7	Q8IZY2			B4DDF4
ABCG1	P45844			B4DUT8
ABHD1	Q96SE0			H3BVI6
ABHD10	Q9NUJ1			K7ES69
ABHD14A	Q9BUJ0			Q99439
ABHD14A-ACY1				Q99439-2
ABHD15	Q6UXT9		EWSR1	A0A0D9SFL3
ABHD17A	Q96GS6			B0QYK0
ABHD17B	Q5VST6			C9JGE3
ABI3BP	Q7Z7G0			H7BY36
ABLIM1	O14639			Q01844
ABR	Q12979			Q01844-2
ABRAXAS1	Q6UWZ7			Q01844-3
AC004233.2				Q01844-5
AC006518.7				Q01844-6
AC008687.1			FN1	H0Y4K8
AC009086.2				H0Y7Z1
AC073896.1				P02751
AC079341.3				P02751-10
AC092718.8				P02751-11
AC114490.3				P02751-12
AC126283.2				P02751-13
AC134669.1				P02751-14
AC135050.2				P02751-15
AC136352.3				P02751-17
AC136428.1				P02751-3
AC145212.1	Q8WZ33			P02751-4
AC233755.1	P0DP08			P02751-5
AC243967.1				P02751-6
ACACB	O00763			P02751-7
ACAD9	Q9H845			P02751-8
ACADS	P16219			P02751-9
ACADVL	P49748		H2AC11; H2AC13; H2AC15; H2AC16; H2AC17	P0C0S8
ACAN			H2AC20	Q16777
ACAT1	P24752		H2AC4; H2AC8	P04908
ACE	P12821		H2AC6	Q93077
ACHE	P22303		H2AC7	P20671
ACOT9	Q9Y305		H2AJ	H0YFX9
ACOX3	O15254			Q9BTM1
ACOXL	Q9NUZ1			Q9BTM1-2
ACP2	P11117		H2AW	Q7L7L0
ACP5	P13686		H2AX	P16104
ACP6	Q9NPH0		H2AZ2	C9J0D1
ACP7	Q6ZNF0			C9J386
ACPP	P15309			Q71UI9
ACR	P10323			Q71UI9-2
ACRBP	Q8NEB7			Q71UI9-3
ACRV1	P26436			Q71UI9-4
ACSF2	Q96CM8			Q71UI9-5
ACSM3	Q53FZ2		KRT8	F8VP67
ACTL10	Q5JWF8			F8VUG2
ACVR1	Q04771			F8W1U3
ACVR1C	Q8NER5			P05787
ACVRL1	P37023			P05787-2
ACYP1	P07311		LSM3	P62310
ACYP2	P14621		MYL6B	F8W1I5
ADA2	Q9NZK5			P14649
ADAM10	O14672		NUCKS1	Q9H1E3
ADAM12	O43184			Q9H1E3-2
ADAM15	Q13444		PEA15	B1AKZ5
ADAM17	P78536			Q15121
ADAM18	Q9Y3Q7			Q15121-2
ADAM22	Q9P0K1		PRDX4	H7C3T4
ADAM28	Q9UKQ2			Q13162
ADAM29	Q9UKF5		PSMB6	P28072
ADAM32	Q8TC27		RPS15	A0A0B4J2B4
ADAM33	Q9BZ11			K7EJ78
ADAM7	Q9H2U9			K7ELC2
ADAM8	P78325			K7EM56
ADAM9	Q13443			K7EQJ5
ADAMDEC1	O15204			P62841
ADAMTS1	Q9UHI8			S4R417
ADAMTS10	Q9H324			S4R456
ADAMTS12	P58397		SEPTIN11	D6RDU5
ADAMTS13	Q76LX8			D6RER5
ADAMTS14	Q8WXS8			D6RGI3
ADAMTS15	Q8TE58			Q9NVA2
ADAMTS16	Q8TE57			Q9NVA2-2
ADAMTS17	Q8TE56		SEPTIN6	B1AMS2
ADAMTS18	Q8TE60			Q14141
ADAMTS19	Q8TE59			Q14141-2
ADAMTS2	O95450			Q14141-3
ADAMTS20	P59510			Q14141-4
ADAMTS3	O15072		SEPTIN7	A0A0U1RRE1
ADAMTS5	Q9UNA0			A0A0U1RRH9
ADAMTS6	Q9UKP5			E7EPK1
ADAMTS7	Q9UKP4			E7ES33
ADAMTS8	Q9UP79			G3V1Q4
ADAMTS9	Q9P2N4			Q16181
ADAMTSL1	Q8N6G6			Q16181-2
ADAMTSL2	Q86TH1		SEPTIN8	A0A087X142
ADAMTSL4	Q6UY14			A6NFQ9
ADAMTSL5				A6NMH6
ADAP1	O75689			C9JV02
ADCK1	Q86TW2			F8W8I8
ADCY6	O43306			Q92599
ADCYAP1	P18509			Q92599-2
ADCYAP1R1	P41586			Q92599-3
ADGRA3	Q8IWK6			Q92599-4
ADGRB2	O60241		SFN	P31947
ADGRD1	Q6QNK2			P31947-2
ADGRE3	Q9BY15		SPTAN1	A0A0D9SF54
ADGRE5	P48960			A0A0D9SGF6
ADGRF1	Q5T601			Q13813
ADGRG1	Q9Y653			Q13813-2
ADGRG5	Q8IZF4			Q13813-3
ADGRG6	Q86SQ4		SRSF2	J3KP15
ADGRV1	Q8WXG9			J3QL05
ADI1	Q9BV57			Q01130
ADIG	Q0VDE8			Q01130-2
ADIPOQ	Q15848		TXN	P10599
ADM	P35318			P10599-2
ADM2	Q7Z4H4		TXNDC12	O95881
ADM5	C9JUS6		YWHAB	A0A0J9YWE8
ADPGK	Q9BRR6			A0A0J9YWZ2
ADPRH	P54922			P31946
ADPRHL1	Q8NDY3			P31946-2
ADPRHL2	Q9NX46			Q4VY19
ADRM1	Q16186			Q4VY20
AEBP1	Q8IUX7		YWHAG	P61981
AFG1L	Q8WV93		YWHAH	A2IDB2
AFM	P43652			Q04917
AFP	P02771
AGA	P20933
AGER	Q15109
AGK	Q53H12
AGMO	Q6ZNB7
AGPS	O00116
AGR2	O95994
AGR3	Q8TD06
AGRN	O00468
AGRP	O00253
AGT	P01019
AGTPBP1	Q9UPW5
AGTRAP	Q6RW13
AHCTF1	Q8WYP5
AHCYL2	Q96HN2
AHSG	P02765
AIG1	Q9NVV5
AK4	P27144
AKAP10	O43572
AKR1C1	Q04828
AL049629.2
AL049634.2
AL110118.2
AL117348.2
AL160272.2
AL162417.1
AL163195.3
AL163636.2
AL354761.1
AL358113.1
AL645922.1
AL645941.2
AL662899.1
AL929554.1
ALAS2	P22557
ALB	P02768
ALDH1B1	P30837
ALDH2	P05091
ALDH9A1	P49189
ALDOA	P04075
ALG1	Q9BT22
ALG5	Q9Y673
ALG9	Q9H6U8
ALKAL1	Q6UXT8
ALKAL2	Q6UX46
ALKBH1	Q13686
ALKBH5	Q6P6C2
ALKBH7	Q9BT30
ALPI	P09923
ALPL	P05186
ALPP	P05187
ALPPL2	P10696
AMBN	Q9NP70
AMBP	P02760
AMD1	P17707
AMELX	Q99217
AMELY	Q99218
AMH	P03971
AMPD1	P23109
AMT	P48728
AMTN	Q6UX39
AMY1A	P04745
AMY1B	P04745
AMY1C	P04745
AMY2A	P04746
AMY2B	P19961
ANG	P03950
ANGEL1	Q9UNK9
ANGPT1	Q15389
ANGPT2	O15123
ANGPT4	Q9Y264
ANGPTL1	O95841
ANGPTL2	Q9UKU9
ANGPTL3	Q9Y5C1
ANGPTL4	Q9BY76
ANGPTL5	Q86XS5
ANGPTL6	Q8NI99
ANGPTL7	O43827
ANGPTL8	Q6UXH0
ANK1	P16157
ANKDD1A	Q495B1
ANKRD54	Q6NXT1
ANKRD60	Q9BZ19
ANO7	Q6IWH7
ANOS1	P23352
ANTXR1	Q9H6X2
AOAH	P28039
AOC1	P19801
AOC2	O75106
AOC3	Q16853
AP000721.1
AP000790.2
AP000790.4
AP000812.4
AP002347.1
AP003108.2
APBB1	O00213
APCDD1	Q8J025
APCS	P02743
APLN	Q9ULZ1
APLP2	Q06481
APOA1	P02647
APOA2	P02652
APOA4	P06727
APOA5	Q6Q788
APOB	P04114
APOC1	P02654
APOC2	P02655
APOC3	P02656
APOC4	P55056
APOD	P05090
APOE	P02649
APOF	Q13790
APOH	P02749
APOL1	O14791
APOL3	O95236
APOO	Q9BUR5
APOOL	Q6UXV4
ARCN1	P48444
ARFIP2	P53365
ARHGAP25	P42331
ARHGAP36	Q6ZRI8
ARHGAP45	Q92619
ARHGAP6	O43182
ARL16	Q0P5N6
ARMC5	Q96C12
ARNTL	O00327
ARSA	P15289
ARSB	P15848
ARSE	P51690
ARSG	Q96EG1
ARSI	Q5FYB1
ARSK	Q6UWY0
ART3	Q13508
ART4	Q93070
ART5	Q96L15
ARTN	Q5T4W7
ASAH1	Q13510
ASAH2	Q9NR71
ASCL1	P50553
ASIP	P42127
ASNSD1	L0R819, Q9NWL6
ASPN	Q9BXN1
ASTL	Q6HA08
ATAD5	Q96QE3
ATAT1	Q5SQI0
ATG2A	Q2TAZ0
ATG5	Q9H1Y0
ATMIN	O43313
ATP11A	P98196
ATP5PB	P24539
ATP6AP1	Q15904
ATP6AP2	O75787
ATP6V0A2	Q9Y487
ATPAF1	Q5TC12
ATXN2	Q99700
ATXN2L	Q8WWM7
AUH	Q13825
AVP	P01185
AXIN2	Q9Y2T1
AZGP1	P25311
AZU1	P20160
B2M	P61769
B3GALNT2	Q8NCR0
B3GALT1	Q9Y5Z6
B3GALT4	O96024
B3GALT5	Q9Y2C3
B3GALT6	Q96L58
B3GAT3	O94766
B3GLCT	Q6Y288
B3GNT3	Q9Y2A9
B3GNT4	Q9C0J1
B3GNT6	Q6ZMB0
B3GNT7	Q8NFL0
B3GNT8	Q7Z7M8
B3GNT9	Q6UX72
B4GALNT1	Q00973
B4GALNT3	Q6L9W6
B4GALNT4	Q76KP1
B4GALT2	O60909
B4GALT3	O60512
B4GALT4	O60513
B4GALT5	O43286
B4GALT6	Q9UBX8
B4GAT1	O43505
B9D1	Q9UPM9
BACE2	Q9Y5Z0
BAP1	Q92560
BATF3	Q9NR55
BCAM	P50895
BCAN	Q96GW7
BCAP29	Q9UHQ4
BCAT2	O15382
BCHE	P06276
BCKDHA	P12694
BCKDHB	P21953
BDH1	Q02338
BDH2	Q9BUT1
BDNF	P23560
BGLAP	P02818
BGN	P21810
BICDL1	Q6ZP65
BLVRB	P30043
BMP1	P13497
BMP10	O95393
BMP15	O95972
BMP2	P12643
BMP3	P12645
BMP4	P12644
BMP5	P22003
BMP6	P22004
BMP7	P18075
BMP8A	Q7Z5Y6
BMP8B	P34820
BMPER	Q8N8U9
BMPR1A	P36894
BNC1	Q01954
BOC	Q9BWV1
BOD1	Q96IK1
BOLA1	Q9Y3E2
BOLA3	Q53S33
BPHL	Q86WA6
BPI	P17213
BPIFA1	Q9NP55
BPIFA2	Q96DR5
BPIFA3	Q9BQP9
BPIFB1	Q8TDL5
BPIFB2	Q8N4F0
BPIFB3	P59826
BPIFB4	P59827
BPIFB6	Q8NFQ5
BPIFC	Q8NFQ6
BRD9	Q9H8M2
BRF1	Q92994
BRINP2	Q9C0B6
BSG	P35613
BSPH1	Q075Z2
BST1	Q10588
BTBD1	Q9H0C5
BTBD17	A6NE02
BTD	P43251
BTG2	P78543
BTG3	Q14201
BTLA	Q7Z6A9
BTN2A2	Q8WVV5
BTN3A1	O00481
BTN3A2	P78410
BTN3A3	O00478
BTRC	Q9Y297
BX088645.1
BX248415.1
C10orf95
C10orf99	Q6UWK7
C11orf1	Q9H5F2
C11orf24	Q96F05
C11orf45	Q8TAV5
C11orf68	Q9H3H3
C11orf94	C9JXX5
C12orf49	Q9H741
C12orf73	Q69YU5
C12orf76	Q8N812
C14orf93	Q9H972
C15orf61	A6NNL5
C16orf89	Q6UX73
C17orf58	Q2M2W7
C17orf67	Q0P5P2
C17orf78	Q8N4C9
C17orf99	Q6UX52
C18orf54	Q8IYD9
C19orf47	Q8N9M1
C1GALT1	Q9NS00
C1orf127
C1orf159	Q96HA4
C1orf198	Q9H425
C1orf54	Q8WWF1
C1orf56	Q9BUN1
C1QA	P02745
C1QB	P02746
C1QC	P02747
C1QL1	O75973
C1QL2	Q7Z5L3
C1QL3	Q5VWW1
C1QL4	Q86Z23
C1QTNF1	Q9BXJ1
C1QTNF12	Q5T7M4
C1QTNF2	Q9BXJ5
C1QTNF3	Q9BXJ4
C1QTNF4	Q9BXJ3
C1QTNF5	Q9BXJ0
C1QTNF7	Q9BXJ2
C1QTNF8	P60827
C1QTNF9	P0C862
C1QTNF9B	B2RNN3
C1R	P00736
C1RL	Q9NZP8
C1S	P09871
C2	P06681
C20orf204
C21orf33	P30042
C21orf62	Q9NYP8
C22orf15	Q8WYQ4
C22orf46	C9J442
C2CD2	Q9Y426
C2CD4B	A6NLJ0
C2orf40	Q9H1Z8
C2orf66	Q6UXQ4
C2orf69	Q8N8R5
C2orf78	A6NCI8
C2orf92
C3	P01024
C3orf33	Q6P1S2
C3orf58	Q8NDZ4
C3orf85
C4A	P0C0L4
C4B	P0C0L5
C4BPA	P04003
C4BPB	P20851
C4orf48	Q5BLP8
C5	P01031
C5orf46	Q6UWT4
C5orf63	A6NC05
C6	P13671
C6orf10	Q5SRN2
C6orf120	Q7Z4R8
C6orf15	Q6UXA7
C6orf58	Q6P5S2
C7	P10643
C7orf57	Q8NEG2
C8A	P07357
C8B	P07358
C8G	P07360
C8orf33	Q9H7E9
C9	P02748
C9orf47	Q6ZRZ4
CA11	O75493
CA6	P23280
CAAP1	Q9H8G2
CABLES1	Q8TDN4
CABP1	Q9NZU7
CACNA2D1	P54289
CACNA2D4	Q7Z3S7
CADM3	Q8N126
CALCA	P01258, P06881
CALCB	P10092
CALCR
CALCRL	Q16602
CALHM4	Q5JW98
CALR	P27797
CALR3	Q96L12
CALU	O43852
CAMK2D	Q13557
CAMK4	Q16566
CAMP
CAMTA1	Q9Y6Y1
CANX	P27824
CAPNS1	P04632
CARM1	Q86X55
CARNS1	A5YM72
CARTPT	Q16568
CASQ1	P31415
CASQ2	O14958
CATSPERG	Q6ZRH7
CBLB	Q13191
CBLN1	P23435
CBLN2	Q8IUK8
CBLN3	Q6UW01
CBLN4	Q9NTU7
CCDC112	Q8NEF3
CCDC126	Q96EE4
CCDC134	Q9H6E4
CCDC149	Q6ZUS6
CCDC194	A0A1B0GVG4
CCDC3	Q9BQI4
CCDC70	Q6NSX1
CCDC80	Q76M96
CCDC85A	Q96PX6
CCER2	I3L3R5
CCK	P06307
CCL1	P22362
CCL11	P51671
CCL13	Q99616
CCL14	Q16627
CCL15	Q16663
CCL16	O15467
CCL17	Q92583
CCL18	P55774
CCL19	Q99731
CCL2	P13500
CCL20	P78556
CCL21	O00585
CCL22	O00626
CCL23	P55773
CCL24	O00175
CCL25	O15444
CCL26	Q9Y258
CCL27	Q9Y4X3
CCL28	Q9NRJ3
CCL3	P10147
CCL3L1	P16619
CCL4	P13236
CCL4L2	Q8NHW4
CCL5	P13501
CCL7	P80098
CCL8	P80075
CCNB1IP1	Q9NPC3
CCNDBP1	O95273
CCNL1	Q9UK58
CCNL2	Q96S94
CD14	P08571
CD160	O95971
CD164	Q04900
CD177
CD1E	P15812
CD2	P06729
CD200	P41217
CD200R1	Q8TD46
CD22	P20273
CD226	Q15762
CD24
CD276	Q5ZPR3
CD300A	Q9UGN4
CD300LB	A8K4G0
CD300LF	Q8TDQ1
CD300LG	Q6UXG3
CD37	P11049
CD3D	P04234
CD4	P01730
CD40	P25942
CD44	P16070
CD48	P09326
CD5	P06127
CD55	P08174
CD59	P13987
CD5L	O43866
CD6	P30203
CD68	P34810
CD7	P09564
CD86	P42081
CD8A	P01732
CD8B	P10966
CD99	P14209
CDC23	Q9UJX2
CDC40	O60508
CDC45	O75419
CDCP1	Q9H5V8
CDCP2	Q5VXM1
CDH1	P12830
CDH11	P55287
CDH13	P55290
CDH17	Q12864
CDH18	Q13634
CDH19	Q9H159
CDH23	Q9H251
CDH5	P33151
CDHR1	Q96JP9
CDHR4	A6H8M9
CDHR5	Q9HBB8
CDK13	Q14004
CDK17	Q00537
CDK2AP1	O14519
CDKN2A	P42771, Q8N726
CDNF	Q49AH0
CDON	Q4KMG0
CDSN
CEACAM16	Q2WEN9
CEACAM18	A8MTB9
CEACAM19	Q7Z692
CEACAM5	P06731
CEACAM8	P31997
CEBPD	P49716
CEL
CELA2A	P08217
CELA2B	P08218
CELA3A	P09093
CELA3B	P08861
CEMIP	Q8WUJ3
CENPO	Q9BU64
CENPV	Q7Z7K6
CENPVL1
CENPVL2
CENPW	Q5EE01
CEP57	Q86XR8
CEP89	Q96ST8
CER1	O95813
CERCAM	Q5T4B2
CERS1	P27544
CES1	P23141
CES3	Q6UWW8
CES4A	Q5XG92
CETP	P11597
CFAP45	Q9UL16
CFAP65	Q6ZU64
CFB	P00751
CFC1	P0CG37
CFC1B	P0CG36
CFD	P00746
CFDP1	Q9UEE9
CFH	P08603
CFHR1	Q03591
CFHR2	P36980
CFHR3	Q02985
CFHR4	Q92496
CFHR5	Q9BXR6
CFI	P05156
CFP	P27918
CGA	P01215
CGB1	A6NKQ9
CGB2
CGB3	P0DN86
CGB5	P0DN86
CGB7	P0DN87
CGB8	P0DN86
CGREF1	Q99674
CHAD	O15335
CHADL	Q6NUI6
CHD2	O14647
CHEK2	O96017
CHGA	P10645
CHGB	P05060
CHI3L1	P36222
CHI3L2	Q15782
CHIA	Q9BZP6
CHID1	Q9BWS9
CHIT1	Q13231
CHL1	O00533
CHN1	P15882
CHPF	Q8IZ52
CHPF2	Q9P2E5
CHRD	Q9H2X0
CHRDL1	Q9BU40
CHRDL2	Q6WN34
CHRNA2	Q15822
CHRNA5	P30532
CHRNB1	P11230
CHRND	Q07001
CHST1	O43916
CHST10	O43529
CHST11	Q9NPF2
CHST13	Q8NET6
CHST4	Q8NCG5
CHST5	Q9GZS9
CHST6	Q9GZX3
CHST7	Q9NS84
CHST8	Q9H2A9
CHSY1	Q86X52
CHSY3	Q70JA7
CHTF8	P0CG12, P0CG13
CIC	Q96RK0
CIITA	P33076
CILP	O75339
CILP2	Q8IUL8
CKLF	Q9UBR5
CKMT1A	P12532
CKMT1B	P12532
CLCA1	A8K7I4
CLCF1	Q9UBD9
CLDN15	P56746
CLDN6	P56747
CLDN7	O95471
CLDND1	Q9NY35
CLEC11A	Q9Y240
CLEC16A	Q2KHT3
CLEC18A	A5D8T8
CLEC18B	Q6UXF7
CLEC18C	Q8NCF0
CLEC19A	Q6UXS0
CLEC20A
CLEC2B	Q92478
CLEC3A
CLEC3B	P05452
CLECL1	Q8IZS7
CLGN	O14967
CLPP	Q16740
CLPS	P04118
CLPSL1	A2RUU4
CLPSL2	Q6UWE3
CLPX	O76031
CLRN1	P58418
CLSTN3	Q9BQT9
CLU	P10909
CLUL1	Q15846
CLYBL	Q8N0X4
CMA1	P23946
CMPK1	P30085
CNBD1	Q8NA66
CNDP1	Q96KN2
CNOT9	Q92600
CNPY2	Q9Y2B0
CNPY3	Q9BT09
CNPY4	Q8N129
CNTFR	P26992
CNTN1	Q12860
CNTN2	Q02246
CNTN3	Q9P232
CNTN4	Q8IWV2
CNTN5	O94779
CNTNAP2	Q9UHC6
CNTNAP3	Q9BZ76
CNTNAP3B	Q96NU0
COASY	Q13057
COCH	O43405
COG3	Q96JB2
COG8
COG8	Q96MW5
COL10A1	Q03692
COL11A1	P12107
COL11A2	P13942
COL12A1	Q99715
COL14A1	Q05707
COL15A1	P39059
COL16A1	Q07092
COL18A1	P39060
COL19A1	Q14993
COL1A1	P02452
COL1A2	P08123
COL20A1	Q9P218
COL21A1	Q96P44
COL22A1	Q8NFW1
COL24A1	Q17RW2
COL26A1	Q96A83
COL28A1	Q2UY09
COL2A1	P02458
COL3A1	P02461
COL4A1	P02462
COL4A2	P08572
COL4A3	Q01955
COL4A4	P53420
COL4A5	P29400
COL4A6	Q14031
COL5A1	P20908
COL5A2	P05997
COL5A3	P25940
COL6A1	P12109
COL6A2	P12110
COL6A3	P12111
COL6A5
COL6A6	A6NMZ7
COL7A1	Q02388
COL8A1	P27658
COL8A2	P25067
COL9A1	P20849
COL9A2	Q14055
COL9A3	Q14050
COLEC10	Q9Y6Z7
COLEC11	Q9BWP8
COLGALT1	Q8NBJ5
COLGALT2	Q8IYK4
COLQ	Q9Y215
COMP	P49747
COMT	P21964
COPS6	Q7L5N1
COQ10A	Q96MF6
COQ6	Q9Y2Z9
CORT	O00230
COTL1	Q14019
COX16	Q9P0S2
COX5B	P10606
COX7A2
CP	P00450
CPA1	P15085
CPA2	P48052
CPA3	P15088
CPA4	Q9UI42
CPA6	Q8N4T0
CPAMD8	Q8IZJ3
CPB1	P15086
CPB2	Q96IY4
CPE	P16870
CPED1	A4D0V7
CPM	P14384
CPN1	P15169
CPN2	P22792
CPNE1	Q99829
CPNE5	Q9HCH3
CPO	Q8IVL8
CPQ	Q9Y646
CPVL	Q9H3G5
CPXM1	Q96SM3
CPXM2	Q8N436
CPZ	Q66K79
CR1L	Q2VPA4
CRB1	P82279
CRB2	Q5IJ48
CREG1	O75629
CREG2	Q8IUH2
CRELD1	Q96HD1
CRELD2	Q6UXH1
CRH	P06850
CRHBP	P24387
CRHR1	P34998
CRHR2	Q13324
CRISP1	P54107
CRISP2	P16562
CRISP3	P54108
CRISPLD2	Q9H0B8
CRLF1	O75462
CRP	P02741
CRTAC1	Q9NQ79
CRTAP	O75718
CRY2	Q49AN0
CRYAA	P02489
CRYL1	Q9Y2S2
CS	O75390
CSAD	Q9Y600
CSAG1	Q6PB30
CSAG2
CSF1	P09603
CSF1R	P07333
CSF2	P04141
CSF2RA	P15509
CSF3	P09919
CSGALNACT1	Q8TDX6
CSH1	P0DML2
CSH2	P0DML3
CSHL1	Q14406
CSKMT	A8MUP2
CSN1S1	P47710
CSN2	P05814
CSN3	P07498
CSPP1	Q1MSJ5
CST1	P01037
CST11	Q9H112
CST2	P09228
CST3	P01034
CST4	P01036
CST5	P28325
CST6	Q15828
CST7	O76096
CST8	O60676
CST9	Q5W186
CST9L	Q9H4G1
CSTL1	Q9H114
CT55	Q8WUE5
CT83	Q5H943
CTAGE5	O15320, Q96PC5
CTBS	Q01459
CTDNEP1	O95476
CTGF	P29279
CTHRC1	Q96CG8
CTLA4	P16410
CTNND2	Q9UQB3
CTNS	O60931
CTRB1	P17538
CTRB2	Q6GPI1
CTRC	Q99895
CTRL	P40313
CTSA	P10619
CTSB	P07858
CTSC	P53634
CTSD	P07339
CTSE	P14091
CTSF	Q9UBX1
CTSG	P08311
CTSH	P09668
CTSK	P43235
CTSL	P07711
CTSO	P43234
CTSS	P25774
CTSV	O60911
CTSW	P56202
CTSZ	Q9UBR2
CUBN	O60494
CUEDC2	Q9H467
CUL4B	Q13620
CUTA	O60888
CX3CL1	P78423
CXADR	P78310
CXCL1	P09341
CXCL10	P02778
CXCL11	O14625
CXCL12	P48061
CXCL13	O43927
CXCL14	O95715
CXCL17	Q6UXB2
CXCL2	P19875
CXCL3	P19876
CXCL5	P42830
CXCL6	P80162
CXCL8	P10145
CXCL9	Q07325
CXorf36	Q9H7Y0
CYB5D2	Q8WUJ1
CYB5R1	Q9UHQ9
CYHR1	Q6ZMK1
CYP11B1	P15538
CYP11B2	P19099
CYP17A1	P05093
CYP1A1	P04798
CYP20A1	Q6UW02
CYP21A2	P08686
CYP26A1	O43174
CYP26B1	Q9NR63
CYP2A13	Q16696
CYP2A6	P11509
CYP2A7	P20853
CYP2B6	P20813
CYP2C18	P33260
CYP2C19	P33261
CYP2C8	P10632
CYP2C9	P11712
CYP2E1	P05181
CYP2F1	P24903
CYP2J2	P51589
CYP2R1	Q6VVX0
CYP2S1	Q96SQ9
CYP2W1	Q8TAV3
CYP3A4	P08684
CYP46A1	Q9Y6A2
CYP4F11	Q9HBI6
CYP4F2	P78329
CYP4F3	Q08477
CYR61	O00622
CYTL1	Q9NRR1
D2HGDH	Q8N465
DAG1	Q14118
DAND5	Q8N907
DAO	P14920
DAZAP2	Q15038
DBH	P09172
DBNL	Q9UJU6
DCAF5	Q96JK2
DCD	P81605
DCN	P07585
DCTN1	Q14203
DDIAS	Q8IXT1
DDOST	P39656
DDR1	Q08345
DDR2	Q16832
DDRGK1	Q96HY6
DDT	P30046
DDX17	Q92841
DDX20	Q9UHI6
DDX25	Q9UHL0
DDX28	Q9NUL7
DDX39B	Q13838
DEAF1	O75398
DEF8	Q6ZN54
DEFA1	P59665
DEFA1B	P59665
DEFA3	P59666
DEFA4	P12838
DEFA5	Q01523
DEFA6	Q01524
DEFB1	P60022
DEFB103A	P81534
DEFB103B	P81534
DEFB104A	Q8WTQ1
DEFB104B	Q8WTQ1
DEFB105A	Q8NG35
DEFB105B	Q8NG35
DEFB106A	Q8N104
DEFB106B	Q8N104
DEFB107A	Q8IZN7
DEFB107B	Q8IZN7
DEFB108B	Q8NET1
DEFB110	Q30KQ9
DEFB113	Q30KQ7
DEFB114	Q30KQ6
DEFB115	Q30KQ5
DEFB116	Q30KQ4
DEFB118	Q96PH6
DEFB119	Q8N690
DEFB121	Q5J5C9
DEFB123	Q8N688
DEFB124	Q8NES8
DEFB125	Q8N687
DEFB126	Q9BYW3
DEFB127	Q9H1M4
DEFB128	Q7Z7B8
DEFB129	Q9H1M3
DEFB130A	P0DP74
DEFB130B	P0DP73
DEFB131A	P59861
DEFB131B	A0A096LNP1
DEFB132	Q7Z7B7
DEFB133	Q30KQ1
DEFB134	Q4QY38
DEFB135	Q30KP9
DEFB136	Q30KP8
DEFB4A	O15263
DEFB4B	O15263
DEPP1	Q9NTK1
DHH	O43323
DHRS11	Q6UWP2
DHRS13	Q6UX07
DHRS4	Q9BTZ2
DHRS4L2	Q6PKH6
DHRS7	Q9Y394
DHRS7C	A6NNS2
DHRS9	Q9BPW9
DHRSX	Q8N5I4
DHX29	Q7Z478
DHX30	Q7L2E3
DHX8	Q14562
DIXDC1	Q155Q3
DKK1	O94907
DKK2	Q9UBU2
DKK3	Q9UBP4
DKK4	Q9UBT3
DKKL1	Q9UK85
DLG3	Q92796
DLG4	P78352
DLK1	P80370
DLL1	O00548
DLL3	Q9NYJ7
DLX4	Q92988
DMKN	Q6E0U4
DMP1	Q13316
DMRTA2	Q96SC8
DNAAF5	Q86Y56
DNAH14	Q0VDD8
DNAJB11	Q9UBS4
DNAJB9	Q9UBS3
DNAJC19	Q96DA6
DNAJC25-GNG10
DNASE1	P24855
DNASE1L1	P49184
DNASE1L2	Q92874
DNASE1L3	Q13609
DNASE2	O00115
DNASE2B	Q8WZ79
DOCK10	Q96BY6
DPEP1	P16444
DPEP2	Q9H4A9
DPEP3	Q9H4B8
DPF3	Q92784
DPH1	Q9BZG8
DPP4	P27487
DPP7	Q9UHL4
DPT	Q07507
DRAXIN	Q8NBI3
DSE	Q9UL01
DSG2	Q14126
DSPP	Q9NZW4
DUOX1	Q9NRD9
DUSP6	Q16828
DYNLT3	P51808
E2F5	Q15329
EBAG9	O00559
EBI3	Q14213
ECHDC1	Q9NTX5
ECHDC3	Q96DC8
ECM1	Q16610
ECM2	O94769
EDDM3A	Q14507
EDDM3B	P56851
EDEM1	Q92611
EDEM2	Q9BV94
EDEM3	Q9BZQ6
EDIL3	O43854
EDN1	P05305
EDN2	P20800
EDN3	P14138
EFEMP1	Q12805
EFEMP2	O95967
EFNA1	P20827
EFNA2	O43921
EFNA4	P52798
EGFL6	Q8IUX8
EGFL7	Q9UHF1
EGFL8	Q99944
EGFLAM	Q63HQ2
EGFR	P00533
EHBP1	Q8NDI1
EHF	Q9NZC4
EHMT1	Q9H9B1
EHMT2	Q96KQ7
EIF2AK1	Q9BQI3
EIF3M	Q7L2H7
ELAC1	Q9H777
ELAC2	Q9BQ52
ELANE	P08246
ELN	P15502
ELOF1	P60002
ELP2	Q6IA86
ELP3	Q9H9T3
ELP4	Q96EB1
ELSPBP1	Q96BH3
EMC10	Q5UCC4
EMCN	Q9ULC0
EMID1	Q96A84
EMILIN1	Q9Y6C2
EMILIN2	Q9BXX0
EMILIN3	Q9NT22
EMP3	P54852
ENAM	Q9NRM1
ENDOG	Q14249
ENDOU	P21128
ENO4	A6NNW6
ENPP2	Q13822
ENPP6	Q6UWR7
ENPP7	Q6UWV6
ENTPD4	Q9Y227
ENTPD5	O75356
ENTPD8	Q5MY95
EOGT	Q5NDL2
EPCAM	P16422
EPDR1	Q9UM22
EPGN	Q6UW88
EPHA10	Q5JZY3
EPHA3	P29320
EPHA4	P54764
EPHA7	Q15375
EPHA8	P29322
EPHB2	P29323
EPHB4	P54760
EPHX3	Q9H6B9
EPO	P01588
EPPIN	O95925
EPPIN-WFDC6	O95925
EPS15	P42566
EPS8L1	Q8TE68
EPX	P11678
EPYC	Q99645
EQTN	Q9NQ60
ERAP1	Q9NZ08
ERAP2	Q6P179
ERBB3	P21860
ERFE	Q4G0M1
ERLIN1	O75477
ERLIN2	O94905
ERN1	O75460
ERN2	Q76MJ5
ERO1A	Q96HE7
ERO1B	Q86YB8
ERP27	Q96DN0
ERP29	P30040
ERP44	Q9BS26
ERV3-1	Q14264
ESM1	Q9NQ30
ESRP1	Q6NXG1
ETFDH	Q16134
EXOG	Q9Y2C4
EXTL1	Q92935
EXTL2	Q9UBQ6
EYS	Q5T1H1
F10	P00742
F11	P03951
F12	P00748
F13B	P05160
F2	P00734
F2R	P25116
F2RL3	Q96RI0
F5	P12259
F7	P08709
F8	P00451
F9	P00740
FAAH2	Q6GMR7
FAAP100	Q0VG06
FABP6	P51161
FADD	Q13158
FAHD2A	Q96GK7
FAHD2B	Q6P2I3
FAM107B	Q9H098
FAM131A	Q6UXB0
FAM171A1	Q5VUB5
FAM171B	Q6P995
FAM172A	Q8WUF8
FAM177A1	Q8N128
FAM180A	Q6UWF9
FAM189A1	O60320
FAM198A	Q9UFP1
FAM19A1	Q7Z5A9
FAM19A2	Q8N3H0
FAM19A3	Q7Z5A8
FAM19A4	Q96LR4
FAM19A5	Q7Z5A7
FAM20A	Q96MK3
FAM20B	O75063
FAM20C	Q8IXL6
FAM213A	Q9BRX8
FAM220A	Q7Z4H9
FAM237B
FAM3B	P58499
FAM3C	Q92520
FAM46B	Q96A09
FAM57A	Q8TBR7
FAM69A	Q5T7M9
FAM69C	Q0P6D2
FAM78A	Q5JUQ0
FAM96A	Q9H5X1
FAM9B	Q8IZU0
FAP	Q12884
FAS	P25445
FAT1	Q14517
FBLIM1	Q8WUP2
FBLN1	P23142
FBLN2	P98095
FBLN5	Q9UBX5
FBLN7	Q53RD9
FBN1	P35555
FBN2	P35556
FBN3	Q75N90
FBRS	Q9HAH7
FBXL12	Q9NXK8
FBXL4	Q9UKA2
FCAR	P24071
FCGBP
FCGR1B	Q92637
FCGR3A	P08637
FCGRT	P55899
FCN1	O00602
FCN2	Q15485
FCN3	O75636
FCRL1	Q96LA6
FCRL3	Q96P31
FCRL5	Q96RD9
FCRLA	Q7L513
FCRLB	Q6BAA4
FDCSP	Q8NFU4
FECH	P22830
FETUB	Q9UGM5
FGA	P02671
FGB	P02675
FGF10	O15520
FGF17	O60258
FGF18	O76093
FGF19	O95750
FGF21	Q9NSA1
FGF22	Q9HCT0
FGF23	Q9GZV9
FGF3	P11487
FGF4	P08620
FGF5	P12034
FGF7	P21781
FGF8	P55075
FGFBP1	Q14512
FGFBP2	Q9BYJ0
FGFBP3	Q8TAT2
FGFR1	P11362
FGFR2	P21802
FGFR3	P22607
FGFR4	P22455
FGFRL1	Q8N441
FGG	P02679
FGL1	Q08830
FH	P07954
FHL1	Q13642
FIBIN	Q8TAL6
FICD	Q9BVA6
FIS1	Q9Y3D6
FJX1	Q86VR8
FKBP10	Q96AY3
FKBP11	Q9NYL4
FKBP14	Q9NWM8
FKBP2	P26885
FKBP7	Q9Y680
FKBP9	O95302
FKRP	Q9H9S5
FKTN	O75072
FLOT1	O75955
FLT1	P17948
FLT4	P35916
FLVCR2	Q9UPI3
FMO2	Q99518
FMO3	P31513
FMO5	P49326
FMOD	Q06828
FN1	P02751
FNDC1	Q4ZHG4
FNDC7	Q5VTL7
FOCAD	Q5VW36
FOLH1	Q04609
FOLR2	P14207
FOLR3	P41439
FOXRED2	Q8IWF2
FP565260.6
FPGS	Q05932
FRAS1	Q86XX4
FREM1	Q5H8C1
FREM3	P0C091
FRMPD2	Q68DX3
FRYL	O94915
FRZB	Q92765
FSHB	P01225
FSHR	P23945
FST	P19883
FSTL1	Q12841
FSTL4	Q6MZW2
FSTL5	Q8N475
FTCDNL1	E5RQL4
FTMT	Q8N4E7
FUCA1	P04066
FUCA2	Q9BTY2
FURIN	P09958
FUT10	Q6P4F1
FUT11	Q495W5
FUT3	P21217
FXN	Q16595
FXR1	P51114
FXYD3	Q14802
FZD3	Q9NPG1
GABBR1	Q9UBS5
GABRA1	P14867
GABRA2	P47869
GABRA5	P31644
GABRD	O14764
GABRG3	Q99928
GABRP	O00591
GADD45GIP1	Q8TAE8
GAL	P22466
GAL3ST1	Q99999
GAL3ST2	Q9H3Q3
GAL3ST3	Q96A11
GALC	P54803
GALNS	P34059
GALNT10	Q86SR1
GALNT12	Q8IXK2
GALNT15	Q8N3T1
GALNT17	Q6IS24
GALNT2	Q10471
GALNT4	Q8N4A0
GALNT5	Q7Z7M9
GALNT6	Q8NCL4
GALNT8	Q9NY28, P17658
GALNTL6	Q49A17
GALP	Q9UBC7
GALT	P07902
GANAB	Q14697
GAPDHS	O14556
GAREM2	Q75VX8
GARS	P41250
GAS6	Q14393
GAST	P01350
GATD1	Q8NB37
GBA	P04062
GBGT1	Q8N5D6
GBX2	P52951
GC	P02774
GCG	P01275
GCGR	P47871
GCNT1	Q02742
GCNT2	Q8N0V5
GCNT4	Q9P109
GCNT7	Q6ZNI0
GCOM1
GCSH	P23434
GDF1	P27539
GDF10	P55107
GDF11	O95390
GDF15	Q99988
GDF2	Q9UK05
GDF3	Q9NR23
GDF5	P43026
GDF6	Q6KF10
GDF7	Q7Z4P5
GDF9	O60383
GDNF	P39905
GFM1	Q96RP9
GFOD2	Q3B7J2
GFPT2	O94808
GFRA2	O00451
GFRA4	Q9GZZ7
GGA2	Q9UJY4
GGH	Q92820
GGT1	P19440
GGT5	P36269
GH1	P01241
GH2	P01242
GHDC	Q8N2G8
GHRH	P01286
GHRHR	Q02643
GHRL	Q9UBU3
GIF	P27352
GIP	P09681
GKN1	Q9NS71
GKN2	Q86XP6
GLA	P06280
GLB1	P16278
GLB1L	Q6UWU2
GLB1L2	Q8IW92
GLCE	O94923
GLDC	P23378
GLDN	Q6ZMI3
GLG1	Q92896
GLIPR1	P48060
GLIPR1L1	Q6UWM5
GLIS3	Q8NEA6
GLRB	P48167
GLS	O94925
GLT1D1	Q96MS3
GLT6D1	Q7Z4J2
GLT8D1	Q68CQ7
GLTPD2	A6NH11
GLUD1	P00367
GM2A	P17900
GML	Q99445
GNA12	Q03113
GNA13	Q14344
GNAS	O95467, P63092, P84996, Q5JWF2
GNLY	P22749
GNPTG	Q9UJJ9
GNRH1	P01148
GNRH2	O43555
GNS	P15586
GOLM1	Q8NBJ4
GORAB	Q5T7V8
GOT2	P00505
GP2	P55259
GP6	Q9HCN6
GPC2	Q8N158
GPC5	P78333
GPC6	Q9Y625
GPD2	P43304
GPHA2	Q96T91
GPHB5	Q86YW7
GPIHBP1	Q8IV16
GPLD1	P80108
GPNMB	Q14956
GPR162	Q16538
GPX3	P22352
GPX4	P36969
GPX5	O75715
GPX6	P59796
GPX7	Q96SL4
GREM1	O60565
GREM2	Q9H772
GRHL3	Q8TE85
GRIA2	P42262
GRIA3	P42263
GRIA4	P48058
GRIK2	Q13002
GRIN2B	Q13224
GRM2	Q14416
GRM3	Q14832
GRM5	P41594
GRN	P28799
GRP	P07492
GSDME	O60443
GSG1	Q2KHT4
GSN	P06396
GTPBP10	A4D1E9
GUCA2A	Q02747
GUCA2B	Q16661
GUK1	Q16774
GUSB	P08236
GXYLT1	Q4G148
GXYLT2	A0PJZ3
GYPB	P06028
GZMA	P12544
GZMB	P10144
GZMH	P20718
GZMK	P49863
GZMM	P51124
H2BFWT	Q7Z2G1
H6PD	O95479
HABP2	Q14520
HABP4	Q5JVS0
HADHB	P55084
HAMP	P81172
HAPLN1	P10915
HAPLN2	Q9GZV7
HAPLN3	Q96S86
HAPLN4	Q86UW8
HARS2	P49590
HAVCR1	Q96D42
HCCS	P53701
HCRT	O43612
HDAC6	Q9UBN7
HDAC9	Q9UKV0
HDHD5	Q9BXW7
HEATR5A	Q86XA9
HEPH	Q9BQS7
HEXA	P06865
HEXB	P07686
HFE2	Q6ZVN8
HGF	P14210
HGFAC	Q04756
HHIP	Q96QV1
HHIPL1	Q96JK4
HHIPL2	Q6UWX4
HHLA1	C9JL84
HHLA2	Q9UM44
HIBADH	P31937
HINT2	Q9BX68
HLA-A	P04439, P13746, P16188
HLA-C	P10321
HLA-DOA	P06340
HLA-DPA1	P20036
HLA-DQA1	P01909
HLA-DQB1
HLA-DQB2	P05538
HMCN1	Q96RW7
HMCN2	Q8NDA2
HMGCL	P35914
HMGN5	P82970
HMSD	A8MTL9, P0C7T4
HP	P00738
HPGD	P15428
HPR	P00739
HPSE	Q9Y251
HPSE2	Q8WWQ2
HPX	P02790
HRC	P23327
HRG	P04196
HS2ST1	Q7LGA3
HS3ST1	O14792
HS3ST5	Q8IZT8
HS6ST1	O60243
HS6ST2	Q96MM7
HSD11B1L	Q7Z5J1
HSD17B1	P14061
HSD17B10	Q99714
HSD17B11	Q8NBQ5
HSD17B13	Q7Z5P4
HSD17B3	P37058
HSD17B4	P51659
HSD17B7	P56937
HSP90B1	P14625
HSPA13	P48723
HSPA5	P11021
HSPG2	P98160
HTATIP2	Q9BUP3
HTN1	P15515
HTN3	P15516
HTRA1	Q92743
HTRA3	P83110
HTRA4	P83105
HYAL1	Q12794
HYAL2	Q12891
HYAL3	O43820
HYOU1	Q9Y4L1
IAPP	P10997
IBSP	P21815
ICAM1	P05362
ICAM2	P13598
ICAM4	Q14773
ID1	P41134
IDE	P14735
IDI1	Q13907
IDNK	Q5T6J7
IDS	P22304
IDUA	P35475
IER3IP1	Q9Y5U9
IFI27L2	Q9H2X8
IFI30	P13284
IFNA1	P01562
IFNA10	P01566
IFNA13	P01562
IFNA14	P01570
IFNA16	P05015
IFNA17	P01571
IFNA2	P01563
IFNA21	P01568
IFNA4	P05014
IFNA5	P01569
IFNA6	P05013
IFNA7	P01567
IFNA8	P32881
IFNAR1	P17181
IFNB1	P01574
IFNE	Q86WN2
IFNG	P01579
IFNGR1	P15260
IFNL1	Q8IU54
IFNL2	Q8IZJ0
IFNL3	Q8IZI9
IFNLR1	Q8IU57
IFNW1	P05000
IFT27	Q9BW83
IGF1	P05019
IGF2	P01344
IGFALS	P35858
IGFBP1	P08833
IGFBP2	P18065
IGFBP3	P17936
IGFBP4	P22692
IGFBP5	P24593
IGFBP6	P24592
IGFBP7	Q16270
IGFBPL1	Q8WX77
IGFL1	Q6UW32
IGFL2	Q6UWQ7
IGFL3	Q6UXB1
IGFL4	Q6B9Z1
IGFLR1	Q9H665
IGIP	A6NJ69
IGLON5	A6NGN9
IGSF10	Q6WRI0
IGSF11	Q5DX21
IGSF21	Q96ID5
IGSF8	Q969P0
IGSF9	Q9P2J2
IHH	Q14623
IL10	P22301
IL11	P20809
IL11RA	Q14626
IL12B	P29460
IL12RB1	P42701
IL12RB2	Q99665
IL13	P35225
IL13RA1	P78552
IL15	P40933
IL15RA	Q13261
IL17A	Q16552
IL17B	Q9UHF5
IL17C	Q9P0M4
IL17D	Q8TAD2
IL17F	Q96PD4
IL17RA	Q96F46
IL17RC	Q8NAC3
IL17RE	Q8NFR9
IL18BP	O95998
IL18R1	Q13478
IL18RAP	O95256
IL19	Q9UHD0
IL1R1	P14778
IL1R2	P27930
IL1RAP	Q9NPH3
IL1RL1	Q01638
IL1RL2	Q9HB29
IL1RN	P18510
IL2	P60568
IL20	Q9NYY1
IL20RA	Q9UHF4
IL21	Q9HBE4
IL22	Q9GZX6
IL22RA2	Q969J5
IL23A	Q9NPF7
IL24	Q13007
IL25	Q9H293
IL26	Q9NPH9
IL27	Q8NEV9
IL2RB	P14784
IL3	P08700
IL31	Q6EBC2
IL31RA	Q8NI17
IL32	P24001
IL34	Q6ZMJ4
IL3RA	P26951
IL4	P05112
IL4I1	Q96RQ9
IL4R	P24394
IL5	P05113
IL5RA	Q01344
IL6	P05231
IL6R	P08887
IL6ST	P40189
IL7	P13232
IL7R	P16871
IL9	P15248
ILDR1	Q86SU0
ILDR2	Q71H61
ILVBL	A1L0T0
IMMT	Q16891
IMP4	Q96G21
IMPG1	Q17R60
INHA	P05111
INHBA	P08476
INHBB	P09529
INHBC	P55103
INHBE	P58166
INO80D	Q53TQ3
INPP5A	Q14642
INPP5K	Q9BT40
INS	P01308
INS-IGF2	F8WCM5
INSL3	P51460
INSL4	Q14641
INSL5	Q9Y5Q6
INSL6	Q9Y581
INTS3	Q68E01
INVS	Q9Y283
IPO11	Q9UI26
IPO9	Q96P70
IQCF6	A8MYZ5
IQCH	Q86VS3
IQSEC1	Q6DN90
IRF2BP2	Q7Z5L9
IRS4	O14654
ISLR	O14498
ISLR2	Q6UXK2
ISM1	B1AKI9
ISM2	Q6H9L7
ITGA9	Q13797
ITGAL	P20701
ITGAX	P20702
ITGB1	P05556
ITGB2	P05107
ITGB3	P05106
ITGB7	P26010
ITGBL1	O95965
ITIH1	P19827
ITIH2	P19823
ITIH3	Q06033
ITIH4	Q14624
ITIH5
ITIH6	Q6UXX5
ITLN1	Q8WWA0
ITLN2	Q8WWU7
ITM2C	Q9NQX7
IZUMO1R	A6ND01
IZUMO4	Q1ZYL8
JAML	Q86YT9
JCHAIN	P01591
JMJD7	P0C870
JMJD8	Q96S16
KANSL2	Q9H9L4
KANTR
KAT5	Q92993
KAZALD1	Q96I82
KCNIP2	Q9NS61
KCNIP3	Q9Y2W7
KCNK7	Q9Y2U2
KCNN4	O15554
KCNQ2	O43526
KCP
KDELC1	Q6UW63
KDELC2	Q7Z4H8
KDM1A	O60341
KDM3B	Q7LBC6
KDM6A	O15550
KDM7A	Q6ZMT4
KDSR	Q06136
KERA	O60938
KHK	P50053
KIAA0100	Q14667
KIAA0319	Q5VV43
KIFC2	Q96AC6
KIR2DL4	Q99706
KIR3DX1
KIRREL2	Q6UWL6
KISS1	Q15726
KITLG	P21583
KLC4	Q9NSK0
KLHL11	Q9NVR0
KLHL21	Q9UJP4
KLHL22	Q53GT1
KLK1	P06870
KLK10	O43240
KLK11	Q9UBX7
KLK12	Q9UKR0
KLK13	Q9UKR3
KLK14	Q9P0G3
KLK15	Q9H2R5
KLK2	P20151
KLK3	P07288
KLK4	Q9Y5K2
KLK5	Q9Y337
KLK6	Q92876
KLK7	P49862
KLK8	O60259
KLK9	Q9UKQ9
KLKB1	P03952
KMT5A	Q9NQR1
KNDC1	Q76NI1
KNG1	P01042
KRBA2	Q6ZNG9
KREMEN2	Q8NCW0
KRT72	Q14CN4
KRTAP10-1	P60331
KRTAP10-5	P60370
KRTAP16-1	A8MUX0
KRTAP2-3	P0C7H8
KRTAP2-4	Q9BYR9
KRTAP20-4	Q3LI62
KRTAP4-16
KRTDAP	P60985
KYAT1	Q16773
L1CAM	P32004
L3MBTL2	Q969R5
LACRT	Q9GZZ8
LACTB	P83111
LAG3	P18627
LAIR2	Q6ISS4
LALBA	P00709
LAMA1	P25391
LAMA2	P24043
LAMA3	Q16787
LAMA4	Q16363
LAMA5	O15230
LAMB1	P07942
LAMB2	P55268
LAMB3	Q13751
LAMB4	A4D0S4
LAMC1	P11047
LAMC2	Q13753
LAMC3	Q9Y6N6
LAMP3	Q9UQV4
LARGE2	Q8N3Y3
LAT	O43561
LAT2	Q9GZY6
LBP	P18428
LCAT	P04180
LCN1	P31025
LCN10	Q6JVE6
LCN12	Q6JVE5
LCN15	Q6UWW0
LCN2	P80188
LCN6	P62502
LCN8	Q6JVE9
LCN9	Q8WX39
LCORL	Q8N3X6
LDLR	P01130
LDLRAD2	Q5SZI1
LDOC1	O95751
LEAP2	Q969E1
LECT2	O14960
LEFTY1	O75610
LEFTY2	O00292
LEP	P41159
LFNG	Q8NES3
LGALS3BP	Q08380
LGI1	O95970
LGI2	Q8N0V4
LGI3	Q8N145
LGI4	Q8N135
LGMN	Q99538
LGR4	Q9BXB1
LHB	P01229
LHCGR	P22888
LIF	P15018
LIFR	P42702
LIG3	P49916
LILRA2	Q8N149
LILRB3	O75022
LIME1	Q9H400
LINGO1	Q96FE5
LIPA	P38571
LIPC	P11150
LIPF	P07098
LIPG	Q9Y5X9
LIPH	Q8WWY8
LIPK	Q5VXJ0
LIPM	Q5VYY2
LIPN	Q5VXI9
LMBR1	Q8WVP7
LMNB2	Q03252
LMNTD1	Q8N9Z9
LNX1	Q8TBB1
LOX	P28300
LOXL1	Q08397
LOXL2	Q9Y4K0
LOXL3	P58215
LOXL4	Q96JB6
LPA	P08519
LPL	P06858
LPO	P22079
LRAT	O95237
LRCH3	Q96II8
LRCOL1	A6NCL2
LRFN4	Q6PJG9
LRFN5	Q96NI6
LRG1	P02750
LRP1	Q07954
LRP11	Q86VZ4
LRP1B	Q9NZR2
LRP2	P98164
LRP4	O75096
LRPAP1	P30533
LRRC14	Q15048
LRRC17	Q8N6Y2
LRRC32	Q14392
LRRC37B	Q96QE4
LRRC3B	Q96PB8
LRRC4B	Q9NT99
LRRN3	Q9H3W5
LRRTM1	Q86UE6
LRRTM2	O43300
LRRTM4	Q86VH4
LSM14B	Q9BX40
LSR	Q86X29
LST1	O00453
LTA	P01374
LTBP1	Q14766
LTBP2	Q14767
LTBP3	Q9NS15
LTBP4	Q8N2S1
LTBR	P36941
LTF	P02788
LTK	P29376
LUM	P51884
LUZP2	Q86TE4
LVRN	Q6Q4G3
LY6E	Q16553
LY6G5B	Q8NDX9
LY6G6D	O95868
LY6G6E
LY6H	O94772
LY6K	Q17RY6
LY6L	H3BQJ8
LY86	O95711
LY96	Q9Y6Y9
LYG1	Q8N1E2
LYG2	Q86SG7
LYNX1	P0DP58
LYNX1-SLURP2
LYPD1	Q8N2G4
LYPD2	Q6UXB3
LYPD4	Q6UWN0
LYPD6	Q86Y78
LYPD6B	Q8NI32
LYPD8	Q6UX82
LYZ	P61626
LYZL4	Q96KX0
LYZL6	O75951
M6PR	P20645
MAG	P20916
MAGED1	Q9Y5V3
MAGT1	Q9H0U3
MAMDC2	Q7Z304
MAN2B1	O00754
MAN2B2	Q9Y2E5
MANBA	O00462
MANEA	Q5SRI9
MANEAL	Q5VSG8
MANF
MANSC1	Q9H8J5
MAP2K2	P36507
MAP3K4	Q9Y6R4
MAP3K9	P80192
MAPK1	P28482
MARCOL
MASP1	P48740
MASP2	O00187
MATN1	P21941
MATN2	O00339
MATN3	O15232
MATN4	O95460
MATR3	P43243
MATR3
MAU2	Q9Y6X3
MAZ	P56270
MBD6	Q96DN6
MBL2	P11226
MBNL1	Q9NR56
MCC	P23508
MCCC1	Q96RQ3
MCEE	Q96PE7
MCF2L	O15068
MCFD2	Q8NI22
MCM5	P33992
MDFIC	Q9P1T7
MDGA1	Q8NFP4
MDH2	P40926
MDK	P21741
MED20	Q9H944
MEGF10	Q96KG7
MEGF6	O75095
MEI1	Q5TIA1
MEI4	A8MW99
MEIS1	O00470
MEIS3	Q99687
MELTF	P08582
MEPE	Q9NQ76
MESD	Q14696
MEST	Q5EB52
MET	P08581
METAP2	P50579
METRN	Q9UJH8
METRNL	Q641Q3
METTL17	Q9H7H0
METTL24	Q5JXM2
METTL7B	Q6UX53
METTL9	Q9H1A3
MEX3C	Q5U5Q3
MFAP2	P55001
MFAP3	P55082
MFAP3L	O75121
MFAP4	P55083
MFAP5	Q13361
MFGE8	Q08431
MFHAS1	Q9Y4C4
MFNG	O00587
MGA	Q8IWI9
MGAT2	Q10469
MGAT3	Q09327
MGAT4A	Q9UM21
MGAT4B	Q9UQ53
[truncated: 1,339 more rows]

## Sheet: MDSEC
Gene (MDSEC)	Uniprot		Gene name in threshold	IDs in threshold		Genes in MDSEC and threshold
A1BG	P04217		ATP5F1A	K7EJP1		FN1
A2M	P01023			K7EK77		PRDX4
A2ML1	A8K2U0			K7ENJ4		TXNDC12
A4GNT	Q9UNA3			K7EQH4
AADACL2	Q6P093			K7ERX7
AANAT	Q16613			P25705
ABCG1	P45844			P25705-2
ABHD1	Q96SE0		CNN2	A0A087X271
ABHD10	Q9NUJ1			B4DDF4
ABHD14A	Q9BUJ0			B4DUT8
ABHD14A-ACY1				H3BVI6
ABHD15	Q6UXT9			K7ES69
ABI3BP	Q7Z7G0			Q99439
ABRAXAS1	Q6UWZ7			Q99439-2
AC004233.2			EWSR1	A0A0D9SFL3
AC006518.7				B0QYK0
AC008687.1				C9JGE3
AC009086.2				H7BY36
AC073896.1				Q01844
AC079341.3				Q01844-2
AC092718.8				Q01844-3
AC114490.3				Q01844-5
AC126283.2				Q01844-6
AC134669.1			FN1	H0Y4K8
AC135050.2				H0Y7Z1
AC136352.3				P02751
AC136428.1				P02751-10
AC145212.1	Q8WZ33			P02751-11
AC233755.1	P0DP08			P02751-12
AC243967.1				P02751-13
ACACB	O00763			P02751-14
ACAN				P02751-15
ACE	P12821			P02751-17
ACHE	P22303			P02751-3
ACP2	P11117			P02751-4
ACP5	P13686			P02751-5
ACP6	Q9NPH0			P02751-6
ACP7	Q6ZNF0			P02751-7
ACPP	P15309			P02751-8
ACR	P10323			P02751-9
ACRBP	Q8NEB7		H2AC11; H2AC13; H2AC15; H2AC16; H2AC17	P0C0S8
ACRV1	P26436		H2AC20	Q16777
ACSF2	Q96CM8		H2AC4; H2AC8	P04908
ACTL10	Q5JWF8		H2AC6	Q93077
ACVR1	Q04771		H2AC7	P20671
ACVR1C	Q8NER5		H2AJ	H0YFX9
ACVRL1	P37023			Q9BTM1
ACYP1	P07311			Q9BTM1-2
ACYP2	P14621		H2AW	Q7L7L0
ADA2	Q9NZK5		H2AX	P16104
ADAM10	O14672		H2AZ2	C9J0D1
ADAM12	O43184			C9J386
ADAM15	Q13444			Q71UI9
ADAM17	P78536			Q71UI9-2
ADAM18	Q9Y3Q7			Q71UI9-3
ADAM22	Q9P0K1			Q71UI9-4
ADAM28	Q9UKQ2			Q71UI9-5
ADAM29	Q9UKF5		KRT8	F8VP67
ADAM32	Q8TC27			F8VUG2
ADAM33	Q9BZ11			F8W1U3
ADAM7	Q9H2U9			P05787
ADAM8	P78325			P05787-2
ADAM9	Q13443		LSM3	P62310
ADAMDEC1	O15204		MYL6B	F8W1I5
ADAMTS1	Q9UHI8			P14649
ADAMTS10	Q9H324		NUCKS1	Q9H1E3
ADAMTS12	P58397			Q9H1E3-2
ADAMTS13	Q76LX8		PEA15	B1AKZ5
ADAMTS14	Q8WXS8			Q15121
ADAMTS15	Q8TE58			Q15121-2
ADAMTS16	Q8TE57		PRDX4	H7C3T4
ADAMTS17	Q8TE56			Q13162
ADAMTS18	Q8TE60		PSMB6	P28072
ADAMTS19	Q8TE59		RPS15	A0A0B4J2B4
ADAMTS2	O95450			K7EJ78
ADAMTS20	P59510			K7ELC2
ADAMTS3	O15072			K7EM56
ADAMTS5	Q9UNA0			K7EQJ5
ADAMTS6	Q9UKP5			P62841
ADAMTS7	Q9UKP4			S4R417
ADAMTS8	Q9UP79			S4R456
ADAMTS9	Q9P2N4		SEPTIN11	D6RDU5
ADAMTSL1	Q8N6G6			D6RER5
ADAMTSL2	Q86TH1			D6RGI3
ADAMTSL3	P82987			Q9NVA2
ADAMTSL4	Q6UY14			Q9NVA2-2
ADAMTSL5			SEPTIN6	B1AMS2
ADCK1	Q86TW2			Q14141
ADCYAP1	P18509			Q14141-2
ADCYAP1R1	P41586			Q14141-3
ADGRA3	Q8IWK6			Q14141-4
ADGRB2	O60241		SEPTIN7	A0A0U1RRE1
ADGRD1	Q6QNK2			A0A0U1RRH9
ADGRE3	Q9BY15			E7EPK1
ADGRE5	P48960			E7ES33
ADGRF1	Q5T601			G3V1Q4
ADGRG1	Q9Y653			Q16181
ADGRG5	Q8IZF4			Q16181-2
ADGRG6	Q86SQ4		SEPTIN8	A0A087X142
ADGRV1	Q8WXG9			A6NFQ9
ADI1	Q9BV57			A6NMH6
ADIG	Q0VDE8			C9JV02
ADIPOQ	Q15848			F8W8I8
ADM	P35318			Q92599
ADM2	Q7Z4H4			Q92599-2
ADM5	C9JUS6			Q92599-3
ADPGK	Q9BRR6			Q92599-4
ADPRHL2	Q9NX46		SFN	P31947
AEBP1	Q8IUX7			P31947-2
AFG1L	Q8WV93		SPTAN1	A0A0D9SF54
AFM	P43652			A0A0D9SGF6
AFP	P02771			Q13813
AGA	P20933			Q13813-2
AGER	Q15109			Q13813-3
AGK	Q53H12		SRSF2	J3KP15
AGPS	O00116			J3QL05
AGR2	O95994			Q01130
AGR3	Q8TD06			Q01130-2
AGRN	O00468		TXN	P10599
AGRP	O00253			P10599-2
AGT	P01019		TXNDC12	O95881
AGTPBP1	Q9UPW5		YWHAB	A0A0J9YWE8
AGTRAP	Q6RW13			A0A0J9YWZ2
AHCYL2	Q96HN2			P31946
AHSG	P02765			P31946-2
AIG1	Q9NVV5			Q4VY19
AK4	P27144			Q4VY20
AKAP10	O43572		YWHAG	P61981
AKR1C1	Q04828		YWHAH	A2IDB2
AL049629.2				Q04917
AL049634.2
AL160272.2
AL162417.1
AL163195.3
AL163636.2
AL354761.1
AL358113.1
AL645922.1
AL645941.2
AL662899.1
AL929554.1
ALAS2	P22557
ALB	P02768
ALDH9A1	P49189
ALDOA	P04075
ALG1	Q9BT22
ALG9	Q9H6U8
ALKAL1	Q6UXT8
ALKAL2	Q6UX46
ALKBH1	Q13686
ALKBH5	Q6P6C2
ALPI	P09923
ALPL	P05186
ALPP	P05187
ALPPL2	P10696
AMBN	Q9NP70
AMBP	P02760
AMELX	Q99217
AMELY	Q99218
AMH	P03971
AMPD1	P23109
AMTN	Q6UX39
AMY1A	P04745
AMY1B	P04745
AMY1C	P04745
AMY2A	P04746
AMY2B	P19961
ANG	P03950
ANGEL1	Q9UNK9
ANGPT1	Q15389
ANGPT2	O15123
ANGPT4	Q9Y264
ANGPTL1	O95841
ANGPTL2	Q9UKU9
ANGPTL3	Q9Y5C1
ANGPTL4	Q9BY76
ANGPTL5	Q86XS5
ANGPTL6	Q8NI99
ANGPTL7	O43827
ANGPTL8	Q6UXH0
ANK1	P16157
ANKDD1A	Q495B1
ANKRD54	Q6NXT1
ANKRD60	Q9BZ19
ANO7	Q6IWH7
ANOS1	P23352
ANTXR1	Q9H6X2
AOAH	P28039
AOC1	P19801
AOC2	O75106
AOC3	Q16853
AP000721.1
AP000790.3
AP000790.4
AP002347.1
APBB1	O00213
APCDD1	Q8J025
APCS	P02743
APELA	P0DMC3
APLN	Q9ULZ1
APLP2	Q06481
APOA1	P02647
APOA2	P02652
APOA4	P06727
APOA5	Q6Q788
APOB	P04114
APOC1	P02654
APOC2	P02655
APOC3	P02656
APOC4	P55056
APOD	P05090
APOE	P02649
APOF	Q13790
APOH	P02749
APOL1	O14791
APOL3	O95236
APOM	O95445
APOOL	Q6UXV4
ARCN1	P48444
ARFIP2	P53365
ARHGAP36	Q6ZRI8
ARHGAP45	Q92619
ARHGAP6	O43182
ARL16	Q0P5N6
ARMC5	Q96C12
ARNTL	O00327
ARSA	P15289
ARSB	P15848
ARSE	P51690
ARSG	Q96EG1
ARSI	Q5FYB1
ARSK	Q6UWY0
ART3	Q13508
ART4	Q93070
ART5	Q96L15
ARTN	Q5T4W7
ASAH1	Q13510
ASAH2	Q9NR71
ASCL1	P50553
ASIP	P42127
ASPN	Q9BXN1
ASTL	Q6HA08
ATAD5	Q96QE3
ATAT1	Q5SQI0
ATG2A	Q2TAZ0
ATG5	Q9H1Y0
ATMIN	O43313
ATP13A1	Q9HD20
ATP5PB	P24539
ATP6AP1	Q15904
ATP6AP2	O75787
ATPAF1	Q5TC12
AUH	Q13825
AVP	P01185
AXIN2	Q9Y2T1
AZGP1	P25311
AZU1	P20160
B2M	P61769
B3GALNT2	Q8NCR0
B3GALT1	Q9Y5Z6
B3GALT4	O96024
B3GALT5	Q9Y2C3
B3GALT6	Q96L58
B3GAT3	O94766
B3GLCT	Q6Y288
B3GNT3	Q9Y2A9
B3GNT4	Q9C0J1
B3GNT6	Q6ZMB0
B3GNT7	Q8NFL0
B3GNT8	Q7Z7M8
B3GNT9	Q6UX72
B4GALNT1	Q00973
B4GALNT3	Q6L9W6
B4GALNT4	Q76KP1
B4GALT4	O60513
B4GALT5	O43286
B4GALT6	Q9UBX8
B4GAT1	O43505
B9D1	Q9UPM9
BACE2	Q9Y5Z0
BCAM	P50895
BCAN	Q96GW7
BCAP29	Q9UHQ4
BCAR1	P56945
BCHE	P06276
BCKDHB	P21953
BDNF	P23560
BGLAP	P02818
BGN	P21810
BLVRB	P30043
BMP1	P13497
BMP10	O95393
BMP15	O95972
BMP2	P12643
BMP3	P12645
BMP4	P12644
BMP6	P22004
BMP7	P18075
BMP8A	Q7Z5Y6
BMP8B	P34820
BMPER	Q8N8U9
BNC1	Q01954
BOC	Q9BWV1
BOD1	Q96IK1
BOLA1	Q9Y3E2
BPI	P17213
BPIFA1	Q9NP55
BPIFA2	Q96DR5
BPIFA3	Q9BQP9
BPIFB1	Q8TDL5
BPIFB2	Q8N4F0
BPIFB3	P59826
BPIFB4	P59827
BPIFB6	Q8NFQ5
BPIFC	Q8NFQ6
BRF1	Q92994
BRINP1	O60477
BRINP2	Q9C0B6
BRINP3	Q76B58
BSG	P35613
BSPH1	Q075Z2
BST1	Q10588
BTBD17	A6NE02
BTD	P43251
BTN2A2	Q8WVV5
BTN3A1	O00481
BTN3A2	P78410
BTN3A3	O00478
BX088645.1
BX248415.1
C10orf95
C10orf99	Q6UWK7
C11orf1	Q9H5F2
C11orf24	Q96F05
C11orf45	Q8TAV5
C11orf94	C9JXX5
C12orf10	Q9HB07
C12orf49	Q9H741
C12orf73	Q69YU5
C12orf76	Q8N812
C14orf93	Q9H972
C16orf89	Q6UX73
C16orf90	A8MZG2
C17orf58	Q2M2W7
C17orf67	Q0P5P2
C17orf75	Q9HAS0
C17orf99	Q6UX52
C18orf54	Q8IYD9
C19orf47	Q8N9M1
C19orf70	Q5XKP0
C1GALT1	Q9NS00
C1orf127
C1orf159	Q96HA4
C1orf198	Q9H425
C1orf54	Q8WWF1
C1orf56	Q9BUN1
C1QA	P02745
C1QB	P02746
C1QC	P02747
C1QL1	O75973
C1QL2	Q7Z5L3
C1QL3	Q5VWW1
C1QL4	Q86Z23
C1QTNF1	Q9BXJ1
C1QTNF12	Q5T7M4
C1QTNF2	Q9BXJ5
C1QTNF3	Q9BXJ4
C1QTNF4	Q9BXJ3
C1QTNF5	Q9BXJ0
C1QTNF7	Q9BXJ2
C1QTNF8	P60827
C1QTNF9	P0C862
C1QTNF9B	B2RNN3
C1R	P00736
C1RL	Q9NZP8
C1S	P09871
C2	P06681
C20orf204
C21orf33	P30042
C21orf62	Q9NYP8
C22orf15	Q8WYQ4
C22orf46	C9J442
C2CD2	Q9Y426
C2orf40	Q9H1Z8
C2orf66	Q6UXQ4
C2orf69	Q8N8R5
C2orf92
C3	P01024
C3orf33	Q6P1S2
C3orf58	Q8NDZ4
C3orf85
C4A	P0C0L4
C4B	P0C0L5
C4BPA	P04003
C4BPB	P20851
C4orf48	Q5BLP8
C5	P01031
C5orf46	Q6UWT4
C6	P13671
C6orf120	Q7Z4R8
C6orf15	Q6UXA7
C6orf58	Q6P5S2
C7	P10643
C7orf57	Q8NEG2
C8A	P07357
C8B	P07358
C8G	P07360
C9	P02748
C9orf47	Q6ZRZ4
CA10	Q9NS85
CA11	O75493
CA6	P23280
CA9	Q16790
CABLES1	Q8TDN4
CABP1	Q9NZU7
CACNA2D1	P54289
CACNA2D4	Q7Z3S7
CADM3	Q8N126
CALCA	P01258, P06881
CALCB	P10092
CALCR
CALCRL	Q16602
CALHM4	Q5JW98
CALR	P27797
CALR3	Q96L12
CALU	O43852
CAMK2D	Q13557
CAMP
CANX	P27824
CARM1	Q86X55
CARNS1	A5YM72
CARTPT	Q16568
CASQ1	P31415
CASQ2	O14958
CATSPERG	Q6ZRH7
CBLN1	P23435
CBLN2	Q8IUK8
CBLN3	Q6UW01
CBLN4	Q9NTU7
CCBE1	Q6UXH8
CCDC112	Q8NEF3
CCDC129	Q6ZRS4
CCDC134	Q9H6E4
CCDC149	Q6ZUS6
CCDC194	A0A1B0GVG4
CCDC3	Q9BQI4
CCDC80	Q76M96
CCDC85A	Q96PX6
CCDC88B	A6NC98
CCER2	I3L3R5
CCK	P06307
CCL1	P22362
CCL11	P51671
CCL13	Q99616
CCL14	Q16627
CCL15	Q16663
CCL16	O15467
CCL17	Q92583
CCL18	P55774
CCL19	Q99731
CCL2	P13500
CCL20	P78556
CCL21	O00585
CCL22	O00626
CCL23	P55773
CCL24	O00175
CCL25	O15444
CCL26	Q9Y258
CCL27	Q9Y4X3
CCL28	Q9NRJ3
CCL3	P10147
CCL3L1	P16619
CCL4	P13236
CCL4L2	Q8NHW4
CCL5	P13501
CCL7	P80098
CCL8	P80075
CCNB1IP1	Q9NPC3
CCNL1	Q9UK58
CCNL2	Q96S94
CD14	P08571
CD160	O95971
CD164	Q04900
CD177
CD1E	P15812
CD2	P06729
CD200	P41217
CD200R1	Q8TD46
CD22	P20273
CD226	Q15762
CD24
CD276	Q5ZPR3
CD300A	Q9UGN4
CD300LB	A8K4G0
CD300LF	Q8TDQ1
CD300LG	Q6UXG3
CD3D	P04234
CD4	P01730
CD40	P25942
CD44	P16070
CD48	P09326
CD5	P06127
CD55	P08174
CD59	P13987
CD5L	O43866
CD6	P30203
CD68	P34810
CD7	P09564
CD79A	P11912
CD80	P33681
CD86	P42081
CD8A	P01732
CD8B	P10966
CD99	P14209
CDC23	Q9UJX2
CDC40	O60508
CDC45	O75419
CDCP1	Q9H5V8
CDCP2	Q5VXM1
CDH1	P12830
CDH11	P55287
CDH13	P55290
CDH17	Q12864
CDH18	Q13634
CDH19	Q9H159
CDH23	Q9H251
CDH5	P33151
CDHR1	Q96JP9
CDHR4	A6H8M9
CDHR5	Q9HBB8
CDKN2A	P42771, Q8N726
CDNF	Q49AH0
CDON	Q4KMG0
CDSN
CEACAM16	Q2WEN9
CEACAM18	A8MTB9
CEACAM19	Q7Z692
CEACAM5	P06731
CEACAM7	Q14002
CEACAM8	P31997
CEL
CELA2A	P08217
CELA2B	P08218
CELA3A	P09093
CELA3B	P08861
CEMIP	Q8WUJ3
CEP57	Q86XR8
CEP89	Q96ST8
CER1	O95813
CERCAM	Q5T4B2
CERS1	P27544
CES1	P23141
CES3	Q6UWW8
CES4A	Q5XG92
CES5A	Q6NT32
CETP	P11597
CFAP65	Q6ZU64
CFB	P00751
CFC1	P0CG37
CFC1B	P0CG36
CFD	P00746
CFDP1	Q9UEE9
CFH	P08603
CFHR1	Q03591
CFHR2	P36980
CFHR3	Q02985
CFHR4	Q92496
CFHR5	Q9BXR6
CFI	P05156
CFP	P27918
CGA	P01215
CGB1	A6NKQ9
CGB2
CGB3	P0DN86
CGB5	P0DN86
CGB7	P0DN87
CGB8	P0DN86
CGREF1	Q99674
CHAD	O15335
CHADL	Q6NUI6
CHEK2	O96017
CHGA	P10645
CHGB	P05060
CHI3L1	P36222
CHI3L2	Q15782
CHIA	Q9BZP6
CHID1	Q9BWS9
CHIT1	Q13231
CHL1	O00533
CHN1	P15882
CHPF	Q8IZ52
CHPF2	Q9P2E5
CHRD	Q9H2X0
CHRDL1	Q9BU40
CHRDL2	Q6WN34
CHRNA2	Q15822
CHRNA5	P30532
CHRNB1	P11230
CHRND	Q07001
CHST1	O43916
CHST10	O43529
CHST11	Q9NPF2
CHST13	Q8NET6
CHST4	Q8NCG5
CHST5	Q9GZS9
CHST6	Q9GZX3
CHST7	Q9NS84
CHST8	Q9H2A9
CHSY1	Q86X52
CHSY3	Q70JA7
CHTF8	P0CG12, P0CG13
CILP	O75339
CILP2	Q8IUL8
CKLF	Q9UBR5
CKMT1A	P12532
CKMT1B	P12532
CLCA1	A8K7I4
CLCF1	Q9UBD9
CLDN15	P56746
CLDN7	O95471
CLDND1	Q9NY35
CLEC11A	Q9Y240
CLEC16A	Q2KHT3
CLEC18A	A5D8T8
CLEC18B	Q6UXF7
CLEC18C	Q8NCF0
CLEC19A	Q6UXS0
CLEC20A
CLEC2B	Q92478
CLEC3A
CLEC3B	P05452
CLGN	O14967
CLN5	O75503
CLPS	P04118
CLPSL1	A2RUU4
CLPSL2	Q6UWE3
CLPX	O76031
CLRN1	P58418
CLSTN3	Q9BQT9
CLU	P10909
CLUL1	Q15846
CMA1	P23946
CMPK1	P30085
CNBD1	Q8NA66
CNDP1	Q96KN2
CNOT9	Q92600
CNPY2	Q9Y2B0
CNPY3	Q9BT09
CNPY4	Q8N129
CNTFR	P26992
CNTN1	Q12860
CNTN2	Q02246
CNTN3	Q9P232
CNTN4	Q8IWV2
CNTN5	O94779
CNTNAP2	Q9UHC6
CNTNAP3	Q9BZ76
CNTNAP3B	Q96NU0
COASY	Q13057
COCH	O43405
COG3	Q96JB2
COL10A1	Q03692
COL11A1	P12107
COL11A2	P13942
COL12A1	Q99715
COL14A1	Q05707
COL15A1	P39059
COL16A1	Q07092
COL18A1	P39060
COL19A1	Q14993
COL1A1	P02452
COL1A2	P08123
COL20A1	Q9P218
COL21A1	Q96P44
COL22A1	Q8NFW1
COL24A1	Q17RW2
COL26A1	Q96A83
COL27A1	Q8IZC6
COL28A1	Q2UY09
COL2A1	P02458
COL3A1	P02461
COL4A1	P02462
COL4A2	P08572
COL4A3	Q01955
COL4A4	P53420
COL4A5	P29400
COL4A6	Q14031
COL5A1	P20908
COL5A2	P05997
COL5A3	P25940
COL6A1	P12109
COL6A2	P12110
COL6A3	P12111
COL6A5
COL6A6	A6NMZ7
COL7A1	Q02388
COL8A1	P27658
COL8A2	P25067
COL9A1	P20849
COL9A2	Q14055
COL9A3	Q14050
COLEC10	Q9Y6Z7
COLEC11	Q9BWP8
COLGALT1	Q8NBJ5
COLGALT2	Q8IYK4
COLQ	Q9Y215
COMP	P49747
COPS6	Q7L5N1
COQ6	Q9Y2Z9
CORT	O00230
CP	P00450
CPA1	P15085
CPA2	P48052
CPA3	P15088
CPA4	Q9UI42
CPA6	Q8N4T0
CPAMD8	Q8IZJ3
CPB1	P15086
CPB2	Q96IY4
CPE	P16870
CPM	P14384
CPN1	P15169
CPN2	P22792
CPO	Q8IVL8
CPQ	Q9Y646
CPVL	Q9H3G5
CPXM1	Q96SM3
CPXM2	Q8N436
CPZ	Q66K79
CR1L	Q2VPA4
CRB1	P82279
CRB2	Q5IJ48
CREG1	O75629
CREG2	Q8IUH2
CRELD1	Q96HD1
CRELD2	Q6UXH1
CRH	P06850
CRHBP	P24387
CRHR1	P34998
CRHR2	Q13324
CRISP1	P54107
CRISP2	P16562
CRISP3	P54108
CRISPLD2	Q9H0B8
CRLF1	O75462
CRP	P02741
CRTAC1	Q9NQ79
CRTAP	O75718
CRY2	Q49AN0
CSAD	Q9Y600
CSF1	P09603
CSF1R	P07333
CSF2	P04141
CSF2RA	P15509
CSF3	P09919
CSGALNACT1	Q8TDX6
CSH1	P0DML2
CSH2	P0DML3
CSHL1	Q14406
CSN1S1	P47710
CSN2	P05814
CSN3	P07498
CST1	P01037
CST11	Q9H112
CST2	P09228
CST3	P01034
CST4	P01036
CST5	P28325
CST6	Q15828
CST7	O76096
CST8	O60676
CST9	Q5W186
CST9L	Q9H4G1
CSTL1	Q9H114
CT55	Q8WUE5
CTAGE5	O15320, Q96PC5
CTBS	Q01459
CTGF	P29279
CTHRC1	Q96CG8
CTLA4	P16410
CTNS	O60931
CTRB1	P17538
CTRB2	Q6GPI1
CTRC	Q99895
CTRL	P40313
CTSA	P10619
CTSB	P07858
CTSC	P53634
CTSD	P07339
CTSE	P14091
CTSF	Q9UBX1
CTSG	P08311
CTSH	P09668
CTSK	P43235
CTSL	P07711
CTSO	P43234
CTSS	P25774
CTSV	O60911
CTSW	P56202
CTSZ	Q9UBR2
CUBN	O60494
CUTA	O60888
CX3CL1	P78423
CXADR	P78310
CXCL1	P09341
CXCL10	P02778
CXCL11	O14625
CXCL12	P48061
CXCL13	O43927
CXCL14	O95715
CXCL17	Q6UXB2
CXCL2	P19875
CXCL3	P19876
CXCL5	P42830
CXCL6	P80162
CXCL8	P10145
CXCL9	Q07325
CXorf36	Q9H7Y0
CYB5D2	Q8WUJ1
CYHR1	Q6ZMK1
CYP17A1	P05093
CYP20A1	Q6UW02
CYP21A2	P08686
CYP26B1	Q9NR63
CYP2A13	Q16696
CYP2A6	P11509
CYP2A7	P20853
CYP2B6	P20813
CYP2C18	P33260
CYP2C19	P33261
CYP2C8	P10632
CYP2C9	P11712
CYP2E1	P05181
CYP2F1	P24903
CYP2J2	P51589
CYP2R1	Q6VVX0
CYP2S1	Q96SQ9
CYP2W1	Q8TAV3
CYP46A1	Q9Y6A2
CYP4F11	Q9HBI6
CYP4F2	P78329
CYR61	O00622
CYTL1	Q9NRR1
D2HGDH	Q8N465
DAG1	Q14118
DAND5	Q8N907
DAO	P14920
DAZAP2	Q15038
DBH	P09172
DBNL	Q9UJU6
DCD	P81605
DCN	P07585
DDIAS	Q8IXT1
DDOST	P39656
DDR1	Q08345
DDR2	Q16832
DDT	P30046
DDX17	Q92841
DDX20	Q9UHI6
DDX25	Q9UHL0
DDX28	Q9NUL7
DEAF1	O75398
DEF8	Q6ZN54
DEFA1	P59665
DEFA1B	P59665
DEFA3	P59666
DEFA4	P12838
DEFA5	Q01523
DEFA6	Q01524
DEFB1	P60022
DEFB103A	P81534
DEFB103B	P81534
DEFB104A	Q8WTQ1
DEFB104B	Q8WTQ1
DEFB105A	Q8NG35
DEFB105B	Q8NG35
DEFB106A	Q8N104
DEFB106B	Q8N104
DEFB107A	Q8IZN7
DEFB107B	Q8IZN7
DEFB108B	Q8NET1
DEFB110	Q30KQ9
DEFB113	Q30KQ7
DEFB114	Q30KQ6
DEFB115	Q30KQ5
DEFB116	Q30KQ4
DEFB118	Q96PH6
DEFB119	Q8N690
DEFB121	Q5J5C9
DEFB123	Q8N688
DEFB124	Q8NES8
DEFB125	Q8N687
DEFB126	Q9BYW3
DEFB127	Q9H1M4
DEFB128	Q7Z7B8
DEFB129	Q9H1M3
DEFB130A	P0DP74
DEFB130B	P0DP73
DEFB131A	P59861
DEFB131B	A0A096LNP1
DEFB132	Q7Z7B7
DEFB133	Q30KQ1
DEFB134	Q4QY38
DEFB135	Q30KP9
DEFB136	Q30KP8
DEFB4A	O15263
DEFB4B	O15263
DEPP1	Q9NTK1
DHH	O43323
DHRS7	Q9Y394
DHRS7C	A6NNS2
DHRS9	Q9BPW9
DHRSX	Q8N5I4
DHX29	Q7Z478
DHX30	Q7L2E3
DHX8	Q14562
DIO2	Q92813
DIXDC1	Q155Q3
DKK1	O94907
DKK2	Q9UBU2
DKK3	Q9UBP4
DKK4	Q9UBT3
DKKL1	Q9UK85
DLG4	P78352
DLK1	P80370
DLL1	O00548
DLL3	Q9NYJ7
DMBT1	Q9UGM3
DMKN	Q6E0U4
DMP1	Q13316
DMRTA2	Q96SC8
DNAH14	Q0VDD8
DNAJB11	Q9UBS4
DNAJB9	Q9UBS3
DNAJC25-GNG10
DNAJC3	Q13217
DNASE1	P24855
DNASE1L1	P49184
DNASE1L2	Q92874
DNASE1L3	Q13609
DNASE2	O00115
DNASE2B	Q8WZ79
DPEP1	P16444
DPEP2	Q9H4A9
DPEP3	Q9H4B8
DPF3	Q92784
DPP7	Q9UHL4
DPT	Q07507
DRAXIN	Q8NBI3
DSE	Q9UL01
DSG2	Q14126
DSPP	Q9NZW4
DUOX1	Q9NRD9
DYNLT3	P51808
E2F5	Q15329
EBAG9	O00559
EBI3	Q14213
ECHDC1	Q9NTX5
ECM1	Q16610
ECM2	O94769
ECSIT	Q9BQ95
EDDM3A	Q14507
EDDM3B	P56851
EDEM2	Q9BV94
EDEM3	Q9BZQ6
EDIL3	O43854
EDN1	P05305
EDN2	P20800
EDN3	P14138
EFEMP1	Q12805
EFEMP2	O95967
EFNA1	P20827
EFNA2	O43921
EFNA4	P52798
EGFL6	Q8IUX8
EGFL7	Q9UHF1
EGFL8	Q99944
EGFLAM	Q63HQ2
EGFR	P00533
EHBP1	Q8NDI1
EHF	Q9NZC4
EHMT1	Q9H9B1
EHMT2	Q96KQ7
EIF2AK1	Q9BQI3
ELANE	P08246
ELN	P15502
ELP2	Q6IA86
ELSPBP1	Q96BH3
EMC10	Q5UCC4
EMC9	Q9Y3B6
EMCN	Q9ULC0
EMID1	Q96A84
EMILIN1	Q9Y6C2
EMILIN2	Q9BXX0
EMILIN3	Q9NT22
ENAM	Q9NRM1
ENDOG	Q14249
ENDOU	P21128
ENHO	Q6UWT2
ENO4	A6NNW6
ENPP6	Q6UWR7
ENPP7	Q6UWV6
ENTPD5	O75356
ENTPD8	Q5MY95
EOGT	Q5NDL2
EPCAM	P16422
EPDR1	Q9UM22
EPGN	Q6UW88
EPHA10	Q5JZY3
EPHA3	P29320
EPHA4	P54764
EPHA7	Q15375
EPHA8	P29322
EPHB2	P29323
EPHB4	P54760
EPHX3	Q9H6B9
EPO	P01588
EPPIN	O95925
EPPIN-WFDC6	O95925
EPS15	P42566
EPS8L1	Q8TE68
EPX	P11678
EPYC	Q99645
EQTN	Q9NQ60
ERAP1	Q9NZ08
ERAP2	Q6P179
ERBB3	P21860
ERFE	Q4G0M1
ERLEC1	Q96DZ1
ERLIN1	O75477
ERLIN2	O94905
ERN1	O75460
ERN2	Q76MJ5
ERO1A	Q96HE7
ERO1B	Q86YB8
ERP27	Q96DN0
ERP29	P30040
ERP44	Q9BS26
ERV3-1	Q14264
ESM1	Q9NQ30
ESRP1	Q6NXG1
EXOG	Q9Y2C4
EXTL1	Q92935
EXTL2	Q9UBQ6
F10	P00742
F11	P03951
F12	P00748
F13B	P05160
F2	P00734
F2R	P25116
F2RL3	Q96RI0
F5	P12259
F7	P08709
F8	P00451
F9	P00740
FABP6	P51161
FAM107B	Q9H098
FAM131A	Q6UXB0
FAM171A1	Q5VUB5
FAM171B	Q6P995
FAM172A	Q8WUF8
FAM177A1	Q8N128
FAM180A	Q6UWF9
FAM189A1	O60320
FAM198A	Q9UFP1
FAM19A1	Q7Z5A9
FAM19A2	Q8N3H0
FAM19A3	Q7Z5A8
FAM19A4	Q96LR4
FAM19A5	Q7Z5A7
FAM20A	Q96MK3
FAM20C	Q8IXL6
FAM237B
FAM46B	Q96A09
FAM57A	Q8TBR7
FAM78A	Q5JUQ0
FAM96A	Q9H5X1
FAM9B	Q8IZU0
FAP	Q12884
FAS	P25445
FAT1	Q14517
FBLN1	P23142
FBLN2	P98095
FBLN5	Q9UBX5
FBLN7	Q53RD9
FBN1	P35555
FBN2	P35556
FBN3	Q75N90
FCAR	P24071
FCGBP
FCGR1B	Q92637
FCGR3A	P08637
FCGRT	P55899
FCMR	O60667
FCN1	O00602
FCN2	Q15485
FCN3	O75636
FCRL1	Q96LA6
FCRL3	Q96P31
FCRL5	Q96RD9
FCRLA	Q7L513
FCRLB	Q6BAA4
FDCSP	Q8NFU4
FETUB	Q9UGM5
FGA	P02671
FGB	P02675
FGF10	O15520
FGF17	O60258
FGF18	O76093
FGF19	O95750
FGF21	Q9NSA1
FGF22	Q9HCT0
FGF23	Q9GZV9
FGF3	P11487
FGF4	P08620
FGF5	P12034
FGF7	P21781
FGF8	P55075
FGFBP1	Q14512
FGFBP2	Q9BYJ0
FGFBP3	Q8TAT2
FGFR1	P11362
FGFR2	P21802
FGFR3	P22607
FGFR4	P22455
FGFRL1	Q8N441
FGG	P02679
FGL1	Q08830
FGL2	Q14314
FHL1	Q13642
FHOD3	Q2V2M9
FIBIN	Q8TAL6
FICD	Q9BVA6
FJX1	Q86VR8
FKBP10	Q96AY3
FKBP11	Q9NYL4
FKBP14	Q9NWM8
FKBP2	P26885
FKBP7	Q9Y680
FKBP9	O95302
FLT1	P17948
FLT4	P35916
FMO2	Q99518
FMO3	P31513
FMO5	P49326
FMOD	Q06828
FN1	P02751
FNDC1	Q4ZHG4
FNDC7	Q5VTL7
FOCAD	Q5VW36
FOLR2	P14207
FOLR3	P41439
FOXRED2	Q8IWF2
FP565260.6
FPGS	Q05932
FRAS1	Q86XX4
FREM1	Q5H8C1
FREM3	P0C091
FRMPD2	Q68DX3
FRZB	Q92765
FSHB	P01225
FSHR	P23945
FST	P19883
FSTL1	Q12841
FSTL3	O95633
FSTL4	Q6MZW2
FSTL5	Q8N475
FTCDNL1	E5RQL4
FUCA1	P04066
FUCA2	Q9BTY2
FURIN	P09958
FUT10	Q6P4F1
FUT11	Q495W5
FXN	Q16595
FXR1	P51114
FXYD3	Q14802
GABBR1	Q9UBS5
GABRA1	P14867
GABRA2	P47869
GABRA5	P31644
GABRD	O14764
GABRG3	Q99928
GABRP	O00591
GAL	P22466
GAL3ST1	Q99999
GAL3ST2	Q9H3Q3
GAL3ST3	Q96A11
GALC	P54803
GALNS	P34059
GALNT10	Q86SR1
GALNT12	Q8IXK2
GALNT15	Q8N3T1
GALNT2	Q10471
GALNT6	Q8NCL4
GALNT8	Q9NY28, P17658
GALNTL6	Q49A17
GALP	Q9UBC7
GANAB	Q14697
GARS	P41250
GAS1	P54826
GAS6	Q14393
GAST	P01350
GATD1	Q8NB37
GBA	P04062
GBGT1	Q8N5D6
GC	P02774
GCG	P01275
GCGR	P47871
GCNT7	Q6ZNI0
GCSH	P23434
GDF1	P27539
GDF10	P55107
GDF11	O95390
GDF15	Q99988
GDF2	Q9UK05
GDF3	Q9NR23
GDF5	P43026
GDF6	Q6KF10
GDF7	Q7Z4P5
GDF9	O60383
GDNF	P39905
GFOD2	Q3B7J2
GFPT2	O94808
GFRA2	O00451
GFRA4	Q9GZZ7
GGA2	Q9UJY4
GGH	Q92820
GGT1	P19440
GGT5	P36269
GH1	P01241
GH2	P01242
GHDC	Q8N2G8
GHRH	P01286
GHRHR	Q02643
GHRL	Q9UBU3
GIF	P27352
GIP	P09681
GKN1	Q9NS71
GKN2	Q86XP6
GLA	P06280
GLB1	P16278
GLB1L	Q6UWU2
GLB1L2	Q8IW92
GLCE	O94923
GLG1	Q92896
GLIPR1	P48060
GLIPR1L1	Q6UWM5
GLIS3	Q8NEA6
GLMP	Q8WWB7
GLRB	P48167
GLS	O94925
GLT6D1	Q7Z4J2
GLTPD2	A6NH11
GLUD1	P00367
GM2A	P17900
GML	Q99445
GNAS	O95467, P63092, P84996, Q5JWF2
GNLY	P22749
GNPTG	Q9UJJ9
GNRH1	P01148
GNRH2	O43555
GNS	P15586
GOLM1	Q8NBJ4
GORAB	Q5T7V8
GOT2	P00505
GP2	P55259
GP6	Q9HCN6
GPC2	Q8N158
GPC5	P78333
GPC6	Q9Y625
GPD2	P43304
GPER1	Q99527
GPHA2	Q96T91
GPHB5	Q86YW7
GPIHBP1	Q8IV16
GPLD1	P80108
GPNMB	Q14956
GPR162	Q16538
GPX3	P22352
GPX4	P36969
GPX5	O75715
GPX6	P59796
GPX7	Q96SL4
GREM1	O60565
GREM2	Q9H772
GRHL3	Q8TE85
GRIA2	P42262
GRIA3	P42263
GRIA4	P48058
GRIK2	Q13002
GRIN2B	Q13224
GRM2	Q14416
GRM3	Q14832
GRM5	P41594
GRN	P28799
GRP	P07492
GSDME	O60443
GSG1	Q2KHT4
GSN	P06396
GTDC1	Q4AE62
GTPBP10	A4D1E9
GUCA2A	Q02747
GUCA2B	Q16661
GUSB	P08236
GXYLT1	Q4G148
GXYLT2	A0PJZ3
GYPB	P06028
GZMA	P12544
GZMB	P10144
GZMH	P20718
GZMK	P49863
GZMM	P51124
H6PD	O95479
HABP2	Q14520
HADHB	P55084
HAMP	P81172
HAPLN1	P10915
HAPLN2	Q9GZV7
HAPLN3	Q96S86
HAPLN4	Q86UW8
HARS2	P49590
HAVCR1	Q96D42
HCCS	P53701
HCRT	O43612
HDAC6	Q9UBN7
HDHD5	Q9BXW7
HEATR5A	Q86XA9
HEPH	Q9BQS7
HEXA	P06865
HEXB	P07686
HFE2	Q6ZVN8
HGF	P14210
HGFAC	Q04756
HHIP	Q96QV1
HHIPL1	Q96JK4
HHIPL2	Q6UWX4
HHLA1	C9JL84
HHLA2	Q9UM44
HIBADH	P31937
HINT2	Q9BX68
HLA-A	P04439, P13746, P16188
HLA-C	P10321
HLA-DOA	P06340
HLA-DPA1	P20036
HLA-DQA1	P01909
HLA-DQB1
HLA-DQB2	P05538
HMCN1	Q96RW7
HMCN2	Q8NDA2
HMGCL	P35914
HMSD	A8MTL9, P0C7T4
HP	P00738
HPR	P00739
HPSE	Q9Y251
HPSE2	Q8WWQ2
HPX	P02790
HRC	P23327
HRG	P04196
HS2ST1	Q7LGA3
HS3ST1	O14792
HS6ST1	O60243
HS6ST2	Q96MM7
HS6ST3	Q8IZP7
HSD11B1L	Q7Z5J1
HSD17B11	Q8NBQ5
HSD17B7	P56937
HSP90B1	P14625
HSPA13	P48723
HSPA5	P11021
HSPG2	P98160
HTATIP2	Q9BUP3
HTN1	P15515
HTN3	P15516
HTRA1	Q92743
HTRA3	P83110
HTRA4	P83105
HYAL1	Q12794
HYAL2	Q12891
HYAL3	O43820
HYOU1	Q9Y4L1
IAPP	P10997
IBSP	P21815
ICAM1	P05362
ICAM2	P13598
ICAM4	Q14773
ID1	P41134
IDE	P14735
IDNK	Q5T6J7
IDS	P22304
IDUA	P35475
IER3IP1	Q9Y5U9
IFI27L2	Q9H2X8
IFI30	P13284
IFNA1	P01562
IFNA10	P01566
IFNA13	P01562
IFNA14	P01570
IFNA16	P05015
IFNA17	P01571
IFNA2	P01563
IFNA21	P01568
IFNA4	P05014
IFNA5	P01569
IFNA6	P05013
IFNA7	P01567
IFNA8	P32881
IFNAR1	P17181
IFNB1	P01574
IFNE	Q86WN2
IFNG	P01579
IFNGR1	P15260
IFNL1	Q8IU54
IFNL2	Q8IZJ0
IFNL3	Q8IZI9
IFNLR1	Q8IU57
IFNW1	P05000
IGF1	P05019
IGF2	P01344
IGFALS	P35858
IGFBP1	P08833
IGFBP2	P18065
IGFBP3	P17936
IGFBP4	P22692
IGFBP5	P24593
IGFBP6	P24592
IGFBP7	Q16270
IGFBPL1	Q8WX77
IGFL1	Q6UW32
IGFL2	Q6UWQ7
IGFL3	Q6UXB1
IGFLR1	Q9H665
IGIP	A6NJ69
IGLON5	A6NGN9
IGSF1	Q8N6C5
IGSF10	Q6WRI0
IGSF11	Q5DX21
IGSF21	Q96ID5
IGSF8	Q969P0
IGSF9	Q9P2J2
IHH	Q14623
IL10	P22301
IL11	P20809
IL11RA	Q14626
IL12B	P29460
IL12RB1	P42701
IL12RB2	Q99665
IL13	P35225
IL13RA1	P78552
IL15RA	Q13261
IL17A	Q16552
IL17B	Q9UHF5
IL17C	Q9P0M4
IL17D	Q8TAD2
IL17F	Q96PD4
IL17RA	Q96F46
IL17RC	Q8NAC3
IL17RE	Q8NFR9
IL18BP	O95998
IL18R1	Q13478
IL18RAP	O95256
IL19	Q9UHD0
IL1R1	P14778
IL1R2	P27930
IL1RAP	Q9NPH3
IL1RL1	Q01638
IL1RL2	Q9HB29
IL1RN	P18510
IL2	P60568
IL20	Q9NYY1
IL20RA	Q9UHF4
IL21	Q9HBE4
IL22	Q9GZX6
IL22RA2	Q969J5
IL23A	Q9NPF7
IL24	Q13007
IL25	Q9H293
IL26	Q9NPH9
IL27	Q8NEV9
IL2RB	P14784
IL3	P08700
IL31	Q6EBC2
IL31RA	Q8NI17
IL32	P24001
IL34	Q6ZMJ4
IL3RA	P26951
IL4	P05112
IL4I1	Q96RQ9
IL4R	P24394
IL5	P05113
IL5RA	Q01344
IL6	P05231
IL6R	P08887
IL6ST	P40189
IL7	P13232
IL7R	P16871
IL9	P15248
ILDR1	Q86SU0
ILDR2	Q71H61
ILVBL	A1L0T0
IMP4	Q96G21
IMPG1	Q17R60
INHA	P05111
INHBA	P08476
INHBB	P09529
INHBC	P55103
INHBE	P58166
INPP5A	Q14642
INS	P01308
INS-IGF2	F8WCM5
INSL3	P51460
INSL4	Q14641
INSL5	Q9Y5Q6
INSL6	Q9Y581
INTS3	Q68E01
IPO11	Q9UI26
IPO9	Q96P70
IQCF6	A8MYZ5
IRAK3	Q9Y616
IRS4	O14654
ISLR	O14498
ISLR2	Q6UXK2
ISM1	B1AKI9
ISM2	Q6H9L7
ITGA4	P13612
ITGA9	Q13797
ITGAL	P20701
ITGAX	P20702
ITGB1	P05556
ITGB2	P05107
ITGB3	P05106
ITGB7	P26010
ITGBL1	O95965
ITIH1	P19827
ITIH2	P19823
ITIH3	Q06033
ITIH4	Q14624
ITIH5
ITIH6	Q6UXX5
ITLN1	Q8WWA0
ITLN2	Q8WWU7
IZUMO1R	A6ND01
IZUMO4	Q1ZYL8
JAML	Q86YT9
JCHAIN	P01591
JMJD8	Q96S16
KANSL2	Q9H9L4
KANTR
KAZALD1	Q96I82
KCNIP2	Q9NS61
KCNIP3	Q9Y2W7
KCNK7	Q9Y2U2
KCNN4	O15554
KCNU1	A8MYU2
KCP
KDELC1	Q6UW63
KDELC2	Q7Z4H8
KDM1A	O60341
KDM3B	Q7LBC6
KDM6A	O15550
KDM7A	Q6ZMT4
KDSR	Q06136
KERA	O60938
KIAA0100	Q14667
KIAA0319	Q5VV43
KIAA1324	Q6UXG2
KIFC2	Q96AC6
KIR2DL4	Q99706
KIR3DX1
KIRREL2	Q6UWL6
KISS1	Q15726
KLHL11	Q9NVR0
KLHL22	Q53GT1
KLK1	P06870
KLK10	O43240
KLK11	Q9UBX7
KLK12	Q9UKR0
KLK13	Q9UKR3
KLK14	Q9P0G3
KLK15	Q9H2R5
KLK2	P20151
KLK3	P07288
KLK4	Q9Y5K2
KLK5	Q9Y337
KLK6	Q92876
KLK7	P49862
KLK8	O60259
KLK9	Q9UKQ9
KLKB1	P03952
KMT5A	Q9NQR1
KNDC1	Q76NI1
KNG1	P01042
KRBA2	Q6ZNG9
KREMEN2	Q8NCW0
KRTDAP	P60985
L1CAM	P32004
L3MBTL2	Q969R5
LACRT	Q9GZZ8
LACTB	P83111
LAG3	P18627
LAIR2	Q6ISS4
LALBA	P00709
LAMA1	P25391
LAMA2	P24043
LAMA3	Q16787
LAMA4	Q16363
LAMA5	O15230
LAMB1	P07942
LAMB2	P55268
LAMB3	Q13751
LAMB4	A4D0S4
LAMC1	P11047
LAMC2	Q13753
LAMC3	Q9Y6N6
LAMP3	Q9UQV4
LARGE2	Q8N3Y3
LAT	O43561
LAT2	Q9GZY6
LBP	P18428
LCAT	P04180
LCN1	P31025
LCN10	Q6JVE6
LCN12	Q6JVE5
LCN15	Q6UWW0
LCN2	P80188
LCN6	P62502
LCN8	Q6JVE9
LCN9	Q8WX39
LCORL	Q8N3X6
LDLR	P01130
LDLRAD2	Q5SZI1
LEAP2	Q969E1
LECT2	O14960
LEFTY1	O75610
LEFTY2	O00292
LEP	P41159
LFNG	Q8NES3
LGALS3BP	Q08380
LGI1	O95970
LGI2	Q8N0V4
LGI3	Q8N145
LGI4	Q8N135
LGMN	Q99538
LGR4	Q9BXB1
LHB	P01229
LHCGR	P22888
LIF	P15018
LIFR	P42702
LILRA2	Q8N149
LILRB3	O75022
LIME1	Q9H400
LINGO1	Q96FE5
LIPA	P38571
LIPC	P11150
LIPF	P07098
LIPG	Q9Y5X9
LIPH	Q8WWY8
LIPK	Q5VXJ0
LIPM	Q5VYY2
LIPN	Q5VXI9
LMAN2	Q12907
LMNTD1	Q8N9Z9
LNX1	Q8TBB1
LOX	P28300
LOXL1	Q08397
LOXL2	Q9Y4K0
LOXL3	P58215
LOXL4	Q96JB6
LPA	P08519
LPL	P06858
LPO	P22079
LRAT	O95237
LRCH3	Q96II8
LRCOL1	A6NCL2
LRFN4	Q6PJG9
LRFN5	Q96NI6
LRG1	P02750
LRP1	Q07954
LRP11	Q86VZ4
LRP1B	Q9NZR2
LRP2	P98164
LRP4	O75096
LRPAP1	P30533
LRRC17	Q8N6Y2
LRRC32	Q14392
LRRC3B	Q96PB8
LRRC4B	Q9NT99
LRRC70	Q7Z2Q7
LRRN3	Q9H3W5
LRRTM1	Q86UE6
LRRTM2	O43300
LRRTM4	Q86VH4
LRTM2	Q8N967
LSR	Q86X29
LST1	O00453
LTA	P01374
LTBP1	Q14766
LTBP2	Q14767
LTBP3	Q9NS15
LTBP4	Q8N2S1
LTBR	P36941
LTF	P02788
LTK	P29376
LUM	P51884
LUZP2	Q86TE4
LVRN	Q6Q4G3
LY6E	Q16553
LY6G5B	Q8NDX9
LY6G6D	O95868
LY6G6E
LY6H	O94772
LY6K	Q17RY6
LY6L	H3BQJ8
LY86	O95711
LY96	Q9Y6Y9
LYG1	Q8N1E2
LYG2	Q86SG7
LYNX1	P0DP58
LYNX1-SLURP2
LYPD1	Q8N2G4
LYPD2	Q6UXB3
LYPD4	Q6UWN0
LYPD6	Q86Y78
LYPD6B	Q8NI32
LYPD8	Q6UX82
LYZ	P61626
LYZL4	Q96KX0
LYZL6	O75951
M6PR	P20645
MAD1L1	Q9Y6D9
MAG	P20916
MAGT1	Q9H0U3
MALSU1	Q96EH3
MAMDC2	Q7Z304
MAN2B1	O00754
MAN2B2	Q9Y2E5
MANBA	O00462
MANEAL	Q5VSG8
MANF
MANSC1	Q9H8J5
MAP3K9	P80192
MARCOL
MASP1	P48740
MASP2	O00187
MATN1	P21941
MATN2	O00339
MATN3	O15232
MATN4	O95460
MATR3	P43243
MATR3
MAU2	Q9Y6X3
MAZ	P56270
MBD6	Q96DN6
MBL2	P11226
MBNL1	Q9NR56
MCCC1	Q96RQ3
MCCD1	P59942
MCEE	Q96PE7
MCF2L	O15068
MCFD2	Q8NI22
MDFIC	Q9P1T7
MDGA1	Q8NFP4
MDK	P21741
MED20	Q9H944
MEGF10	Q96KG7
MEGF6	O75095
MEI1	Q5TIA1
MEI4	A8MW99
MEIS1	O00470
MEIS3	Q99687
MELTF	P08582
MEPE	Q9NQ76
MESD	Q14696
MEST	Q5EB52
MET	P08581
METRN	Q9UJH8
METRNL	Q641Q3
METTL17	Q9H7H0
METTL24	Q5JXM2
METTL7B	Q6UX53
METTL9	Q9H1A3
MEX3C	Q5U5Q3
MFAP2	P55001
MFAP3	P55082
MFAP3L	O75121
MFAP4	P55083
MFAP5	Q13361
MFGE8	Q08431
MFNG	O00587
MGA	Q8IWI9
MGAT2	Q10469
MGAT3	Q09327
MGAT4A	Q9UM21
MGAT4B	Q9UQ53
MGAT4D	A6NG13
MGP	P08493
MGST2	Q99735
MIA	Q16674
MIA3	Q5JRA6
MICU1	Q9BPX6
MIER1	Q8N108
MINPP1	Q9UNW1
MLEC	Q14165
MLN	P12872
MLXIP	Q9HAP2
MLXIPL	Q9NP71
MMP1	P03956
MMP10	P09238
MMP11	P24347
MMP12	P39900
MMP13	P45452
MMP14	P50281
MMP17	Q9ULZ9
MMP19	Q99542
MMP2	P08253
MMP20	O60882
MMP21	Q8N119
MMP25	Q9NPA2
MMP26	Q9NRE1
MMP27	Q9H306
MMP28	Q9H239
MMP3	P08254
MMP7	P09237
MMP8	P22894
MMP9	P14780
MMRN1	Q13201
MMRN2	Q9H8L6
MOXD1	Q6UVY6
MPIG6B	O95866
MPL	P40238
MPO	P05164
MPPED1	O15442
MPZL1	O95297
MR1	Q95460
MRPL2	Q5T653
MRPL21	Q7Z2W9
MRPL22	Q9NWU5
MRPL24	Q96A35
MRPL27	Q9P0M9
MRPL32	Q9BYC8
MRPL34	Q9BQ48
MRPL35	Q9NZE8
MRPL52	Q86TS9
MRPL55	Q7Z7F7
MRPS14	O60783
MRPS22	P82650
MRPS28	Q9Y2Q9
MS4A14	Q96JA4
MS4A3	Q96HJ5
MSH3	P20585
MSH5	O43196
MSLN	Q13421
MSMB	P08118
MSRA	Q9UJ68
MSRB2	Q9Y3D2
MSRB3	Q8IXL7
MST1
MSTN	O14793
MT1G	P13640
MTHFD2	P13995
MTMR14	Q8NCE2
MTRNR2L11	S4R3Y5
MTRR	Q9UBK8
MTTP	P55157
MTX2	O75431
MUC1	P15941
MUC13	Q9H3R2
MUC20	Q8N307
MUC3A	Q02505
MUC5AC	P98088
MUC5B	Q9HC84
MUC6	Q6W4X9
MUC7	Q8TAX7
MUCL1	Q96DR8
MXRA5	Q9NR99
MXRA7	P84157
MYDGF	Q969H8
MYL1	P05976
MYMX	A0A1B0GTQ4
MYOC	Q99972
MYRFL	Q96LU7
MZB1	Q8WU39
N4BP2L2	Q92802
NAA38	Q9BRA0
NAAA	Q02083
NAGA	P17050
NAGLU	P54802
NAGS	Q8N159
NAPSA	O96009
NAXE	Q8NCW5
NBL1	P41271
NBPF26
NCAM1	P13591
NCAN	O14594
NCBP2-AS2	Q69YL0
NCSTN	Q92542
NDNF	Q8TB73
NDP	Q00604
NDUFA10	O95299
NDUFB5	O43674
NDUFS8	O00217
NDUFV1	P49821
NECAB3	Q96P71
NECTIN1	Q15223
NELL1	Q92832
NELL2	Q99435
NENF	Q9UMX5
NETO1	Q8TDF5
NFASC	O94856
NFE2L1	Q14494
NFE2L3	Q9Y4A8
NGEF	Q8N5V2
NGF	P01138
NGLY1	Q96IV0
NGRN	Q9NPE2
NHLRC3	Q5JS37
NID1	P14543
NID2	Q14112
NKG7	Q16617
NLGN3	Q9NZ94
NLGN4X	Q8N0W4
NLGN4Y	Q8NFZ3
NLRP5	P59047
NMB	P08949
NME1	P15531
NME1-NME2
NME3	Q13232
NMS	Q5H8A3
NMU	P48645
NOA1	Q8NC60
NODAL	Q96S42
NOG	Q13253
NOMO3	P69849
NOTCH3	Q9UM47
NOTUM	Q6P988
NOV	P48745
NPB	Q8NG41
NPC2	P61916
NPFF	O15130
NPFFR2	Q9Y5X5
NPHS1	O60500
NPNT	Q6UXI9
NPPA	P01160
NPPB	P16860
NPPC	P23582
NPS	P0C0P6
NPTX1	Q15818
NPTX2	P47972
NPTXR	O95502
NPVF	Q9HCQ7
NPW	Q8N729
NPY	P01303
NQO2	P16083
NRCAM	Q92823
NRG1	Q02297
NRN1L	Q496H8
NRP1	O14786
NRP2	O60462
NRTN	Q99748
NRXN1	P58400, Q9ULB1
NRXN2	P58401, Q9P2S2
NT5C3A	Q9H0P0
NT5DC3	Q86UY8
NT5E	P21589
NTF3	P20783
NTF4	P34130
NTM	Q9P121
NTN1	O95631
NTN3	O00634
NTN4	Q9HB63
NTN5	Q8WTR8
NTNG1	Q9Y2I2
NTNG2	Q96CW9
NTS	P30990
NUBPL	Q8TB37
NUCB1	Q02818
NUCB2
NUDT19	A8MXV4
NUDT9	Q9BW91
NUP155	O75694
NUP214	P35658
NUP85	Q9BW27
NXPE3	Q969Y0
NXPE4	Q6UWF7
NXPH1	P58417
NXPH2	O95156
NXPH3	O95157
NXPH4	O95158
NYX	Q9GZU5
OAF	Q86UD1
OBP2A	Q9NY56
OBP2B	Q9NPH6
OC90	Q02509
OCLN	Q16625
ODAM	A1E959
ODAPH	Q17RF5
OGG1	O15527
OGN	P20774
OIT3	Q8WWZ8
OLFM1	Q99784
[truncated: 944 more rows]

## Sheet: SignalP
Gene (SignalP)	Uniprot		Gene name in threshold	IDs in threshold			Genes found in SignalP and threshold
A1BG	P04217		ATP5F1A	K7EJP1			FN1
A2M	P01023			K7EK77			PRDX4
A2ML1	A8K2U0			K7ENJ4			TXNDC12
AADACL2	Q6P093			K7EQH4
ABAT	P80404			K7ERX7
ABHD1	Q96SE0			P25705
ABHD10	Q9NUJ1			P25705-2
ABHD14A-ACY1			CNN2	A0A087X271
ABHD15	Q6UXT9			B4DDF4
ABI3BP	Q7Z7G0			B4DUT8
AC004233.2				H3BVI6
AC006518.7				K7ES69
AC008687.1				Q99439
AC009086.2				Q99439-2
AC073896.1			EWSR1	A0A0D9SFL3
AC079341.3				B0QYK0
AC092718.8				C9JGE3
AC114490.3				H7BY36
AC118470.1				Q01844
AC126283.2				Q01844-2
AC135050.2				Q01844-3
AC136352.3				Q01844-5
AC136428.1				Q01844-6
AC233755.1	P0DP08		FN1	H0Y4K8
AC243967.1				H0Y7Z1
ACACB	O00763			P02751
ACAN				P02751-10
ACE	P12821			P02751-11
ACHE	P22303			P02751-12
ACP2	P11117			P02751-13
ACP5	P13686			P02751-14
ACP7	Q6ZNF0			P02751-15
ACR	P10323			P02751-17
ACRBP	Q8NEB7			P02751-3
ACRV1	P26436			P02751-4
ACTL10	Q5JWF8			P02751-5
ACTR3C	Q9C0K3			P02751-6
ACVR1	Q04771			P02751-7
ACVR1C	Q8NER5			P02751-8
ACVRL1	P37023			P02751-9
ACYP1	P07311		H2AC11; H2AC13; H2AC15; H2AC16; H2AC17	P0C0S8
ADA2	Q9NZK5		H2AC20	Q16777
ADAM10	O14672		H2AC4; H2AC8	P04908
ADAM12	O43184		H2AC6	Q93077
ADAM15	Q13444		H2AC7	P20671
ADAM17	P78536		H2AJ	H0YFX9
ADAM18	Q9Y3Q7			Q9BTM1
ADAM22	Q9P0K1			Q9BTM1-2
ADAM28	Q9UKQ2		H2AW	Q7L7L0
ADAM29	Q9UKF5		H2AX	P16104
ADAM32	Q8TC27		H2AZ2	C9J0D1
ADAM33	Q9BZ11			C9J386
ADAM7	Q9H2U9			Q71UI9
ADAM8	P78325			Q71UI9-2
ADAM9	Q13443			Q71UI9-3
ADAMDEC1	O15204			Q71UI9-4
ADAMTS1	Q9UHI8			Q71UI9-5
ADAMTS10	Q9H324		KRT8	F8VP67
ADAMTS12	P58397			F8VUG2
ADAMTS14	Q8WXS8			F8W1U3
ADAMTS15	Q8TE58			P05787
ADAMTS16	Q8TE57			P05787-2
ADAMTS17	Q8TE56		LSM3	P62310
ADAMTS18	Q8TE60		MYL6B	F8W1I5
ADAMTS19	Q8TE59			P14649
ADAMTS2	O95450		NUCKS1	Q9H1E3
ADAMTS20	P59510			Q9H1E3-2
ADAMTS3	O15072		PEA15	B1AKZ5
ADAMTS5	Q9UNA0			Q15121
ADAMTS6	Q9UKP5			Q15121-2
ADAMTS7	Q9UKP4		PRDX4	H7C3T4
ADAMTS8	Q9UP79			Q13162
ADAMTS9	Q9P2N4		PSMB6	P28072
ADAMTSL1	Q8N6G6		RPS15	A0A0B4J2B4
ADAMTSL2	Q86TH1			K7EJ78
ADAMTSL3	P82987			K7ELC2
ADAMTSL4	Q6UY14			K7EM56
ADAMTSL5				K7EQJ5
ADCYAP1	P18509			P62841
ADCYAP1R1	P41586			S4R417
ADGRA3	Q8IWK6			S4R456
ADGRB2	O60241		SEPTIN11	D6RDU5
ADGRE3	Q9BY15			D6RER5
ADGRE5	P48960			D6RGI3
ADGRF1	Q5T601			Q9NVA2
ADGRG1	Q9Y653			Q9NVA2-2
ADGRG5	Q8IZF4		SEPTIN6	B1AMS2
ADGRG6	Q86SQ4			Q14141
ADGRV1	Q8WXG9			Q14141-2
ADI1	Q9BV57			Q14141-3
ADIG	Q0VDE8			Q14141-4
ADIPOQ	Q15848		SEPTIN7	A0A0U1RRE1
ADM	P35318			A0A0U1RRH9
ADM2	Q7Z4H4			E7EPK1
ADM5	C9JUS6			E7ES33
ADPGK	Q9BRR6			G3V1Q4
AEBP1	Q8IUX7			Q16181
AFM	P43652			Q16181-2
AFP	P02771		SEPTIN8	A0A087X142
AGA	P20933			A6NFQ9
AGER	Q15109			A6NMH6
AGR2	O95994			C9JV02
AGR3	Q8TD06			F8W8I8
AGRN	O00468			Q92599
AGRP	O00253			Q92599-2
AGT	P01019			Q92599-3
AGTRAP	Q6RW13			Q92599-4
AHCYL2	Q96HN2		SFN	P31947
AHSG	P02765			P31947-2
AIG1	Q9NVV5		SPTAN1	A0A0D9SF54
AKAP10	O43572			A0A0D9SGF6
AL049629.2				Q13813
AL049634.2				Q13813-2
AL160272.2				Q13813-3
AL163195.3			SRSF2	J3KP15
AL354761.1				J3QL05
AL645922.1				Q01130
AL645941.2				Q01130-2
AL662899.1			TXN	P10599
AL929554.1				P10599-2
ALAS2	P22557		TXNDC12	O95881
ALB	P02768		YWHAB	A0A0J9YWE8
ALG1	Q9BT22			A0A0J9YWZ2
ALG9	Q9H6U8			P31946
ALKAL1	Q6UXT8			P31946-2
ALKAL2	Q6UX46			Q4VY19
ALPI	P09923			Q4VY20
ALPL	P05186		YWHAG	P61981
ALPP	P05187		YWHAH	A2IDB2
ALPPL2	P10696			Q04917
AMBN	Q9NP70
AMBP	P02760
AMELX	Q99217
AMELY	Q99218
AMH	P03971
AMTN	Q6UX39
AMY1A	P04745
AMY1B	P04745
AMY1C	P04745
AMY2A	P04746
AMY2B	P19961
ANG	P03950
ANGEL1	Q9UNK9
ANGPT1	Q15389
ANGPT2	O15123
ANGPT4	Q9Y264
ANGPTL1	O95841
ANGPTL2	Q9UKU9
ANGPTL3	Q9Y5C1
ANGPTL4	Q9BY76
ANGPTL5	Q86XS5
ANGPTL6	Q8NI99
ANGPTL7	O43827
ANGPTL8	Q6UXH0
ANK1	P16157
ANKDD1A	Q495B1
ANKRD54	Q6NXT1
ANOS1	P23352
ANTXR1	Q9H6X2
AOAH	P28039
AOC1	P19801
AOC2	O75106
AP000790.3
AP000790.4
AP002347.1
APCDD1	Q8J025
APCS	P02743
APELA	P0DMC3
APLN	Q9ULZ1
APLP2	Q06481
APOA1	P02647
APOA2	P02652
APOA4	P06727
APOA5	Q6Q788
APOB	P04114
APOC1	P02654
APOC2	P02655
APOC3	P02656
APOC4	P55056
APOD	P05090
APOE	P02649
APOF	Q13790
APOH	P02749
APOL1	O14791
APOL3	O95236
APOL4	Q9BPW4
APOM	O95445
ARHGAP36	Q6ZRI8
ARHGAP45	Q92619
ARHGDIG	Q99819
ARMC5	Q96C12
ARSA	P15289
ARSB	P15848
ARSE	P51690
ARSI	Q5FYB1
ARSK	Q6UWY0
ART3	Q13508
ART4	Q93070
ART5	Q96L15
ARTN	Q5T4W7
ASAH1	Q13510
ASAH2	Q9NR71
ASIP	P42127
ASPN	Q9BXN1
ASTL	Q6HA08
ATAT1	Q5SQI0
ATG5	Q9H1Y0
ATP13A1	Q9HD20
ATP6AP1	Q15904
ATP6AP2	O75787
AVP	P01185
AZGP1	P25311
AZU1	P20160
B2M	P61769
B3GALNT2	Q8NCR0
B3GLCT	Q6Y288
B3GNT8	Q7Z7M8
B3GNT9	Q6UX72
B4GALNT1	Q00973
B4GALT4	O60513
B9D1	Q9UPM9
BACE2	Q9Y5Z0
BAG6	P46379
BCAM	P50895
BCAN	Q96GW7
BCAR1	P56945
BCHE	P06276
BCKDHB	P21953
BCO2	Q9BYV7
BDNF	P23560
BGLAP	P02818
BGN	P21810
BMP1	P13497
BMP10	O95393
BMP15	O95972
BMP2	P12643
BMP3	P12645
BMP4	P12644
BMP6	P22004
BMP7	P18075
BMP8A	Q7Z5Y6
BMP8B	P34820
BMPER	Q8N8U9
BNC1	Q01954
BOC	Q9BWV1
BOLA1	Q9Y3E2
BPI	P17213
BPIFA1	Q9NP55
BPIFA2	Q96DR5
BPIFA3	Q9BQP9
BPIFB1	Q8TDL5
BPIFB2	Q8N4F0
BPIFB3	P59826
BPIFB4	P59827
BPIFB6	Q8NFQ5
BPIFC	Q8NFQ6
BRINP1	O60477
BRINP2	Q9C0B6
BRINP3	Q76B58
BSG	P35613
BST1	Q10588
BTBD17	A6NE02
BTD	P43251
BTN2A2	Q8WVV5
BTN3A1	O00481
BTN3A2	P78410
BTN3A3	O00478
BX088645.1
BX248415.1
C10orf99	Q6UWK7
C11orf1	Q9H5F2
C11orf24	Q96F05
C11orf94	C9JXX5
C12orf10	Q9HB07
C12orf73	Q69YU5
C12orf76	Q8N812
C16orf89	Q6UX73
C16orf90	A8MZG2
C17orf58	Q2M2W7
C17orf67	Q0P5P2
C17orf75	Q9HAS0
C17orf99	Q6UX52
C19orf47	Q8N9M1
C19orf70	Q5XKP0
C1orf127
C1orf159	Q96HA4
C1orf54	Q8WWF1
C1orf56	Q9BUN1
C1QA	P02745
C1QB	P02746
C1QC	P02747
C1QL1	O75973
C1QL2	Q7Z5L3
C1QL3	Q5VWW1
C1QL4	Q86Z23
C1QTNF1	Q9BXJ1
C1QTNF12	Q5T7M4
C1QTNF3	Q9BXJ4
C1QTNF4	Q9BXJ3
C1QTNF5	Q9BXJ0
C1QTNF7	Q9BXJ2
C1QTNF8	P60827
C1QTNF9	P0C862
C1QTNF9B	B2RNN3
C1R	P00736
C1RL	Q9NZP8
C1S	P09871
C2	P06681
C20orf173	Q96LM9
C20orf204
C21orf33	P30042
C21orf62	Q9NYP8
C2orf40	Q9H1Z8
C2orf66	Q6UXQ4
C2orf69	Q8N8R5
C2orf92
C3	P01024
C3orf33	Q6P1S2
C3orf85
C4A	P0C0L4
C4B	P0C0L5
C4BPB	P20851
C4orf48	Q5BLP8
C5	P01031
C5orf46	Q6UWT4
C6	P13671
C6orf120	Q7Z4R8
C6orf15	Q6UXA7
C6orf58	Q6P5S2
C7	P10643
C7orf57	Q8NEG2
C8A	P07357
C8B	P07358
C8G	P07360
C9	P02748
C9orf47	Q6ZRZ4
CA10	Q9NS85
CA11	O75493
CA6	P23280
CA9	Q16790
CACNA2D1	P54289
CADM3	Q8N126
CALCA	P01258, P06881
CALCB	P10092
CALCR
CALCRL	Q16602
CALHM4	Q5JW98
CALR	P27797
CALR3	Q96L12
CALU	O43852
CANX	P27824
CARTPT	Q16568
CASQ1	P31415
CASQ2	O14958
CATSPERB	Q9H7T0
CBLN1	P23435
CBLN2	Q8IUK8
CBLN3	Q6UW01
CBLN4	Q9NTU7
CCBE1	Q6UXH8
CCDC112	Q8NEF3
CCDC129	Q6ZRS4
CCDC134	Q9H6E4
CCDC149	Q6ZUS6
CCDC3	Q9BQI4
CCDC80	Q76M96
CCDC88B	A6NC98
CCER2	I3L3R5
CCK	P06307
CCL1	P22362
CCL11	P51671
CCL13	Q99616
CCL14	Q16627
CCL15	Q16663
CCL16	O15467
CCL17	Q92583
CCL18	P55774
CCL19	Q99731
CCL2	P13500
CCL20	P78556
CCL21	O00585
CCL22	O00626
CCL23	P55773
CCL24	O00175
CCL25	O15444
CCL26	Q9Y258
CCL27	Q9Y4X3
CCL28	Q9NRJ3
CCL3	P10147
CCL3L1	P16619
CCL4	P13236
CCL4L2	Q8NHW4
CCL5	P13501
CCL7	P80098
CCL8	P80075
CCNB1IP1	Q9NPC3
CD14	P08571
CD160	O95971
CD164	Q04900
CD177
CD1E	P15812
CD2	P06729
CD200	P41217
CD200R1	Q8TD46
CD22	P20273
CD226	Q15762
CD24
CD276	Q5ZPR3
CD300A	Q9UGN4
CD300LB	A8K4G0
CD300LF	Q8TDQ1
CD300LG	Q6UXG3
CD3D	P04234
CD4	P01730
CD40	P25942
CD44	P16070
CD48	P09326
CD5	P06127
CD55	P08174
CD59	P13987
CD5L	O43866
CD6	P30203
CD68	P34810
CD7	P09564
CD79A	P11912
CD80	P33681
CD86	P42081
CD8A	P01732
CD8B	P10966
CD99	P14209
CDC45	O75419
CDCP1	Q9H5V8
CDCP2	Q5VXM1
CDH1	P12830
CDH11	P55287
CDH13	P55290
CDH17	Q12864
CDH18	Q13634
CDH19	Q9H159
CDH23	Q9H251
CDH5	P33151
CDHR1	Q96JP9
CDHR4	A6H8M9
CDHR5	Q9HBB8
CDNF	Q49AH0
CDON	Q4KMG0
CDSN
CEACAM16	Q2WEN9
CEACAM18	A8MTB9
CEACAM19	Q7Z692
CEACAM5	P06731
CEACAM7	Q14002
CEACAM8	P31997
CEL
CELA2A	P08217
CELA2B	P08218
CELA3A	P09093
CELA3B	P08861
CEMIP	Q8WUJ3
CER1	O95813
CERCAM	Q5T4B2
CERS1	P27544
CES1	P23141
CES3	Q6UWW8
CES4A	Q5XG92
CES5A	Q6NT32
CETP	P11597
CFB	P00751
CFC1	P0CG37
CFC1B	P0CG36
CFD	P00746
CFH	P08603
CFHR1	Q03591
CFHR2	P36980
CFHR3	Q02985
CFHR4	Q92496
CFHR5	Q9BXR6
CFI	P05156
CFP	P27918
CGA	P01215
CGB1	A6NKQ9
CGB2
CGB3	P0DN86
CGB5	P0DN86
CGB7	P0DN87
CGB8	P0DN86
CGREF1	Q99674
CHAD	O15335
CHADL	Q6NUI6
CHGA	P10645
CHGB	P05060
CHI3L1	P36222
CHI3L2	Q15782
CHIA	Q9BZP6
CHID1	Q9BWS9
CHIT1	Q13231
CHL1	O00533
CHN1	P15882
CHPF2	Q9P2E5
CHRD	Q9H2X0
CHRDL1	Q9BU40
CHRDL2	Q6WN34
CHRNA2	Q15822
CHRNA5	P30532
CHRNB1	P11230
CHRND	Q07001
CHST1	O43916
CHST10	O43529
CHST13	Q8NET6
CHST6	Q9GZX3
CHST7	Q9NS84
CHSY1	Q86X52
CILP	O75339
CILP2	Q8IUL8
CLCA1	A8K7I4
CLCF1	Q9UBD9
CLDN7	O95471
CLEC11A	Q9Y240
CLEC18A	A5D8T8
CLEC18B	Q6UXF7
CLEC18C	Q8NCF0
CLEC19A	Q6UXS0
CLEC20A
CLEC3A
CLEC3B	P05452
CLGN	O14967
CLN5	O75503
CLPS	P04118
CLPSL1	A2RUU4
CLPSL2	Q6UWE3
CLRN1	P58418
CLSTN3	Q9BQT9
CLU	P10909
CLUL1	Q15846
CMA1	P23946
CMPK1	P30085
CNDP1	Q96KN2
CNGA4	Q8IV77
CNPY2	Q9Y2B0
CNPY3	Q9BT09
CNPY4	Q8N129
CNTFR	P26992
CNTN1	Q12860
CNTN2	Q02246
CNTN3	Q9P232
CNTN4	Q8IWV2
CNTN5	O94779
CNTNAP2	Q9UHC6
CNTNAP3	Q9BZ76
CNTNAP3B	Q96NU0
COASY	Q13057
COCH	O43405
COL10A1	Q03692
COL11A2	P13942
COL12A1	Q99715
COL15A1	P39059
COL16A1	Q07092
COL18A1	P39060
COL19A1	Q14993
COL1A1	P02452
COL1A2	P08123
COL20A1	Q9P218
COL21A1	Q96P44
COL22A1	Q8NFW1
COL24A1	Q17RW2
COL26A1	Q96A83
COL27A1	Q8IZC6
COL28A1	Q2UY09
COL2A1	P02458
COL3A1	P02461
COL4A1	P02462
COL4A2	P08572
COL4A3	Q01955
COL4A5	P29400
COL4A6	Q14031
COL5A1	P20908
COL5A2	P05997
COL5A3	P25940
COL6A1	P12109
COL6A2	P12110
COL6A3	P12111
COL6A5
COL6A6	A6NMZ7
COL7A1	Q02388
COL8A1	P27658
COL8A2	P25067
COL9A1	P20849
COL9A2	Q14055
COL9A3	Q14050
COLEC10	Q9Y6Z7
COLEC11	Q9BWP8
COLGALT1	Q8NBJ5
COLGALT2	Q8IYK4
COLQ	Q9Y215
COMP	P49747
CORT	O00230
CP	P00450
CPA1	P15085
CPA2	P48052
CPA3	P15088
CPA4	Q9UI42
CPA6	Q8N4T0
CPAMD8	Q8IZJ3
CPB1	P15086
CPB2	Q96IY4
CPE	P16870
CPM	P14384
CPN1	P15169
CPN2	P22792
CPO	Q8IVL8
CPQ	Q9Y646
CPVL	Q9H3G5
CPXM1	Q96SM3
CPXM2	Q8N436
CPZ	Q66K79
CR1L	Q2VPA4
CRB1	P82279
CRB2	Q5IJ48
CREG1	O75629
CREG2	Q8IUH2
CRELD1	Q96HD1
CRELD2	Q6UXH1
CRH	P06850
CRHBP	P24387
CRHR1	P34998
CRHR2	Q13324
CRISP1	P54107
CRISP2	P16562
CRISP3	P54108
CRISPLD2	Q9H0B8
CRLF1	O75462
CRP	P02741
CRTAC1	Q9NQ79
CRTAP	O75718
CRY2	Q49AN0
CSAD	Q9Y600
CSF1	P09603
CSF1R	P07333
CSF2	P04141
CSF2RA	P15509
CSF3	P09919
CSH1	P0DML2
CSH2	P0DML3
CSHL1	Q14406
CSN1S1	P47710
CSN2	P05814
CSN3	P07498
CST1	P01037
CST11	Q9H112
CST2	P09228
CST3	P01034
CST4	P01036
CST5	P28325
CST6	Q15828
CST7	O76096
CST8	O60676
CST9	Q5W186
CST9L	Q9H4G1
CSTL1	Q9H114
CT55	Q8WUE5
CTAGE5	O15320, Q96PC5
CTBS	Q01459
CTC1	Q2NKJ3
CTGF	P29279
CTHRC1	Q96CG8
CTNS	O60931
CTRB1	P17538
CTRB2	Q6GPI1
CTRC	Q99895
CTRL	P40313
CTSA	P10619
CTSB	P07858
CTSC	P53634
CTSD	P07339
CTSE	P14091
CTSF	Q9UBX1
CTSG	P08311
CTSH	P09668
CTSK	P43235
CTSL	P07711
CTSO	P43234
CTSS	P25774
CTSV	O60911
CTSW	P56202
CTSZ	Q9UBR2
CUBN	O60494
CUTA	O60888
CX3CL1	P78423
CXADR	P78310
CXCL1	P09341
CXCL10	P02778
CXCL11	O14625
CXCL12	P48061
CXCL13	O43927
CXCL14	O95715
CXCL17	Q6UXB2
CXCL2	P19875
CXCL3	P19876
CXCL5	P42830
CXCL6	P80162
CXCL8	P10145
CXCL9	Q07325
CXorf36	Q9H7Y0
CYHR1	Q6ZMK1
CYP17A1	P05093
CYP20A1	Q6UW02
CYP2A6	P11509
CYP2A7	P20853
CYP2B6	P20813
CYP2C18	P33260
CYP2C19	P33261
CYP2C8	P10632
CYP2C9	P11712
CYP2E1	P05181
CYP2F1	P24903
CYP2S1	Q96SQ9
CYP2W1	Q8TAV3
CYP46A1	Q9Y6A2
CYP4F11	Q9HBI6
CYP4F2	P78329
CYR61	O00622
CYTL1	Q9NRR1
D2HGDH	Q8N465
DAG1	Q14118
DAND5	Q8N907
DBH	P09172
DCD	P81605
DCN	P07585
DDIAS	Q8IXT1
DDOST	P39656
DDR1	Q08345
DDR2	Q16832
DDT	P30046
DDX17	Q92841
DDX20	Q9UHI6
DDX28	Q9NUL7
DEFA1	P59665
DEFA1B	P59665
DEFA3	P59666
DEFA4	P12838
DEFA5	Q01523
DEFA6	Q01524
DEFB1	P60022
DEFB103A	P81534
DEFB103B	P81534
DEFB104A	Q8WTQ1
DEFB104B	Q8WTQ1
DEFB105A	Q8NG35
DEFB105B	Q8NG35
DEFB106A	Q8N104
DEFB106B	Q8N104
DEFB107A	Q8IZN7
DEFB107B	Q8IZN7
DEFB108B	Q8NET1
DEFB110	Q30KQ9
DEFB113	Q30KQ7
DEFB114	Q30KQ6
DEFB115	Q30KQ5
DEFB116	Q30KQ4
DEFB118	Q96PH6
DEFB119	Q8N690
DEFB121	Q5J5C9
DEFB123	Q8N688
DEFB124	Q8NES8
DEFB125	Q8N687
DEFB126	Q9BYW3
DEFB127	Q9H1M4
DEFB128	Q7Z7B8
DEFB129	Q9H1M3
DEFB130A	P0DP74
DEFB130B	P0DP73
DEFB131A	P59861
DEFB131B	A0A096LNP1
DEFB132	Q7Z7B7
DEFB133	Q30KQ1
DEFB134	Q4QY38
DEFB135	Q30KP9
DEFB136	Q30KP8
DEFB4A	O15263
DEFB4B	O15263
DHH	O43323
DHRS7	Q9Y394
DHRS7C	A6NNS2
DHRS9	Q9BPW9
DIO2	Q92813
DKK1	O94907
DKK2	Q9UBU2
DKK3	Q9UBP4
DKK4	Q9UBT3
DKKL1	Q9UK85
DLG4	P78352
DLK1	P80370
DLL1	O00548
DLL3	Q9NYJ7
DMBT1	Q9UGM3
DMKN	Q6E0U4
DMP1	Q13316
DNAH14	Q0VDD8
DNAJB11	Q9UBS4
DNAJB9	Q9UBS3
DNAJC25-GNG10
DNAJC3	Q13217
DNASE1	P24855
DNASE1L1	P49184
DNASE1L2	Q92874
DNASE1L3	Q13609
DNASE2	O00115
DNASE2B	Q8WZ79
DPEP1	P16444
DPEP2	Q9H4A9
DPEP3	Q9H4B8
DPH1	Q9BZG8
DPP7	Q9UHL4
DPT	Q07507
DRAXIN	Q8NBI3
DSE	Q9UL01
DSG2	Q14126
DSPP	Q9NZW4
DUOX1	Q9NRD9
DYNLT3	P51808
E2F5	Q15329
EBAG9	O00559
EBF4	Q9BQW3
EBI3	Q14213
ECM1	Q16610
ECM2	O94769
ECSIT	Q9BQ95
EDDM3B	P56851
EDEM2	Q9BV94
EDIL3	O43854
EDN1	P05305
EDN2	P20800
EDN3	P14138
EFEMP1	Q12805
EFEMP2	O95967
EFNA1	P20827
EFNA2	O43921
EFNA4	P52798
EGFL6	Q8IUX8
EGFL7	Q9UHF1
EGFL8	Q99944
EGFLAM	Q63HQ2
EGFR	P00533
EHF	Q9NZC4
EIF2AK1	Q9BQI3
ELANE	P08246
ELN	P15502
ELP2	Q6IA86
ELSPBP1	Q96BH3
EMC10	Q5UCC4
EMC9	Q9Y3B6
EMCN	Q9ULC0
EMID1	Q96A84
EMILIN1	Q9Y6C2
EMILIN2	Q9BXX0
EMILIN3	Q9NT22
ENDOU	P21128
ENHO	Q6UWT2
ENPP6	Q6UWR7
ENPP7	Q6UWV6
ENTPD5	O75356
ENTPD8	Q5MY95
EOGT	Q5NDL2
EPCAM	P16422
EPGN	Q6UW88
EPHA10	Q5JZY3
EPHA3	P29320
EPHA4	P54764
EPHA7	Q15375
EPHA8	P29322
EPHB2	P29323
EPHB4	P54760
EPHX1	P07099
EPO	P01588
EPPIN	O95925
EPPIN-WFDC6	O95925
EPS8L1	Q8TE68
EPX	P11678
EPYC	Q99645
EQTN	Q9NQ60
ERAP1	Q9NZ08
ERBB3	P21860
ERFE	Q4G0M1
ERLEC1	Q96DZ1
ERLIN2	O94905
ERN1	O75460
ERN2	Q76MJ5
ERO1A	Q96HE7
ERO1B	Q86YB8
ERP27	Q96DN0
ERP29	P30040
ERP44	Q9BS26
ERV3-1	Q14264
ESM1	Q9NQ30
ETNK2	Q9NVF9
EXTL2	Q9UBQ6
F10	P00742
F11	P03951
F12	P00748
F13B	P05160
F2	P00734
F2R	P25116
F2RL3	Q96RI0
F5	P12259
F7	P08709
F8	P00451
F9	P00740
FAM131A	Q6UXB0
FAM171A1	Q5VUB5
FAM171B	Q6P995
FAM172A	Q8WUF8
FAM177A1	Q8N128
FAM180A	Q6UWF9
FAM189A1	O60320
FAM198A	Q9UFP1
FAM19A1	Q7Z5A9
FAM19A3	Q7Z5A8
FAM19A4	Q96LR4
FAM19A5	Q7Z5A7
FAM237B
FAM78A	Q5JUQ0
FAM96A	Q9H5X1
FAS	P25445
FAT1	Q14517
FBLN1	P23142
FBLN2	P98095
FBLN5	Q9UBX5
FBLN7	Q53RD9
FBN1	P35555
FBN2	P35556
FBN3	Q75N90
FCAR	P24071
FCGBP
FCGR1B	Q92637
FCGR3A	P08637
FCGRT	P55899
FCMR	O60667
FCN1	O00602
FCN2	Q15485
FCN3	O75636
FCRL1	Q96LA6
FCRL3	Q96P31
FCRL5	Q96RD9
FCRLA	Q7L513
FCRLB	Q6BAA4
FDCSP	Q8NFU4
FETUB	Q9UGM5
FGA	P02671
FGB	P02675
FGF10	O15520
FGF17	O60258
FGF18	O76093
FGF19	O95750
FGF21	Q9NSA1
FGF22	Q9HCT0
FGF23	Q9GZV9
FGF3	P11487
FGF4	P08620
FGF5	P12034
FGF7	P21781
FGF8	P55075
FGFBP1	Q14512
FGFBP2	Q9BYJ0
FGFBP3	Q8TAT2
FGFR1	P11362
FGFR2	P21802
FGFR3	P22607
FGFR4	P22455
FGFRL1	Q8N441
FGG	P02679
FGL1	Q08830
FGL2	Q14314
FHL1	Q13642
FHOD3	Q2V2M9
FIBIN	Q8TAL6
FJX1	Q86VR8
FKBP10	Q96AY3
FKBP11	Q9NYL4
FKBP14	Q9NWM8
FKBP2	P26885
FKBP7	Q9Y680
FKBP9	O95302
FLT1	P17948
FLT4	P35916
FMOD	Q06828
FN1	P02751
FNDC1	Q4ZHG4
FNDC7	Q5VTL7
FOLR2	P14207
FOLR3	P41439
FOXRED2	Q8IWF2
FP565260.6
FPGS	Q05932
FRAS1	Q86XX4
FREM1	Q5H8C1
FREM3	P0C091
FRMPD2	Q68DX3
FRZB	Q92765
FSHB	P01225
FSHR	P23945
FST	P19883
FSTL1	Q12841
FSTL3	O95633
FSTL4	Q6MZW2
FSTL5	Q8N475
FUCA1	P04066
FUCA2	Q9BTY2
FURIN	P09958
FUT11	Q495W5
FXR1	P51114
FXYD3	Q14802
GAA	P10253
GABBR1	Q9UBS5
GABRA1	P14867
GABRA2	P47869
GABRA5	P31644
GABRD	O14764
GABRG3	Q99928
GABRP	O00591
GAL	P22466
GALC	P54803
GALNS	P34059
GALNT15	Q8N3T1
GALNT2	Q10471
GALP	Q9UBC7
GANAB	Q14697
GAPVD1	Q14C86
GARS	P41250
GAS1	P54826
GAS6	Q14393
GAST	P01350
GC	P02774
GCG	P01275
GCGR	P47871
GCSH	P23434
GDF1	P27539
GDF10	P55107
GDF11	O95390
GDF15	Q99988
GDF2	Q9UK05
GDF3	Q9NR23
GDF5	P43026
GDF6	Q6KF10
GDF7	Q7Z4P5
GDF9	O60383
GDNF	P39905
GFPT2	O94808
GFRA2	O00451
GFRA4	Q9GZZ7
GGH	Q92820
GH1	P01241
GH2	P01242
GHDC	Q8N2G8
GHRH	P01286
GHRL	Q9UBU3
GIF	P27352
GIP	P09681
GKN2	Q86XP6
GLA	P06280
GLB1	P16278
GLB1L	Q6UWU2
GLG1	Q92896
GLIPR1	P48060
GLIPR1L1	Q6UWM5
GLMP	Q8WWB7
GLRB	P48167
GLS	O94925
GLT6D1	Q7Z4J2
GLT8D2	Q9H1C3
GLTPD2	A6NH11
GM2A	P17900
GML	Q99445
GNLY	P22749
GNPTG	Q9UJJ9
GNRH1	P01148
GNRH2	O43555
GORAB	Q5T7V8
GP2	P55259
GP6	Q9HCN6
GPC2	Q8N158
GPC5	P78333
GPC6	Q9Y625
GPER1	Q99527
GPHA2	Q96T91
GPHB5	Q86YW7
GPIHBP1	Q8IV16
GPLD1	P80108
GPNMB	Q14956
GPR162	Q16538
GPX3	P22352
GPX4	P36969
GPX5	O75715
GPX6	P59796
GPX7	Q96SL4
GREM1	O60565
GREM2	Q9H772
GRHL3	Q8TE85
GRIA2	P42262
GRIA3	P42263
GRIA4	P48058
GRM2	Q14416
GRM3	Q14832
GRM5	P41594
GRN	P28799
GRP	P07492
GSDME	O60443
GSN	P06396
GTDC1	Q4AE62
GUCA2A	Q02747
GUCA2B	Q16661
GUSB	P08236
GXYLT2	A0PJZ3
GYPB	P06028
GZMA	P12544
GZMB	P10144
GZMH	P20718
GZMK	P49863
GZMM	P51124
H6PD	O95479
HABP2	Q14520
HADHB	P55084
HAMP	P81172
HAPLN1	P10915
HAPLN2	Q9GZV7
HAPLN3	Q96S86
HAPLN4	Q86UW8
HARS2	P49590
HAVCR1	Q96D42
HBS1L	Q9Y450
HCRT	O43612
HDHD5	Q9BXW7
HEATR5A	Q86XA9
HEPH	Q9BQS7
HEXA	P06865
HFE2	Q6ZVN8
HGF	P14210
HGFAC	Q04756
HHIP	Q96QV1
HHIPL1	Q96JK4
HHIPL2	Q6UWX4
HHLA1	C9JL84
HHLA2	Q9UM44
HIBADH	P31937
HIPK1	Q86Z02
HLA-A	P04439, P13746, P16188
HLA-C	P10321
HLA-DOA	P06340
HLA-DPA1	P20036
HLA-DQA1	P01909
HLA-DQB1
HLA-DQB2	P05538
HMCN1	Q96RW7
HMCN2	Q8NDA2
HP	P00738
HPR	P00739
HPSE	Q9Y251
HPSE2	Q8WWQ2
HPX	P02790
HRC	P23327
HRG	P04196
HS3ST1	O14792
HS6ST2	Q96MM7
HS6ST3	Q8IZP7
HSD11B1L	Q7Z5J1
HSD17B11	Q8NBQ5
HSP90B1	P14625
HSPA13	P48723
HSPA5	P11021
HSPG2	P98160
HTATIP2	Q9BUP3
HTD2	P86397
HTN1	P15515
HTN3	P15516
HTRA1	Q92743
HTRA3	P83110
HTRA4	P83105
HYAL1	Q12794
HYAL2	Q12891
HYAL3	O43820
HYOU1	Q9Y4L1
IAPP	P10997
IBSP	P21815
ICAM1	P05362
ICAM2	P13598
ICAM4	Q14773
IDS	P22304
IDUA	P35475
IER3IP1	Q9Y5U9
IFFO2	Q5TF58
IFI30	P13284
IFNA1	P01562
IFNA10	P01566
IFNA13	P01562
IFNA14	P01570
IFNA16	P05015
IFNA17	P01571
IFNA2	P01563
IFNA21	P01568
IFNA4	P05014
IFNA5	P01569
IFNA6	P05013
IFNA7	P01567
IFNA8	P32881
IFNAR1	P17181
IFNB1	P01574
IFNG	P01579
IFNGR1	P15260
IFNL1	Q8IU54
IFNL3	Q8IZI9
IFNW1	P05000
IGF1	P05019
IGF2	P01344
IGFALS	P35858
IGFBP1	P08833
IGFBP2	P18065
IGFBP3	P17936
IGFBP4	P22692
IGFBP5	P24593
IGFBP6	P24592
IGFBP7	Q16270
IGFBPL1	Q8WX77
IGFL1	Q6UW32
IGFL2	Q6UWQ7
IGFL3	Q6UXB1
IGFLR1	Q9H665
IGLON5	A6NGN9
IGSF1	Q8N6C5
IGSF10	Q6WRI0
IGSF11	Q5DX21
IGSF21	Q96ID5
IGSF8	Q969P0
IGSF9	Q9P2J2
IHH	Q14623
IL10	P22301
IL11	P20809
IL11RA	Q14626
IL12B	P29460
IL12RB1	P42701
IL12RB2	Q99665
IL13	P35225
IL13RA1	P78552
IL15RA	Q13261
IL17A	Q16552
IL17B	Q9UHF5
IL17C	Q9P0M4
IL17D	Q8TAD2
IL17F	Q96PD4
IL17RA	Q96F46
IL17RC	Q8NAC3
IL17RE	Q8NFR9
IL18BP	O95998
IL18R1	Q13478
IL18RAP	O95256
IL19	Q9UHD0
IL1R1	P14778
IL1R2	P27930
IL1RAP	Q9NPH3
IL1RL1	Q01638
IL1RL2	Q9HB29
IL1RN	P18510
IL2	P60568
IL20	Q9NYY1
IL20RA	Q9UHF4
IL21	Q9HBE4
IL22	Q9GZX6
IL22RA2	Q969J5
IL23A	Q9NPF7
IL25	Q9H293
IL26	Q9NPH9
IL27	Q8NEV9
IL2RB	P14784
IL3	P08700
IL31	Q6EBC2
IL31RA	Q8NI17
IL34	Q6ZMJ4
IL3RA	P26951
IL4	P05112
IL4I1	Q96RQ9
IL4R	P24394
IL5	P05113
IL5RA	Q01344
IL6	P05231
IL6R	P08887
IL6ST	P40189
IL7	P13232
IL7R	P16871
IL9	P15248
ILDR1	Q86SU0
ILDR2	Q71H61
IMP4	Q96G21
IMPG1	Q17R60
INHA	P05111
INHBA	P08476
INHBB	P09529
INHBC	P55103
INHBE	P58166
INS	P01308
INS-IGF2	F8WCM5
INSL3	P51460
INSL4	Q14641
INSL5	Q9Y5Q6
INSL6	Q9Y581
IPO11	Q9UI26
IQCF6	A8MYZ5
IQGAP1	P46940
IRAK3	Q9Y616
ISLR	O14498
ISLR2	Q6UXK2
ISM1	B1AKI9
ISM2	Q6H9L7
ITGA4	P13612
ITGA9	Q13797
ITGAL	P20701
ITGAX	P20702
ITGB1	P05556
ITGB2	P05107
ITGB3	P05106
ITGB7	P26010
ITGBL1	O95965
ITIH1	P19827
ITIH2	P19823
ITIH3	Q06033
ITIH4	Q14624
ITIH5
ITIH6	Q6UXX5
ITLN1	Q8WWA0
ITLN2	Q8WWU7
IZUMO1R	A6ND01
IZUMO4	Q1ZYL8
JAM3	Q9BX67
JAML	Q86YT9
JCHAIN	P01591
JMJD8	Q96S16
KANSL2	Q9H9L4
KAZALD1	Q96I82
KCNIP2	Q9NS61
KCNIP3	Q9Y2W7
KCNK7	Q9Y2U2
KCNU1	A8MYU2
KCP
KDELC1	Q6UW63
KDELC2	Q7Z4H8
KDM3B	Q7LBC6
KDSR	Q06136
KERA	O60938
KIAA0319	Q5VV43
KIAA1324	Q6UXG2
KIFC2	Q96AC6
KIR2DL4	Q99706
KIRREL2	Q6UWL6
KISS1	Q15726
KLHL22	Q53GT1
KLK1	P06870
KLK10	O43240
KLK11	Q9UBX7
KLK12	Q9UKR0
KLK13	Q9UKR3
KLK14	Q9P0G3
KLK15	Q9H2R5
KLK2	P20151
KLK3	P07288
KLK4	Q9Y5K2
KLK5	Q9Y337
KLK6	Q92876
KLK7	P49862
KLK8	O60259
KLK9	Q9UKQ9
KLKB1	P03952
KMT5A	Q9NQR1
KNG1	P01042
KREMEN2	Q8NCW0
KRTDAP	P60985
L1CAM	P32004
LACRT	Q9GZZ8
LAG3	P18627
LAIR2	Q6ISS4
LALBA	P00709
LAMA1	P25391
LAMA2	P24043
LAMA3	Q16787
LAMA4	Q16363
LAMA5	O15230
LAMB1	P07942
LAMB2	P55268
LAMB3	Q13751
LAMB4	A4D0S4
LAMC1	P11047
LAMC2	Q13753
LAMC3	Q9Y6N6
LAMP3	Q9UQV4
LARGE2	Q8N3Y3
LAT2	Q9GZY6
LBP	P18428
LCAT	P04180
LCN1	P31025
LCN10	Q6JVE6
LCN12	Q6JVE5
LCN15	Q6UWW0
LCN2	P80188
LCN6	P62502
LCN9	Q8WX39
LDLR	P01130
LDLRAD2	Q5SZI1
LEAP2	Q969E1
LECT2	O14960
LEFTY1	O75610
LEFTY2	O00292
LEP	P41159
LFNG	Q8NES3
LGALS3BP	Q08380
LGI1	O95970
LGI2	Q8N0V4
LGI3	Q8N145
LGI4	Q8N135
LGMN	Q99538
LGR4	Q9BXB1
LHB	P01229
LHCGR	P22888
LIF	P15018
LILRA2	Q8N149
LILRB3	O75022
LIME1	Q9H400
LINGO1	Q96FE5
LIPA	P38571
LIPC	P11150
LIPF	P07098
LIPG	Q9Y5X9
LIPH	Q8WWY8
LIPK	Q5VXJ0
LIPN	Q5VXI9
LMAN2	Q12907
LNX1	Q8TBB1
LOX	P28300
LOXL1	Q08397
LOXL2	Q9Y4K0
LOXL3	P58215
LOXL4	Q96JB6
LPA	P08519
LPL	P06858
LPO	P22079
LRAT	O95237
LRCOL1	A6NCL2
LRFN4	Q6PJG9
LRFN5	Q96NI6
LRG1	P02750
LRP1	Q07954
LRP11	Q86VZ4
LRP1B	Q9NZR2
LRP2	P98164
LRP4	O75096
LRPAP1	P30533
LRRC17	Q8N6Y2
LRRC32	Q14392
LRRC3B	Q96PB8
LRRC4B	Q9NT99
LRRC70	Q7Z2Q7
LRRCC1	Q9C099
LRRN3	Q9H3W5
LRRTM1	Q86UE6
LRRTM4	Q86VH4
LRTM2	Q8N967
LSR	Q86X29
LST1	O00453
LTA	P01374
LTBP1	Q14766
LTBP2	Q14767
LTBP3	Q9NS15
LTBP4	Q8N2S1
LTBR	P36941
LTF	P02788
LTK	P29376
LUM	P51884
LUZP2	Q86TE4
LY6E	Q16553
LY6G5B	Q8NDX9
LY6G6D	O95868
LY6G6E
LY6H	O94772
LY6K	Q17RY6
LY6L	H3BQJ8
LY86	O95711
LY96	Q9Y6Y9
LYG1	Q8N1E2
LYG2	Q86SG7
LYNX1	P0DP58
LYNX1-SLURP2
LYPD1	Q8N2G4
LYPD2	Q6UXB3
LYPD4	Q6UWN0
LYPD6	Q86Y78
LYPD8	Q6UX82
LYZ	P61626
LYZL4	Q96KX0
LYZL6	O75951
M6PR	P20645
MAD1L1	Q9Y6D9
MAG	P20916
MAGT1	Q9H0U3
MALSU1	Q96EH3
MAMDC2	Q7Z304
MAN2B1	O00754
MAN2B2	Q9Y2E5
MANBA	O00462
MANEAL	Q5VSG8
MANF
MANSC1	Q9H8J5
MARCOL
MARK3	P27448
MASP1	P48740
MASP2	O00187
MATN1	P21941
MATN2	O00339
MATN3	O15232
MATN4	O95460
MAZ	P56270
MBL2	P11226
MCCD1	P59942
MCF2L	O15068
MCFD2	Q8NI22
MDGA1	Q8NFP4
MDK	P21741
MEGF10	Q96KG7
MEGF6	O75095
MEIS3	Q99687
MELTF	P08582
MEPE	Q9NQ76
MESD	Q14696
MEST	Q5EB52
MET	P08581
METRN	Q9UJH8
METRNL	Q641Q3
METTL17	Q9H7H0
METTL24	Q5JXM2
METTL7B	Q6UX53
METTL9	Q9H1A3
MFAP2	P55001
MFAP3	P55082
MFAP3L	O75121
MFAP4	P55083
MFAP5	Q13361
MFGE8	Q08431
MGA	Q8IWI9
MGAT4B	Q9UQ53
MGP	P08493
MGST2	Q99735
MIA	Q16674
MIA3	Q5JRA6
MIER1	Q8N108
MINPP1	Q9UNW1
MLEC	Q14165
MLN	P12872
MLXIP	Q9HAP2
MMP1	P03956
MMP10	P09238
MMP11	P24347
MMP12	P39900
MMP13	P45452
MMP17	Q9ULZ9
MMP19	Q99542
MMP2	P08253
MMP20	O60882
MMP21	Q8N119
MMP25	Q9NPA2
MMP26	Q9NRE1
MMP27	Q9H306
MMP28	Q9H239
MMP3	P08254
MMP7	P09237
MMP8	P22894
MMP9	P14780
MMRN1	Q13201
MMRN2	Q9H8L6
MOXD1	Q6UVY6
MPIG6B	O95866
MPO	P05164
MPZL1	O95297
MR1	Q95460
MRPL32	Q9BYC8
MRPL52	Q86TS9
MRPS22	P82650
MRPS28	Q9Y2Q9
MS4A13	Q5J8X5
MSH5	O43196
MSLN	Q13421
MSMB	P08118
MSRA	Q9UJ68
MSRB2	Q9Y3D2
MSRB3	Q8IXL7
MST1
MSTN	O14793
MTMR14	Q8NCE2
MTTP	P55157
MUC1	P15941
MUC13	Q9H3R2
MUC20	Q8N307
MUC3A	Q02505
MUC5AC	P98088
MUC5B	Q9HC84
MUC6	Q6W4X9
MUC7	Q8TAX7
MUCL1	Q96DR8
MXRA5	Q9NR99
MXRA7	P84157
MYBBP1A	Q9BQG0
MYDGF	Q969H8
MYH15	Q9Y2K3
MYMX	A0A1B0GTQ4
MYOC	Q99972
MYRFL	Q96LU7
MZB1	Q8WU39
N4BP2L2	Q92802
NAA38	Q9BRA0
NAAA	Q02083
NAGA	P17050
NAGLU	P54802
NAPSA	O96009
NAXE	Q8NCW5
NBL1	P41271
NBPF26
NCAM1	P13591
NCAN	O14594
NCSTN	Q92542
NDNF	Q8TB73
NDP	Q00604
NDUFA10	O95299
NDUFB5	O43674
NDUFS3	O75489
NDUFS8	O00217
NECTIN1	Q15223
NELL1	Q92832
NELL2	Q99435
NENF	Q9UMX5
NETO1	Q8TDF5
NFASC	O94856
NGF	P01138
NGRN	Q9NPE2
NID1	P14543
NID2	Q14112
NKAIN4	Q8IVV8
NLGN3	Q9NZ94
NLGN4Y	Q8NFZ3
NMB	P08949
NME3	Q13232
NMS	Q5H8A3
NMU	P48645
NOA1	Q8NC60
NODAL	Q96S42
NOG	Q13253
NOMO3	P69849
NOTCH3	Q9UM47
NOTUM	Q6P988
NOV	P48745
NPB	Q8NG41
NPC2	P61916
NPFF	O15130
NPHS1	O60500
NPNT	Q6UXI9
NPPA	P01160
NPPB	P16860
NPPC	P23582
NPS	P0C0P6
NPTX1	Q15818
NPTX2	P47972
NPVF	Q9HCQ7
NPW	Q8N729
NPY	P01303
NRCAM	Q92823
NRG1	Q02297
NRN1L	Q496H8
NRP1	O14786
NRP2	O60462
NRXN1	P58400, Q9ULB1
NRXN2	P58401, Q9P2S2
NT5E	P21589
NTF3	P20783
NTF4	P34130
NTM	Q9P121
NTN1	O95631
NTN3	O00634
NTN4	Q9HB63
NTN5	Q8WTR8
NTNG1	Q9Y2I2
NTNG2	Q96CW9
NTS	P30990
NUBPL	Q8TB37
NUCB1	Q02818
NUCB2
NUDT9	Q9BW91
NUP214	P35658
NXPH1	P58417
NXPH2	O95156
NXPH3	O95157
NXPH4	O95158
NYX	Q9GZU5
OAF	Q86UD1
OBP2A	Q9NY56
OBP2B	Q9NPH6
OC90	Q02509
OCLN	Q16625
ODAM	A1E959
ODAPH	Q17RF5
OGG1	O15527
OGN	P20774
OIT3	Q8WWZ8
OLFM1	Q99784
OLFM2	O95897
OLFM3	Q96PB7
OLFM4	Q6UX06
OLFML1	Q6UWY5
OLFML2A	Q68BL7
OLFML2B	Q68BL8
OLFML3	Q9NRN5
OMD	Q99983
OMG	P23515
OOSP2	Q86WS3
OPCML	Q14982
OPRPN	Q99935
OPTC	Q9UBM4
ORM1	P02763
ORM2	P19652
OS9	Q13438
OSCAR	Q8IYS5
OSM	P13725
OSMR	Q99650
OSR2	Q8N2R0
OSTN	P61366
OTOA	Q7RTW8
OTOG	Q6ZRI0
OTOGL	Q3ZCN5
OTOL1	A6NHN0
OTOR	Q9NRC9
OTOS	Q8NHW6
OVCH1	Q7RTY7
OVCH2
OVGP1	Q12889
OXCT1	P55809
OXT	P01178
P3H1	Q32P28
P3H2	Q8IVL5
P3H3	Q8IVL6
P3H4	Q92791
P4HA1	P13674
P4HA2	O15460
P4HA3	Q7Z4N8
P4HB	P07237
PAEP	P09466
PALB2	Q86YC2
PAM	P19021
PAMR1	Q6UXH9
PAPLN	O95428
PAPPA	Q13219
PAPPA2	Q9BXP8
PARP15	Q460N3
PATE1	Q8WXA2
PATE2	Q6UY27
PATE3	B3GLJ2
PATE4	P0C8F1
PAX2	Q02962
PCCB	P05166
PCDH1	Q08174
PCDH15	Q96QU1
PCDHA1	Q9Y5I3
PCDHA10	Q9Y5I2
PCDHA11	Q9Y5I1
PCDHA6	Q9UN73
PCDHB12	Q9Y5F1
PCDHGA11	Q9Y5H2
PCOLCE	Q15113
PCOLCE2	Q9UKZ9
PCSK1	P29120
PCSK1N	Q9UHG2
PCSK2	P16519
PCSK4	Q6UW60
PCSK5	Q92824
PCSK9	Q8NBP7
PCYOX1	Q9UHG3
PCYOX1L	Q8NBM8
PDE2A	O00408
PDE7A	Q13946
PDF	Q9HBH1
PDGFA	P04085
PDGFB	P01127
PDGFC	Q9NRA1
PDGFD	Q9GZP0
PDGFRA	P16234
PDGFRB	P09619
PDGFRL	Q15198
PDIA2	Q13087
PDIA3	P30101
PDIA4	P13667
PDIA5	Q14554
PDIA6	Q15084
PDILT	Q8N807
PDYN	P01213
PDZRN4	Q6ZMN7
PEAR1	Q5VY43
PEBP4	Q96S96
PECAM1
PENK	P01210
PET117	Q6UWS5
PF4	P02776
PF4V1	P10720
PFKP	Q01813
PGA3	P0DJD8
PGA4	P0DJD7
PGA5	P0DJD9
PGAP3	Q96FM1
PGC	P20142
PGF	P49763
PGLYRP1	O75594
PGLYRP2	Q96PD5
PGLYRP3	Q96LB9
PGLYRP4	Q96LB8
PHACTR1	Q9C0D0
PI15	O43692
PI3	P19957
PIANP	Q8IYJ0
PIEZO2	Q9H5I5
PIGK	Q92643
PIGL	Q9Y2B2
PIGT	Q969N2
PIGZ	Q86VD9
PIK3IP1	Q96FE7
PILRA	Q9UKJ1
PILRB	Q9UKJ0
PINLYP	A6NC86
PIP	P12273
PIWIL4	Q7Z3Z4
PKDCC	Q504Y2
PKHD1	P08F94
PLA1A	Q53H76
PLA2G10	O15496
PLA2G12A	Q9BZM1
PLA2G12B	Q9BX93
PLA2G15	Q8NCC3
PLA2G1B	P04054
PLA2G2A	P14555
PLA2G2C	Q5R387
PLA2G2D	Q9UNK4
PLA2G2E	Q9NZK7
PLA2G4F	Q68DD2
PLA2G5	P39877
PLA2G7	Q13093
PLA2R1	Q13018
PLAC1	Q9HBJ0
PLAC9	Q5JTB6
PLAT	P00750
PLAU	P00749
PLAUR	Q03405
PLBD1	Q6P4A8
PLEKHH3	Q7Z736
PLG	P00747
PLGLB1	Q02325
PLGLB2	Q02325
PLOD1	Q02809
PLOD2	O00469
PLOD3	O60568
PLTP	P55058
PLXNA4	Q9HCM2
PLXNB2	O15031
PM20D1	Q6GTS8
PMCH	P20382
PMEL	P40967
PMEPA1	Q969W9
PNLIP	P16233
PNLIPRP1	P54315
PNLIPRP3	Q17RR3
PNOC	Q13519
PNPLA4	P41247
PODNL1	Q6PEZ8
POFUT1	Q9H488
POFUT2	Q9Y2G5
POGLUT1	Q8NBL1
POLL	Q9UGP5
POMC	P01189
POMGNT2	Q8NAT1
PON1	P27169
POSTN	Q15063
PPBP	P02775
PPIC	P45877
PPP1CC	P36873
PPT1	P50897
PPT2	Q9UMR5
PPY	P01298
PRADC1	Q9BSG0
PRAP1	Q96NZ9
PRB1
PRB2	P02812
PRB3	Q04118
PRB4
PRCD	Q00LT1
PRCP	P42785
PRDX4	Q13162
PRELP	P51888
PRF1	P14222
PRG2	P13727
PRG3	Q9Y2Y8
PRG4	Q92954
PRH1
PRH2	P02810
PRKCSH	P14314
PRL	P01236
PRLH	P81277
PRLR	P16471
PRNP	P04156
PROC	P04070
PROK1	P58294
PROK2	Q9HC23
PROM1	O43490
PROS1	P07225
PROZ	P22891
PRR27	Q6MZM9
PRR4	Q16378
PRRG2	O14669
PRRT3	Q5FWE3
PRRT4	C9JH25
PRSS1	P07477
PRSS12	P56730
PRSS2	P07478
PRSS21	Q9Y6M0
PRSS22	Q9GZN4
PRSS23	O95084
PRSS27	Q9BQR3
PRSS3	P35030
PRSS33	Q8NF86
PRSS35	Q8N3Z0
PRSS36	Q5K4E3
PRSS37	A4D1T9
PRSS38	A1L453
PRSS41	Q7RTY9
PRSS42	Q7Z5A4
PRSS48	Q7RTY5
PRSS50	Q9UI38
PRSS50	Q9UI38
PRSS51	A0A1B0GVH4
PRSS53	Q2L4Q9
PRSS54	Q6PEW0
PRSS55	Q6UWB4
PRSS56	P0CW18
PRSS57	Q6UWY2
PRSS58	Q8IYP2
PRSS8	Q16651
PRTG	Q2VWP7
PRTN3	P24158
PSAP	P07602
PSAPL1	Q6NUJ1
PSG1	P11464
PSG11	Q9UQ72
PSG2	P11465
PSG3	Q16557
PSG4	Q00888
PSG5	Q15238
PSG6	Q00889
PSG7
PSG8	Q9UQ74
PSG9	Q00887
PSORS1C2	Q9UIG4
PSPN	O60542
PTGDS	P41222
PTGIR	P43119
PTGS1	P23219
PTGS2	P35354
PTH	P01270
PTH2	Q96A98
PTHLH	P12272
PTK7	Q13308
PTN	P21246
PTPN5	P54829
PTPRA	P18433
PTPRB	P23467
PTPRC
PTPRCAP	Q14761
PTPRD	P23468
PTPRF	P10586
PTPRJ	Q12913
PTPRO	Q16827
PTPRS	Q13332
PTTG1IP	P53801
PTX3	P26022
PTX4	Q96A99
PVR	P15151
PXDN	Q92626
PXDNL	A1KZ92
PXYLP1	Q8TE99
PYY	P10082
PZP	P20742
QPCT	Q16769
QPRT	Q15274
QRFP	P83859
QSOX1	O00391
R3HDML	Q9H3Y0
RAET1G	Q6H3X3
RAMP2	O60895
RAPGEF5	Q92565
RARRES1	P49788
RARRES2	Q99969
RBM3	P98179
RBP3	P10745
RBP4	P02753
[truncated: 526 more rows]

## Sheet: SPOCTOPUS
Gene (Spoctopus)	Uniprot		Gene name in threshold	IDs in threshold		Genes found in Spoctopus and in threshold
A1BG	P04217		ATP5F1A	K7EJP1		FN1
A2M	P01023			K7EK77		MYL6B
A2ML1	A8K2U0			K7ENJ4		PRDX4
A4GNT	Q9UNA3			K7EQH4		PSMB6
AADAC	P22760			K7ERX7		TXNDC12
AADACL2	Q6P093			P25705
AAMP	Q13685			P25705-2
AANAT	Q16613		CNN2	A0A087X271
AATK	Q6ZMQ8			B4DDF4
ABCG1	P45844			B4DUT8
ABHD10	Q9NUJ1			H3BVI6
ABHD14A	Q9BUJ0			K7ES69
ABHD14A-ACY1				Q99439
ABHD15	Q6UXT9			Q99439-2
ABHD8	Q96I13		EWSR1	A0A0D9SFL3
ABI3BP	Q7Z7G0			B0QYK0
ABL2	P42684			C9JGE3
ABRAXAS1	Q6UWZ7			H7BY36
ABRAXAS2	Q15018			Q01844
AC001226.2				Q01844-2
AC004233.2				Q01844-3
AC006518.7				Q01844-5
AC007846.2				Q01844-6
AC008687.1			FN1	H0Y4K8
AC022167.5				H0Y7Z1
AC025165.3				P02751
AC068790.8				P02751-10
AC073896.1				P02751-11
AC079341.3				P02751-12
AC090527.2				P02751-13
AC091980.2				P02751-14
AC092442.1				P02751-15
AC092718.8				P02751-17
AC093525.1				P02751-3
AC114490.3				P02751-4
AC126283.2				P02751-5
AC134669.1				P02751-6
AC135050.2				P02751-7
AC136352.3				P02751-8
AC136428.1				P02751-9
AC145212.1	Q8WZ33		H2AC11; H2AC13; H2AC15; H2AC16; H2AC17	P0C0S8
AC233755.1	P0DP08		H2AC20	Q16777
AC243967.1			H2AC4; H2AC8	P04908
ACACB	O00763		H2AC6	Q93077
ACAN			H2AC7	P20671
ACE	P12821		H2AJ	H0YFX9
ACHE	P22303			Q9BTM1
ACP1	P24666			Q9BTM1-2
ACP2	P11117		H2AW	Q7L7L0
ACP5	P13686		H2AX	P16104
ACP6	Q9NPH0		H2AZ2	C9J0D1
ACP7	Q6ZNF0			C9J386
ACPP	P15309			Q71UI9
ACR	P10323			Q71UI9-2
ACRBP	Q8NEB7			Q71UI9-3
ACRV1	P26436			Q71UI9-4
ACSF2	Q96CM8			Q71UI9-5
ACSF3	Q4G176		KRT8	F8VP67
ACTN1	P12814			F8VUG2
ACVR1	Q04771			F8W1U3
ACVR1C	Q8NER5			P05787
ACVRL1	P37023			P05787-2
ACYP1	P07311		LSM3	P62310
ACYP2	P14621		MYL6B	F8W1I5
ADA2	Q9NZK5			P14649
ADAM10	O14672		NUCKS1	Q9H1E3
ADAM12	O43184			Q9H1E3-2
ADAM15	Q13444		PEA15	B1AKZ5
ADAM17	P78536			Q15121
ADAM18	Q9Y3Q7			Q15121-2
ADAM22	Q9P0K1		PRDX4	H7C3T4
ADAM28	Q9UKQ2			Q13162
ADAM29	Q9UKF5		PSMB6	P28072
ADAM32	Q8TC27		RPS15	A0A0B4J2B4
ADAM33	Q9BZ11			K7EJ78
ADAM7	Q9H2U9			K7ELC2
ADAM8	P78325			K7EM56
ADAM9	Q13443			K7EQJ5
ADAMDEC1	O15204			P62841
ADAMTS1	Q9UHI8			S4R417
ADAMTS10	Q9H324			S4R456
ADAMTS12	P58397		SEPTIN11	D6RDU5
ADAMTS13	Q76LX8			D6RER5
ADAMTS14	Q8WXS8			D6RGI3
ADAMTS15	Q8TE58			Q9NVA2
ADAMTS16	Q8TE57			Q9NVA2-2
ADAMTS17	Q8TE56		SEPTIN6	B1AMS2
ADAMTS18	Q8TE60			Q14141
ADAMTS19	Q8TE59			Q14141-2
ADAMTS2	O95450			Q14141-3
ADAMTS20	P59510			Q14141-4
ADAMTS3	O15072		SEPTIN7	A0A0U1RRE1
ADAMTS4	O75173			A0A0U1RRH9
ADAMTS5	Q9UNA0			E7EPK1
ADAMTS6	Q9UKP5			E7ES33
ADAMTS7	Q9UKP4			G3V1Q4
ADAMTS8	Q9UP79			Q16181
ADAMTS9	Q9P2N4			Q16181-2
ADAMTSL1	Q8N6G6		SEPTIN8	A0A087X142
ADAMTSL2	Q86TH1			A6NFQ9
ADAMTSL3	P82987			A6NMH6
ADAMTSL4	Q6UY14			C9JV02
ADAMTSL5				F8W8I8
ADARB2	Q9NS39			Q92599
ADAT1	Q9BUB4			Q92599-2
ADCK1	Q86TW2			Q92599-3
ADCY4	Q8NFM4			Q92599-4
ADCY7	P51828		SFN	P31947
ADCYAP1	P18509			P31947-2
ADCYAP1R1	P41586		SPTAN1	A0A0D9SF54
ADGRA3	Q8IWK6			A0A0D9SGF6
ADGRB2	O60241			Q13813
ADGRD1	Q6QNK2			Q13813-2
ADGRE3	Q9BY15			Q13813-3
ADGRE5	P48960		SRSF2	J3KP15
ADGRF1	Q5T601			J3QL05
ADGRG1	Q9Y653			Q01130
ADGRG5	Q8IZF4			Q01130-2
ADGRG6	Q86SQ4		TXN	P10599
ADGRV1	Q8WXG9			P10599-2
ADI1	Q9BV57		TXNDC12	O95881
ADIG	Q0VDE8		YWHAB	A0A0J9YWE8
ADIPOQ	Q15848			A0A0J9YWZ2
ADM	P35318			P31946
ADM2	Q7Z4H4			P31946-2
ADM5	C9JUS6			Q4VY19
ADPGK	Q9BRR6			Q4VY20
ADPRHL2	Q9NX46		YWHAG	P61981
ADSSL1	Q8N142		YWHAH	A2IDB2
AEBP1	Q8IUX7			Q04917
AFF3	P51826
AFG1L	Q8WV93
AFM	P43652
AFP	P02771
AGA	P20933
AGBL1	Q96MI9
AGER	Q15109
AGK	Q53H12
AGPS	O00116
AGR2	O95994
AGR3	Q8TD06
AGRN	O00468
AGRP	O00253
AGT	P01019
AGTPBP1	Q9UPW5
AGTRAP	Q6RW13
AHSG	P02765
AK4	P27144
AKAP10	O43572
AKAP2	Q9Y2D5
AKAP6	Q13023
AKIRIN2	Q53H80
AKR1C1	Q04828
AL021546.1
AL049629.2
AL049634.2
AL160272.2
AL162417.1
AL163195.3
AL163636.2
AL354761.1
AL358113.1
AL365214.3
AL645922.1
AL645941.2
AL662899.1
AL929554.1
ALAS2	P22557
ALB	P02768
ALDH9A1	P49189
ALDOA	P04075
ALG1	Q9BT22
ALG13	Q9NP73
ALG9	Q9H6U8
ALKAL1	Q6UXT8
ALKAL2	Q6UX46
ALKBH1	Q13686
ALKBH5	Q6P6C2
ALOXE3	Q9BYJ1
ALPI	P09923
ALPK3	Q96L96
ALPL	P05186
ALPP	P05187
ALPPL2	P10696
AMBN	Q9NP70
AMBP	P02760
AMELX	Q99217
AMELY	Q99218
AMH	P03971
AMPD1	P23109
AMTN	Q6UX39
AMY1A	P04745
AMY1B	P04745
AMY1C	P04745
AMY2A	P04746
AMY2B	P19961
ANAPC11	Q9NYG5
ANAPC2	Q9UJX6
ANG	P03950
ANGEL1	Q9UNK9
ANGPT1	Q15389
ANGPT2	O15123
ANGPT4	Q9Y264
ANGPTL1	O95841
ANGPTL2	Q9UKU9
ANGPTL3	Q9Y5C1
ANGPTL4	Q9BY76
ANGPTL5	Q86XS5
ANGPTL6	Q8NI99
ANGPTL7	O43827
ANGPTL8	Q6UXH0
ANK1	P16157
ANKLE1	Q8NAG6
ANKRD54	Q6NXT1
ANKRD60	Q9BZ19
ANKS6	Q68DC2
ANO7	Q6IWH7
ANOS1	P23352
ANTXR1	Q9H6X2
AOAH	P28039
AOC1	P19801
AOC2	O75106
AOC3	Q16853
AP000721.1
AP000790.3
AP000790.4
AP002347.1
AP4E1	Q9UPM8
APBB1	O00213
APBB2	Q92870
APCDD1	Q8J025
APCS	P02743
APELA	P0DMC3
APLN	Q9ULZ1
APLP2	Q06481
APMAP	Q9HDC9
APOA1	P02647
APOA2	P02652
APOA4	P06727
APOA5	Q6Q788
APOB	P04114
APOC1	P02654
APOC2	P02655
APOC3	P02656
APOC4	P55056
APOD	P05090
APOE	P02649
APOF	Q13790
APOH	P02749
APOL1	O14791
APOL3	O95236
APOL4	Q9BPW4
APOM	O95445
APOO	Q9BUR5
APOOL	Q6UXV4
ARAP1	Q96P48
ARCN1	P48444
AREL1	O15033
ARFIP2	P53365
ARHGAP36	Q6ZRI8
ARHGAP6	O43182
ARHGEF1	Q92888
ARID2	Q68CP9
ARL16	Q0P5N6
ARMC5	Q96C12
ARMCX4
ARNTL	O00327
ARSA	P15289
ARSB	P15848
ARSE	P51690
ARSG	Q96EG1
ARSI	Q5FYB1
ARSJ	Q5FYB0
ARSK	Q6UWY0
ART3	Q13508
ART4	Q93070
ART5	Q96L15
ARTN	Q5T4W7
ASAH1	Q13510
ASAH2	Q9NR71
ASB11	Q8WXH4
ASCL1	P50553
ASGR1	P07306
ASGR2	P07307
ASIP	P42127
ASNA1	O43681
ASPN	Q9BXN1
ASPSCR1	Q9BZE9
ASTE1	Q2TB18
ASTL	Q6HA08
ATAD5	Q96QE3
ATAT1	Q5SQI0
ATF5	Q9Y2D1
ATG2A	Q2TAZ0
ATMIN	O43313
ATP13A1	Q9HD20
ATP5F1C	P36542
ATP5MC2	Q06055
ATP5PB	P24539
ATP6AP1	Q15904
ATP6AP2	O75787
ATPAF1	Q5TC12
ATXN2L	Q8WWM7
ATXN7	O15265
ATXN7	O15265
AUH	Q13825
AVP	P01185
AXIN2	Q9Y2T1
AZGP1	P25311
AZU1	P20160
B2M	P61769
B3GALNT1	O75752
B3GALNT2	Q8NCR0
B3GALT1	Q9Y5Z6
B3GALT4	O96024
B3GALT5	Q9Y2C3
B3GALT6	Q96L58
B3GAT3	O94766
B3GLCT	Q6Y288
B3GNT10	A8MXE2
B3GNT3	Q9Y2A9
B3GNT4	Q9C0J1
B3GNT5	Q9BYG0
B3GNT6	Q6ZMB0
B3GNT7	Q8NFL0
B3GNT8	Q7Z7M8
B3GNT9	Q6UX72
B4GALNT1	Q00973
B4GALNT3	Q6L9W6
B4GALNT4	Q76KP1
B4GALT4	O60513
B4GALT5	O43286
B4GALT6	Q9UBX8
B4GALT7	Q9UBV7
B4GAT1	O43505
B9D1	Q9UPM9
BACE2	Q9Y5Z0
BAIAP2	Q9UQB8
BAZ2B	Q9UIF8
BBC3	Q96PG8, Q9BXH1
BBS4	Q96RK4
BCAM	P50895
BCAN	Q96GW7
BCAP29	Q9UHQ4
BCAR1	P56945
BCHE	P06276
BCKDK	O14874
BDNF	P23560
BGLAP	P02818
BGN	P21810
BIRC2	Q13490
BIRC6	Q9NR09
BLCAP	P62952
BLOC1S3	Q6QNY0
BLVRB	P30043
BMP1	P13497
BMP10	O95393
BMP2	P12643
BMP3	P12645
BMP4	P12644
BMP6	P22004
BMP7	P18075
BMP8A	Q7Z5Y6
BMP8B	P34820
BMPER	Q8N8U9
BNC1	Q01954
BNIP2	Q12982
BOC	Q9BWV1
BOD1	Q96IK1
BPHL	Q86WA6
BPI	P17213
BPIFA1	Q9NP55
BPIFA2	Q96DR5
BPIFA3	Q9BQP9
BPIFB1	Q8TDL5
BPIFB2	Q8N4F0
BPIFB3	P59826
BPIFB4	P59827
BPIFB6	Q8NFQ5
BPIFC	Q8NFQ6
BRD3	Q15059
BRF1	Q92994
BRICD5	Q6PL45
BRINP1	O60477
BRINP2	Q9C0B6
BRINP3	Q76B58
BRIP1	Q9BX63
BSCL2	Q96G97
BSG	P35613
BSPH1	Q075Z2
BST1	Q10588
BTBD17	A6NE02
BTD	P43251
BTN2A2	Q8WVV5
BTN3A1	O00481
BTN3A2	P78410
BTN3A3	O00478
BTNL2	Q9UIR0
BX088645.1
BX248415.1
BZW2	Q9Y6E2
C10orf105	Q8TEF2
C10orf95
C10orf99	Q6UWK7
C11orf24	Q96F05
C11orf45	Q8TAV5
C11orf80	Q8N6T0
C11orf94	C9JXX5
C12orf10	Q9HB07
C12orf40	Q86WS4
C12orf49	Q9H741
C12orf65	Q9H3J6
C12orf66	Q96MD2
C12orf73	Q69YU5
C12orf76	Q8N812
C13orf46
C14orf178	Q8N769
C14orf93	Q9H972
C15orf48	Q9C002
C16orf58	Q96GQ5
C16orf74	Q96GX8
C16orf89	Q6UX73
C16orf90	A8MZG2
C16orf95	Q9H693
C17orf107	Q6ZR85
C17orf58	Q2M2W7
C17orf62	Q9BQA9
C17orf67	Q0P5P2
C17orf75	Q9HAS0
C17orf99	Q6UX52
C18orf54	Q8IYD9
C19orf12	Q9NSK7
C19orf47	Q8N9M1
C19orf53	Q9UNZ5
C19orf66	Q9NUL5
C19orf70	Q5XKP0
C1GALT1	Q9NS00
C1orf127
C1orf159	Q96HA4
C1orf198	Q9H425
C1orf226	A1L170
C1orf54	Q8WWF1
C1orf56	Q9BUN1
C1orf61	Q13536
C1orf74	Q96LT6
C1QA	P02745
C1QB	P02746
C1QBP	Q07021
C1QC	P02747
C1QL1	O75973
C1QL2	Q7Z5L3
C1QL3	Q5VWW1
C1QL4	Q86Z23
C1QTNF1	Q9BXJ1
C1QTNF12	Q5T7M4
C1QTNF2	Q9BXJ5
C1QTNF3	Q9BXJ4
C1QTNF5	Q9BXJ0
C1QTNF6	Q9BXI9
C1QTNF7	Q9BXJ2
C1QTNF8	P60827
C1QTNF9	P0C862
C1QTNF9B	B2RNN3
C1R	P00736
C1RL	Q9NZP8
C1S	P09871
C2	P06681
C20orf203	Q8NBC4
C20orf204
C20orf27	Q9GZN8
C21orf33	P30042
C21orf58	P58505
C21orf62	Q9NYP8
C22orf15	Q8WYQ4
C22orf46	C9J442
C2CD2	Q9Y426
C2orf40	Q9H1Z8
C2orf66	Q6UXQ4
C2orf69	Q8N8R5
C2orf92
C3	P01024
C3orf36	Q3SXR2
C3orf58	Q8NDZ4
C3orf85
C4A	P0C0L4
C4B	P0C0L5
C4BPA	P04003
C4BPB	P20851
C4orf48	Q5BLP8
C5	P01031
C5AR1	P21730
C5orf38	Q86SI9
C5orf46	Q6UWT4
C6	P13671
C6orf120	Q7Z4R8
C6orf15	Q6UXA7
C6orf58	Q6P5S2
C7	P10643
C7orf25	Q9BPX7
C7orf26	Q96N11
C7orf43	Q8WVR3
C7orf57	Q8NEG2
C7orf61	Q8IZ16
C8A	P07357
C8B	P07358
C8G	P07360
C9	P02748
C9orf47	Q6ZRZ4
CA10	Q9NS85
CA11	O75493
CA6	P23280
CA9	Q16790
CABLES1	Q8TDN4
CABP1	Q9NZU7
CACNA2D1	P54289
CACNA2D2	Q9NY47
CACNA2D4	Q7Z3S7
CADM3	Q8N126
CALCA	P01258, P06881
CALCB	P10092
CALCR
CALCRL	Q16602
CALHM6	Q5R3K3
CALM2	P0DP24
CALR	P27797
CALR3	Q96L12
CALU	O43852
CAMK2D	Q13557
CAMP
CANT1	Q8WVQ1
CANX	P27824
CAPN1	P07384
CAPNS1	P04632
CAPZA2	P47755
CARM1	Q86X55
CARNS1	A5YM72
CARS2	Q9HA77
CARTPT	Q16568
CASC4	Q6P4E1
CASQ1	P31415
CASQ2	O14958
CATSPERG	Q6ZRH7
CBARP	Q8N350
CBLN1	P23435
CBLN2	Q8IUK8
CBLN3	Q6UW01
CBLN4	Q9NTU7
CBWD1	Q9BRT8
CCAR2	Q8N163
CCBE1	Q6UXH8
CCDC112	Q8NEF3
CCDC117	Q8IWD4
CCDC129	Q6ZRS4
CCDC134	Q9H6E4
CCDC141
CCDC151	A5D8V7
CCDC189	A1A4V9
CCDC194	A0A1B0GVG4
CCDC3	Q9BQI4
CCDC47	Q96A33
CCDC80	Q76M96
CCDC85A	Q96PX6
CCDC88B	A6NC98
CCER2	I3L3R5
CCK	P06307
CCL1	P22362
CCL11	P51671
CCL13	Q99616
CCL14	Q16627
CCL15	Q16663
CCL16	O15467
CCL17	Q92583
CCL18	P55774
CCL19	Q99731
CCL2	P13500
CCL20	P78556
CCL21	O00585
CCL22	O00626
CCL23	P55773
CCL24	O00175
CCL25	O15444
CCL26	Q9Y258
CCL27	Q9Y4X3
CCL28	Q9NRJ3
CCL3	P10147
CCL3L1	P16619
CCL4	P13236
CCL4L2	Q8NHW4
CCL5	P13501
CCL7	P80098
CCL8	P80075
CCNA2	P20248
CCNB1IP1	Q9NPC3
CCND2	P30279
CCND3	P30281
CCNE2	O96020
CCNJL	Q8IV13
CCNL1	Q9UK58
CCNL2	Q96S94
CCSER1	Q9C0I3
CD14	P08571
CD160	O95971
CD164	Q04900
CD177
CD1E	P15812
CD2	P06729
CD200	P41217
CD200R1	Q8TD46
CD22	P20273
CD226	Q15762
CD24
CD276	Q5ZPR3
CD300LB	A8K4G0
CD300LF	Q8TDQ1
CD300LG	Q6UXG3
CD38	P28907
CD3D	P04234
CD4	P01730
CD40	P25942
CD44	P16070
CD48	P09326
CD5	P06127
CD55	P08174
CD59	P13987
CD5L	O43866
CD6	P30203
CD68	P34810
CD7	P09564
CD70	P32970
CD79A	P11912
CD80	P33681
CD86	P42081
CD8A	P01732
CD8B	P10966
CD99	P14209
CDADC1	Q9BWV3
CDC23	Q9UJX2
CDC25A	P30304
CDC40	O60508
CDCA7L	Q96GN5
CDCP1	Q9H5V8
CDCP2	Q5VXM1
CDH1	P12830
CDH11	P55287
CDH13	P55290
CDH17	Q12864
CDH19	Q9H159
CDH23	Q9H251
CDH5	P33151
CDH8	P55286
CDH9	Q9ULB4
CDHR1	Q96JP9
CDHR4	A6H8M9
CDHR5	Q9HBB8
CDK13	Q14004
CDKN2A	P42771, Q8N726
CDNF	Q49AH0
CDON	Q4KMG0
CDSN
CEACAM16	Q2WEN9
CEACAM18	A8MTB9
CEACAM19	Q7Z692
CEACAM5	P06731
CEACAM6	P40199
CEACAM7	Q14002
CEACAM8	P31997
CEL
CELA2A	P08217
CELA2B	P08218
CELA3A	P09093
CELA3B	P08861
CELF4	Q9BZC1
CEMIP	Q8WUJ3
CENPM	Q9NSP4
CEP192	Q8TEP8
CEP41	Q9BYV8
CEP57	Q86XR8
CEP89	Q96ST8
CER1	O95813
CERCAM	Q5T4B2
CERS1	P27544
CES1	P23141
CES3	Q6UWW8
CES4A	Q5XG92
CES5A	Q6NT32
CETP	P11597
CFAP157	Q5JU67
CFAP65	Q6ZU64
CFB	P00751
CFC1	P0CG37
CFC1B	P0CG36
CFD	P00746
CFDP1	Q9UEE9
CFH	P08603
CFHR1	Q03591
CFHR2	P36980
CFHR3	Q02985
CFHR4	Q92496
CFHR5	Q9BXR6
CFI	P05156
CFP	P27918
CGA	P01215
CGB1	A6NKQ9
CGB2
CGB3	P0DN86
CGB5	P0DN86
CGB7	P0DN87
CGB8	P0DN86
CGREF1	Q99674
CHAD	O15335
CHADL	Q6NUI6
CHCHD10	Q8WYQ3
CHD8	Q9HCK8
CHEK2	O96017
CHGA	P10645
CHGB	P05060
CHI3L1	P36222
CHI3L2	Q15782
CHIA	Q9BZP6
CHID1	Q9BWS9
CHIT1	Q13231
CHKA	P35790
CHL1	O00533
CHPF	Q8IZ52
CHPF2	Q9P2E5
CHRD	Q9H2X0
CHRDL1	Q9BU40
CHRDL2	Q6WN34
CHRNA2	Q15822
CHRNA5	P30532
CHRNB1	P11230
CHRND	Q07001
CHST1	O43916
CHST11	Q9NPF2
CHST13	Q8NET6
CHST4	Q8NCG5
CHST5	Q9GZS9
CHST6	Q9GZX3
CHST7	Q9NS84
CHST8	Q9H2A9
CHST9	Q7L1S5
CHSY3	Q70JA7
CHTF8	P0CG12, P0CG13
CILP	O75339
CILP2	Q8IUL8
CKLF	Q9UBR5
CKMT1A	P12532
CKMT1B	P12532
CKMT2	P17540
CLCA1	A8K7I4
CLCF1	Q9UBD9
CLDN10	P78369
CLDN15	P56746
CLDND1	Q9NY35
CLDND2	Q8NHS1
CLEC10A	Q8IUN9
CLEC11A	Q9Y240
CLEC16A	Q2KHT3
CLEC18A	A5D8T8
CLEC18B	Q6UXF7
CLEC18C	Q8NCF0
CLEC19A	Q6UXS0
CLEC20A
CLEC2B	Q92478
CLEC2D	Q9UHP7
CLEC3A
CLEC3B	P05452
CLEC4C	Q8WTT0
CLEC4D	Q8WXI8
CLEC4E	Q9ULY5
CLEC4M	Q9H2X3
CLGN	O14967
CLN5	O75503
CLPS	P04118
CLPSL1	A2RUU4
CLPSL2	Q6UWE3
CLPX	O76031
CLRN1	P58418
CLSTN3	Q9BQT9
CLU	P10909
CLUL1	Q15846
CMA1	P23946
CMPK1	P30085
CNBD1	Q8NA66
CNDP1	Q96KN2
CNOT1	A5YKK6
CNOT9	Q92600
CNPY2	Q9Y2B0
CNPY3	Q9BT09
CNPY4	Q8N129
CNTFR	P26992
CNTN1	Q12860
CNTN2	Q02246
CNTN3	Q9P232
CNTN4	Q8IWV2
CNTN5	O94779
CNTNAP2	Q9UHC6
CNTNAP3	Q9BZ76
CNTNAP3B	Q96NU0
COASY	Q13057
COCH	O43405
COG1	Q8WTW3
COG3	Q96JB2
COL10A1	Q03692
COL11A1	P12107
COL11A2	P13942
COL12A1	Q99715
COL14A1	Q05707
COL15A1	P39059
COL16A1	Q07092
COL18A1	P39060
COL19A1	Q14993
COL1A1	P02452
COL1A2	P08123
COL20A1	Q9P218
COL21A1	Q96P44
COL22A1	Q8NFW1
COL24A1	Q17RW2
COL25A1	Q9BXS0
COL26A1	Q96A83
COL27A1	Q8IZC6
COL28A1	Q2UY09
COL2A1	P02458
COL3A1	P02461
COL4A1	P02462
COL4A3	Q01955
COL4A3BP	Q9Y5P4
COL4A4	P53420
COL4A5	P29400
COL4A6	Q14031
COL5A1	P20908
COL5A2	P05997
COL5A3	P25940
COL6A1	P12109
COL6A2	P12110
COL6A3	P12111
COL6A5
COL6A6	A6NMZ7
COL7A1	Q02388
COL8A1	P27658
COL8A2	P25067
COL9A1	P20849
COL9A2	Q14055
COL9A3	Q14050
COLEC10	Q9Y6Z7
COLEC11	Q9BWP8
COLGALT1	Q8NBJ5
COLGALT2	Q8IYK4
COLQ	Q9Y215
COMMD3-BMI1
COMP	P49747
COMTD1	Q86VU5
COP1	Q8NHY2
COPS6	Q7L5N1
COQ6	Q9Y2Z9
CORT	O00230
COX6A2	Q02221
COX7A1	P24310
COX7A2L	O14548
CP	P00450
CPA1	P15085
CPA2	P48052
CPA3	P15088
CPA4	Q9UI42
CPA5	Q8WXQ8
CPA6	Q8N4T0
CPAMD8	Q8IZJ3
CPB1	P15086
CPB2	Q96IY4
CPE	P16870
CPEB1	Q9BZB8
CPM	P14384
CPN1	P15169
CPN2	P22792
CPQ	Q9Y646
CPVL	Q9H3G5
CPXM1	Q96SM3
CPXM2	Q8N436
CPZ	Q66K79
CR1L	Q2VPA4
CRB2	Q5IJ48
CREG1	O75629
CREG2	Q8IUH2
CRELD1	Q96HD1
CRELD2	Q6UXH1
CRH	P06850
CRHBP	P24387
CRHR1	P34998
CRHR2	Q13324
CRISP1	P54107
CRISP2	P16562
CRISP3	P54108
CRISPLD1	Q9H336
CRISPLD2	Q9H0B8
CRLF1	O75462
CRP	P02741
CRTAC1	Q9NQ79
CRTAP	O75718
CRY2	Q49AN0
CSDE1	O75534
CSF1	P09603
CSF1R	P07333
CSF2	P04141
CSF2RA	P15509
CSF3	P09919
CSF3R	Q99062
CSGALNACT1	Q8TDX6
CSGALNACT2	Q8N6G5
CSH1	P0DML2
CSH2	P0DML3
CSHL1	Q14406
CSN1S1	P47710
CSN2	P05814
CSN3	P07498
CST1	P01037
CST11	Q9H112
CST2	P09228
CST3	P01034
CST4	P01036
CST5	P28325
CST6	Q15828
CST7	O76096
CST8	O60676
CST9	Q5W186
CST9L	Q9H4G1
CSTL1	Q9H114
CTAGE5	O15320, Q96PC5
CTBS	Q01459
CTDP1	Q9Y5B0
CTGF	P29279
CTHRC1	Q96CG8
CTLA4	P16410
CTNS	O60931
CTRB1	P17538
CTRB2	Q6GPI1
CTRC	Q99895
CTRL	P40313
CTSA	P10619
CTSB	P07858
CTSC	P53634
CTSD	P07339
CTSE	P14091
CTSF	Q9UBX1
CTSG	P08311
CTSH	P09668
CTSK	P43235
CTSL	P07711
CTSO	P43234
CTSS	P25774
CTSV	O60911
CTSW	P56202
CTSZ	Q9UBR2
CUBN	O60494
CUL7	Q14999
CUTA	O60888
CX3CL1	P78423
CXADR	P78310
CXCL1	P09341
CXCL10	P02778
CXCL11	O14625
CXCL12	P48061
CXCL13	O43927
CXCL14	O95715
CXCL17	Q6UXB2
CXCL2	P19875
CXCL3	P19876
CXCL5	P42830
CXCL6	P80162
CXCL8	P10145
CXCL9	Q07325
CXorf36	Q9H7Y0
CXorf38	Q8TB03
CXXC5	Q7LFL8
CYB5D2	Q8WUJ1
CYBA	P13498
CYHR1	Q6ZMK1
CYP17A1	P05093
CYP19A1	P11511
CYP21A2	P08686
CYP26B1	Q9NR63
CYP2A13	Q16696
CYP2A6	P11509
CYP2A7	P20853
CYP2B6	P20813
CYP2C18	P33260
CYP2C19	P33261
CYP2C8	P10632
CYP2C9	P11712
CYP2E1	P05181
CYP2F1	P24903
CYP2J2	P51589
CYP2R1	Q6VVX0
CYP2S1	Q96SQ9
CYP2W1	Q8TAV3
CYP3A5	P20815
CYP7A1	P22680
CYR61	O00622
CYTL1	Q9NRR1
D2HGDH	Q8N465
DAG1	Q14118
DAND5	Q8N907
DAO	P14920
DAZAP2	Q15038
DAZL	Q92904
DBH	P09172
DBNDD2	Q9BQY9
DBNL	Q9UJU6
DBX1	A6NMT0
DCAF15	Q66K64
DCD	P81605
DCN	P07585
DCP2	Q8IU60
DDIAS	Q8IXT1
DDOST	P39656
DDR1	Q08345
DDR2	Q16832
DDT	P30046
DDX17	Q92841
DDX20	Q9UHI6
DDX25	Q9UHL0
DDX3X	O00571
DEAF1	O75398
DEF8	Q6ZN54
DEFA1	P59665
DEFA1B	P59665
DEFA3	P59666
DEFA4	P12838
DEFA5	Q01523
DEFA6	Q01524
DEFB1	P60022
DEFB103A	P81534
DEFB103B	P81534
DEFB104A	Q8WTQ1
DEFB104B	Q8WTQ1
DEFB105A	Q8NG35
DEFB105B	Q8NG35
DEFB106A	Q8N104
DEFB106B	Q8N104
DEFB107A	Q8IZN7
DEFB107B	Q8IZN7
DEFB108B	Q8NET1
DEFB110	Q30KQ9
DEFB113	Q30KQ7
DEFB115	Q30KQ5
DEFB116	Q30KQ4
DEFB118	Q96PH6
DEFB119	Q8N690
DEFB121	Q5J5C9
DEFB123	Q8N688
DEFB124	Q8NES8
DEFB125	Q8N687
DEFB126	Q9BYW3
DEFB127	Q9H1M4
DEFB128	Q7Z7B8
DEFB129	Q9H1M3
DEFB130A	P0DP74
DEFB130B	P0DP73
DEFB131A	P59861
DEFB131B	A0A096LNP1
DEFB132	Q7Z7B7
DEFB133	Q30KQ1
DEFB134	Q4QY38
DEFB135	Q30KP9
DEFB136	Q30KP8
DEFB4A	O15263
DEFB4B	O15263
DENND3	A2RUS2
DENND5A	Q6IQ26
DENND5B	Q6ZUT9
DENND6A	Q8IWF6
DEPP1	Q9NTK1
DERL3	Q96Q80
DEUP1	Q05D60
DGKD	Q16760
DGKH	Q86XP1
DGKI	O75912
DHFR	P00374
DHFR2	Q86XF0
DHH	O43323
DHRS7	Q9Y394
DHRS7C	A6NNS2
DHRS9	Q9BPW9
DHRSX	Q8N5I4
DHX29	Q7Z478
DHX30	Q7L2E3
DHX8	Q14562
DIAPH1	O60610
DICER1	Q9UPY3
DIO2	Q92813
DIRAS3	O95661
DIRC3
DIXDC1	Q155Q3
DKK1	O94907
DKK2	Q9UBU2
DKK3	Q9UBP4
DKK4	Q9UBT3
DKKL1	Q9UK85
DLK1	P80370
DLL1	O00548
DLL3	Q9NYJ7
DMBT1	Q9UGM3
DMKN	Q6E0U4
DMP1	Q13316
DMRT1	Q9Y5R6
DMRTA2	Q96SC8
DNAAF3
DNAH10	Q8IVF4
DNAH14	Q0VDD8
DNAJB13	P59910
DNAJC18	Q9H819
DNAJC25-GNG10
DNAJC3	Q13217
DNASE1	P24855
DNASE1L1	P49184
DNASE1L2	Q92874
DNASE1L3	Q13609
DNASE2	O00115
DNASE2B	Q8WZ79
DNM2	P50570
DNMT1	P26358
DOK3	Q7L591
DOT1L	Q8TEK3
DPEP2	Q9H4A9
DPF3	Q92784
DPP7	Q9UHL4
DPT	Q07507
DRAM1	Q8N682
DRAXIN	Q8NBI3
DSE	Q9UL01
DSG2	Q14126
DSN1	Q9H410
DSPP	Q9NZW4
DST	Q03001
DUOX1	Q9NRD9
DYNLRB1	Q9NP97
DYNLT3	P51808
DZIP1	Q86YF9
E2F1	Q01094
E2F3	O00716
EBI3	Q14213
ECHDC1	Q9NTX5
ECM1	Q16610
ECM2	O94769
ECSIT	Q9BQ95
EDDM3A	Q14507
EDDM3B	P56851
EDEM2	Q9BV94
EDEM3	Q9BZQ6
EDIL3	O43854
EDN1	P05305
EDN2	P20800
EDN3	P14138
EFCAB12	Q6NXP0
EFEMP1	Q12805
EFEMP2	O95967
EFNA1	P20827
EFNA2	O43921
EFNA4	P52798
EGFL7	Q9UHF1
EGFL8	Q99944
EGFR	P00533
EHBP1	Q8NDI1
EHMT1	Q9H9B1
EHMT2	Q96KQ7
EIF2AK1	Q9BQI3
EIF2B4	Q9UI10
ELANE	P08246
ELN	P15502
ELP2	Q6IA86
ELP5	Q8TE02
ELSPBP1	Q96BH3
EMC10	Q5UCC4
EMC4	Q5J8M3
EMC9	Q9Y3B6
EMCN	Q9ULC0
EMID1	Q96A84
EMILIN1	Q9Y6C2
EMILIN2	Q9BXX0
EMILIN3	Q9NT22
ENAM	Q9NRM1
ENDOG	Q14249
ENDOU	P21128
ENHO	Q6UWT2
ENO4	A6NNW6
ENOSF1	Q7L5Y1
ENPP3	O14638
ENPP6	Q6UWR7
ENPP7	Q6UWV6
ENTPD5	O75356
ENTPD8	Q5MY95
EOGT	Q5NDL2
EPCAM	P16422
EPDR1	Q9UM22
EPG5	Q9HCE0
EPGN	Q6UW88
EPHA10	Q5JZY3
EPHA3	P29320
EPHA4	P54764
EPHA6	Q9UF33
EPHA7	Q15375
EPHA8	P29322
EPHB2	P29323
EPHB4	P54760
EPHX2	P34913
EPHX3	Q9H6B9
EPM2A	O95278
EPO	P01588
EPPIN	O95925
EPPIN-WFDC6	O95925
EPS15	P42566
EPS8L1	Q8TE68
EPX	P11678
EPYC	Q99645
ERAP1	Q9NZ08
ERAP2	Q6P179
ERBB3	P21860
ERCC1	P07992
ERFE	Q4G0M1
ERI3	O43414
ERLEC1	Q96DZ1
ERLIN1	O75477
ERLIN2	O94905
ERMAP	Q96PL5
ERN1	O75460
ERN2	Q76MJ5
ERO1A	Q96HE7
ERO1B	Q86YB8
ERP27	Q96DN0
ERP29	P30040
ERP44	Q9BS26
ERV3-1	Q14264
ERVK3-1
ESM1	Q9NQ30
ESPN	B1AK53
ESPNL	Q6ZVH7
ESRP1	Q6NXG1
ETNK1	Q9HBU6
ETV6	P41212
EVA1A	Q9H8M9
EVA1B	Q9NVM1
EVX1	P49640
EXD3	Q8N9H8
EXOG	Q9Y2C4
EXTL1	Q92935
EXTL2	Q9UBQ6
F10	P00742
F11	P03951
F12	P00748
F13B	P05160
F2	P00734
F2R	P25116
F2RL3	Q96RI0
F3	P13726
F5	P12259
F7	P08709
F8	P00451
F8A1	P23610
F8A2	P23610
F8A3	P23610
F9	P00740
FAAP24	Q9BTP7
FABP6	P51161
FADS2	O95864
FAIM	Q9NVQ4
FAM102A	Q5T9C2
FAM107B	Q9H098
FAM118A	Q9NWS6
FAM118B	Q9BPY3
FAM131A	Q6UXB0
FAM160B1	Q5W0V3
FAM160B2	Q86V87
FAM171A1	Q5VUB5
FAM171B	Q6P995
FAM172A	Q8WUF8
FAM177A1	Q8N128
FAM180A	Q6UWF9
FAM180B
FAM189A1	O60320
FAM198A	Q9UFP1
FAM19A1	Q7Z5A9
FAM19A2	Q8N3H0
FAM19A3	Q7Z5A8
FAM19A4	Q96LR4
FAM19A5	Q7Z5A7
FAM206A	Q9NX38
FAM20A	Q96MK3
FAM20C	Q8IXL6
FAM231C	P0DMU3, P0DMU4, P0DMU5
FAM237A	A0A1B0GTK4
FAM24A	A6NFZ4
FAM24B	Q8N5W8
FAM46B	Q96A09
FAM57A	Q8TBR7
FAM57B	Q71RH2
FAM72B	Q86X60
FAM78A	Q5JUQ0
FAM96A	Q9H5X1
FAM98B	Q52LJ0
FAM9B	Q8IZU0
FANCA	O15360
FAP	Q12884
FAS	P25445
FAT1	Q14517
FBLN1	P23142
FBLN2	P98095
FBLN5	Q9UBX5
FBLN7	Q53RD9
FBN1	P35555
FBN2	P35556
FBXL18	Q96ME1
FBXL19	Q6PCT2
FBXO45	P0C2W1
FBXW7	Q969H0
FCAR	P24071
FCER2	P06734
FCGBP
FCGR1B	Q92637
FCGR3A	P08637
FCGRT	P55899
FCMR	O60667
FCN1	O00602
FCN2	Q15485
FCN3	O75636
FCRL1	Q96LA6
FCRL3	Q96P31
FCRL5	Q96RD9
FCRL6	Q6DN72
FCRLA	Q7L513
FCRLB	Q6BAA4
FDCSP	Q8NFU4
FDXACB1	Q9BRP7
FETUB	Q9UGM5
FGA	P02671
FGB	P02675
FGF10	O15520
FGF17	O60258
FGF18	O76093
FGF19	O95750
FGF21	Q9NSA1
FGF22	Q9HCT0
FGF23	Q9GZV9
FGF3	P11487
FGF4	P08620
FGF5	P12034
FGF6	P10767
FGF7	P21781
FGF8	P55075
FGFBP1	Q14512
FGFBP2	Q9BYJ0
FGFBP3	Q8TAT2
FGFR1	P11362
FGFR2	P21802
FGFR3	P22607
FGFR4	P22455
FGFRL1	Q8N441
FGG	P02679
FGL1	Q08830
FGL2	Q14314
FHL1	Q13642
FHOD3	Q2V2M9
FIBCD1	Q8N539
FIBIN	Q8TAL6
FICD	Q9BVA6
FJX1	Q86VR8
FKBP10	Q96AY3
FKBP11	Q9NYL4
FKBP14	Q9NWM8
FKBP2	P26885
FKBP7	Q9Y680
FKBP9	O95302
FKRP	Q9H9S5
FLT1	P17948
FLT4	P35916
FMN1	Q68DA7
FMO2	Q99518
FMO3	P31513
FMO5	P49326
FMOD	Q06828
FN1	P02751
FNDC1	Q4ZHG4
FNDC7	Q5VTL7
FNIP1	Q8TF40
FOCAD	Q5VW36
FOLR2	P14207
FOLR3	P41439
FOXK1	P85037
FOXK2	Q01167
FOXP3	Q9BZS1
FOXRED2	Q8IWF2
FP565260.6
FPGS	Q05932
FRAS1	Q86XX4
FREM1	Q5H8C1
FREM3	P0C091
FRMPD2	Q68DX3
FRZB	Q92765
FSHB	P01225
FSHR	P23945
FST	P19883
FSTL1	Q12841
FSTL3	O95633
FSTL4	Q6MZW2
FSTL5	Q8N475
FTCDNL1	E5RQL4
FTO	Q9C0B1
FUCA1	P04066
FUCA2	Q9BTY2
FURIN	P09958
FUT10	Q6P4F1
FUT11	Q495W5
FUT6	P51993
FUT7	Q11130
FUZ	Q9BT04
FXN	Q16595
FXYD3	Q14802
FYTTD1	Q96QD9
G0S2	P27469
GABBR1	Q9UBS5
GABRA1	P14867
GABRA2	P47869
GABRA5	P31644
GABRD	O14764
GABRG2	P18507
GABRG3	Q99928
GABRP	O00591
GAK	O14976
GAL	P22466
GAL3ST1	Q99999
GAL3ST2	Q9H3Q3
GAL3ST3	Q96A11
GALC	P54803
GALNS	P34059
GALNT1	Q10472
GALNT10	Q86SR1
GALNT12	Q8IXK2
GALNT13	Q8IUC8
GALNT15	Q8N3T1
GALNT16	Q8N428
GALNT2	Q10471
GALNT3	Q14435
GALNT6	Q8NCL4
GALNT7	Q86SF2
GALNT8	Q9NY28, P17658
GALNTL6	Q49A17
GALP	Q9UBC7
GANAB	Q14697
GAPT	Q8N292
GARNL3	Q5VVW2
GARS	P41250
GAS1	P54826
GAS6	Q14393
GAST	P01350
GATD1	Q8NB37
GBA	P04062
GBA2	Q9HCG7
GBGT1	Q8N5D6
GC	P02774
GCG	P01275
GCGR	P47871
GCNT7	Q6ZNI0
GCSH	P23434
GDF1	P27539
GDF10	P55107
GDF11	O95390
GDF15	Q99988
GDF2	Q9UK05
GDF3	Q9NR23
GDF5	P43026
GDF6	Q6KF10
GDF7	Q7Z4P5
GDF9	O60383
GDNF	P39905
GFAP	P14136
GFOD2	Q3B7J2
GFRA2	O00451
GFRA4	Q9GZZ7
GGA2	Q9UJY4
GGH	Q92820
GGT1	P19440
GGT5	P36269
GH1	P01241
GH2	P01242
GHDC	Q8N2G8
GHRH	P01286
GHRHR	Q02643
GHRL	Q9UBU3
GIF	P27352
GIMAP2	Q9UG22
GIP	P09681
GKAP1	Q5VSY0
GKN1	Q9NS71
GKN2	Q86XP6
GLA	P06280
GLB1	P16278
GLB1L	Q6UWU2
GLB1L2	Q8IW92
GLB1L3	Q8NCI6
GLCE	O94923
GLDC	P23378
GLG1	Q92896
GLI2	P10070
GLIPR1	P48060
GLIPR1L1	Q6UWM5
GLIPR1L2	Q4G1C9
GLIS3	Q8NEA6
GLMP	Q8WWB7
GLRB	P48167
GLS	O94925
GLT6D1	Q7Z4J2
GLTPD2	A6NH11
GLUD1	P00367
GLUD2	P49448
GM2A	P17900
GML	Q99445
GMPPA	Q96IJ6
GNAS	O95467, P63092, P84996, Q5JWF2
GNLY	P22749
GNPTG	Q9UJJ9
GNRH1	P01148
GNRH2	O43555
GNS	P15586
GOLM1	Q8NBJ4
GOT2	P00505
GP2	P55259
GP6	Q9HCN6
GPC2	Q8N158
GPC5	P78333
GPC6	Q9Y625
GPD2	P43304
GPER1	Q99527
GPHA2	Q96T91
GPHB5	Q86YW7
GPIHBP1	Q8IV16
GPLD1	P80108
GPN3	Q9UHW5
GPNMB	Q14956
GPR108	Q9NPR9
GPR146	Q96CH1
GPR162	Q16538
GPR19	Q15760
GPRC5B	Q9NZH0
GPX3	P22352
GPX4	P36969
GPX5	O75715
GPX6	P59796
GPX7	Q96SL4
GPX8	Q8TED1
GRAMD1C	Q8IYS0
GREM1	O60565
GREM2	Q9H772
GRIA2	P42262
GRIA3	P42263
GRIA4	P48058
GRIK2	Q13002
GRIN2A	Q12879
GRIN2B	Q13224
GRM2	Q14416
GRM3	Q14832
GRM5	P41594
GRM8	O00222
GRN	P28799
GRP	P07492
GRSF1	Q12849
GSAP	A4D1B5
GSDME	O60443
GSE1	Q14687
GSG1	Q2KHT4
GSN	P06396
GSPT1	P15170
GSTM4	Q03013
GSX2	Q9BZM3
GTDC1	Q4AE62
GTF3C3	Q9Y5Q9
GTPBP10	A4D1E9
GTPBP3	Q969Y2
GUCA2A	Q02747
GUCA2B	Q16661
GUSB	P08236
GXYLT1	Q4G148
GXYLT2	A0PJZ3
GYPB	P06028
GZMA	P12544
GZMB	P10144
GZMH	P20718
GZMK	P49863
GZMM	P51124
H6PD	O95479
HABP2	Q14520
HACD1	B0YJ81
HADHB	P55084
HAMP	P81172
HAPLN1	P10915
HAPLN2	Q9GZV7
HAPLN3	Q96S86
HAPLN4	Q86UW8
HAVCR1	Q96D42
HCCS	P53701
HCRT	O43612
HDAC6	Q9UBN7
HDHD5	Q9BXW7
HDLBP	Q00341
HEATR3	Q7Z4Q2
HEATR5A	Q86XA9
HECA	Q9UBI9
HECTD1	Q9ULT8
HEMK1	Q9Y5R4
HEPH	Q9BQS7
HEXA	P06865
HEXB	P07686
HEXDC	Q8WVB3
HFE2	Q6ZVN8
HGF	P14210
HGFAC	Q04756
HHIP	Q96QV1
HHIPL1	Q96JK4
HHIPL2	Q6UWX4
HHLA1	C9JL84
HHLA2	Q9UM44
HIBADH	P31937
HINT2	Q9BX68
HKR1	P10072
HLA-A	P04439, P13746, P16188
HLA-C	P10321
HLA-DOA	P06340
HLA-DPA1	P20036
HLA-DQA1	P01909
HLA-DQB1
HLA-DQB2	P05538
HMCN1	Q96RW7
HMCN2	Q8NDA2
HMGCL	P35914
HMSD	A8MTL9, P0C7T4
HNRNPDL	O14979
HOGA1	Q86XE5
HOXD13	P35453
HP	P00738
HP1BP3	Q5SSJ5
HPN	P05981
HPR	P00739
HPSE	Q9Y251
HPSE2	Q8WWQ2
HPX	P02790
HRC	P23327
HRCT1	Q6UXD1
HRG	P04196
HS2ST1	Q7LGA3
HS3ST1	O14792
HS3ST2	Q9Y278
HS3ST3A1	Q9Y663
HS3ST3B1	Q9Y662
HS3ST6	Q96QI5
HS6ST1	O60243
HS6ST3	Q8IZP7
HSD11B1	P28845
HSD11B1L	Q7Z5J1
HSD17B4	P51659
HSD17B7	P56937
HSP90B1	P14625
HSPA13	P48723
HSPA5	P11021
HSPBP1	Q9NZL4
HSPG2	P98160
HTATIP2	Q9BUP3
HTN1	P15515
HTN3	P15516
HTRA1	Q92743
HTRA3	P83110
HTRA4	P83105
HYAL1	Q12794
HYAL2	Q12891
HYAL3	O43820
HYAL4	Q2M3T9
HYOU1	Q9Y4L1
IAPP	P10997
IBSP	P21815
ICAM1	P05362
ICAM2	P13598
ICAM4	Q14773
ID1	P41134
IDE	P14735
IDH2	P48735
IDH3G	P51553
IDNK	Q5T6J7
IDS	P22304
IDUA	P35475
IER3IP1	Q9Y5U9
IFI27L1	Q96BM0
IFI27L2	Q9H2X8
IFI30	P13284
IFNA1	P01562
IFNA10	P01566
IFNA13	P01562
IFNA14	P01570
IFNA16	P05015
IFNA17	P01571
IFNA2	P01563
IFNA21	P01568
IFNA4	P05014
IFNA5	P01569
IFNA6	P05013
IFNA7	P01567
IFNA8	P32881
IFNAR1	P17181
IFNAR2	P48551
IFNB1	P01574
IFNE	Q86WN2
IFNG	P01579
IFNGR1	P15260
IFNK	Q9P0W0
IFNL1	Q8IU54
IFNL2	Q8IZJ0
IFNL3	Q8IZI9
IFNLR1	Q8IU57
IFNW1	P05000
IFRD1	O00458
IGF1	P05019
IGF2	P01344
IGF2
IGFALS	P35858
IGFBP1	P08833
IGFBP2	P18065
IGFBP3	P17936
IGFBP4	P22692
IGFBP5	P24593
IGFBP6	P24592
IGFBP7	Q16270
IGFBPL1	Q8WX77
IGFL1	Q6UW32
IGFL2	Q6UWQ7
IGFL3	Q6UXB1
IGFLR1	Q9H665
IGIP	A6NJ69
IGLL1	P15814
IGLL5	B9A064
IGLON5	A6NGN9
IGSF1	Q8N6C5
IGSF10	Q6WRI0
IGSF11	Q5DX21
IGSF21	Q96ID5
IGSF8	Q969P0
IGSF9	Q9P2J2
IGSF9B	Q9UPX0
IHH	Q14623
IKBIP	Q70UQ0
IL10	P22301
IL10RB	Q08334
IL11	P20809
IL11RA	Q14626
IL12B	P29460
IL12RB1	P42701
IL12RB2	Q99665
IL13	P35225
IL13RA1	P78552
IL15RA	Q13261
IL17A	Q16552
IL17B	Q9UHF5
IL17C	Q9P0M4
IL17D	Q8TAD2
IL17F	Q96PD4
IL17RA	Q96F46
IL17RC	Q8NAC3
IL17RE	Q8NFR9
IL18BP	O95998
IL18R1	Q13478
IL19	Q9UHD0
IL1R1	P14778
IL1R2	P27930
IL1RAP	Q9NPH3
IL1RL1	Q01638
IL1RL2	Q9HB29
IL1RN	P18510
IL2	P60568
IL20	Q9NYY1
IL20RA	Q9UHF4
IL21	Q9HBE4
IL22	Q9GZX6
IL22RA2	Q969J5
IL23A	Q9NPF7
IL24	Q13007
IL25	Q9H293
IL26	Q9NPH9
IL27	Q8NEV9
IL2RB	P14784
IL3	P08700
IL31	Q6EBC2
IL31RA	Q8NI17
IL32	P24001
IL3RA	P26951
IL4	P05112
IL4I1	Q96RQ9
IL4R	P24394
IL5	P05113
IL6	P05231
IL6R	P08887
IL6ST	P40189
IL7	P13232
IL7R	P16871
IL9	P15248
ILDR1	Q86SU0
ILDR2	Q71H61
ILVBL	A1L0T0
IMMP2L	Q96T52
IMP4	Q96G21
IMPA2	O14732
IMPG1	Q17R60
INHA	P05111
INHBA	P08476
INHBB	P09529
INHBC	P55103
INHBE	P58166
INIP	Q9NRY2
INPP5A	Q14642
INPPL1	O15357
INS	P01308
INS-IGF2	F8WCM5
INSL3	P51460
INSL4	Q14641
INSL5	Q9Y5Q6
INSL6	Q9Y581
INTS11	Q5TA45
INTS14	Q96SY0
INTS3	Q68E01
IPO11	Q9UI26
IPO8	O15397
IPO9	Q96P70
IQSEC2	Q5JU85
IRAK3	Q9Y616
IRS4	O14654
ISLR	O14498
ISLR2	Q6UXK2
ISM1	B1AKI9
ISM2	Q6H9L7
ISOC1	Q96CN7
ITGA4	P13612
ITGA9	Q13797
ITGAL	P20701
ITGAX	P20702
ITGB1	P05556
ITGB2	P05107
ITGB3	P05106
ITGB7	P26010
ITGBL1	O95965
ITIH1	P19827
ITIH2	P19823
ITIH3	Q06033
ITIH4	Q14624
ITIH5
ITIH6	Q6UXX5
ITLN1	Q8WWA0
ITLN2	Q8WWU7
ITPKA	P23677
IZUMO1R	A6ND01
IZUMO4	Q1ZYL8
JAK2	O60674
JAML	Q86YT9
JCHAIN	P01591
JMJD8	Q96S16
JPT2	Q9H910
KANSL2	Q9H9L4
KANTR
KAT14	Q9H8E8
KAT2B	Q92831
KAT8	Q9H7Z6
KAZALD1	Q96I82
KCNIP3	Q9Y2W7
KCNK7	Q9Y2U2
KCNN4	O15554
KCNU1	A8MYU2
KCP
KCTD9	Q7L273
KDELC1	Q6UW63
KDELC2	Q7Z4H8
KDM1A	O60341
KDM3B	Q7LBC6
KDM6A	O15550
KDM7A	Q6ZMT4
KEL	P23276
KERA	O60938
KIAA0040	Q15053
KIAA0100	Q14667
KIAA0319	Q5VV43
KIAA0319L	Q8IZA0
KIAA0930	Q6ICG6
KIAA1324	Q6UXG2
KIAA1522	Q9P206
KIAA1755	Q5JYT7
KIR2DL4	Q99706
KIR3DX1
KIRREL2	Q6UWL6
KISS1	Q15726
KLF5	Q13887
KLHDC7A	Q5VTJ3
KLHL11	Q9NVR0
KLK1	P06870
KLK10	O43240
KLK11	Q9UBX7
KLK12	Q9UKR0
KLK13	Q9UKR3
KLK14	Q9P0G3
KLK15	Q9H2R5
KLK2	P20151
KLK3	P07288
KLK4	Q9Y5K2
KLK5	Q9Y337
KLK6	Q92876
KLK7	P49862
KLK8	O60259
KLK9	Q9UKQ9
KLKB1	P03952
KMT2A	Q03164
KMT5A	Q9NQR1
KNDC1	Q76NI1
KNG1	P01042
KNTC1	P50748
KRBA1	A5PL33
KRBA2	Q6ZNG9
KREMEN2	Q8NCW0
KRT17	Q04695
KRTDAP	P60985
L1CAM	P32004
L3MBTL2	Q969R5
LACRT	Q9GZZ8
LACTB	P83111
LAG3	P18627
LAIR2	Q6ISS4
LALBA	P00709
LAMA1	P25391
LAMA2	P24043
LAMA3	Q16787
LAMA4	Q16363
LAMA5	O15230
LAMB1	P07942
LAMB2	P55268
LAMB3	Q13751
LAMB4	A4D0S4
LAMC1	P11047
LAMC3	Q9Y6N6
LAMP3	Q9UQV4
LAMTOR4	Q0VGL1
LARGE1	O95461
LARGE2	Q8N3Y3
LAT	O43561
LAT2	Q9GZY6
LATS1	O95835
LBP	P18428
LCAT	P04180
LCMT1	Q9UIC8
LCN1	P31025
LCN10	Q6JVE6
LCN12	Q6JVE5
LCN15	Q6UWW0
LCN2	P80188
LCN6	P62502
LCN8	Q6JVE9
LCN9	Q8WX39
LCOR	Q96JN0
LCORL	Q8N3X6
LDHA	P00338
LDHAL6B	Q9BYZ2
LDLR	P01130
LDLRAD2	Q5SZI1
LEAP2	Q969E1
LECT2	O14960
LEFTY1	O75610
LEFTY2	O00292
LENG8	Q96PV6
LEP	P41159
LFNG	Q8NES3
LGALS3BP	Q08380
LGI1	O95970
LGI2	Q8N0V4
LGI3	Q8N145
LGI4	Q8N135
LGMN	Q99538
LGR4	Q9BXB1
LHB	P01229
LHCGR	P22888
LHX6	Q9UPM6
LIF	P15018
LIFR	P42702
LILRA2	Q8N149
LILRB3	O75022
LILRB4	Q8NHJ6
LIME1	Q9H400
LINGO1	Q96FE5
LIPA	P38571
LIPC	P11150
LIPE	Q05469
LIPF	P07098
LIPG	Q9Y5X9
LIPH	Q8WWY8
LIPK	Q5VXJ0
LIPM	Q5VYY2
LIPN	Q5VXI9
LITAF	Q99732
LIX1L	Q8IVB5
LMAN2	Q12907
LMNTD1	Q8N9Z9
LNX1	Q8TBB1
[truncated: 1,711 more rows]

## Sheet: SecretomeP
Genes	Neural Network Score	Odds Ratio
ATP5F1A	0.637714	2.55114
CNN2	0.542571	1.31529
EWSR1	0.3	0.705667
FN1	0.377059	0.717353
H2AC11	0.536	1.783
H2AC20	0.457	1.257
H2AC4	0.536	1.76
H2AC6	0.502	1.57
H2AC7	0.532	1.737
H2AJ	0.697	2.57567
H2AW	0.497	1.524
H2AX	0.535	1.747
H2AZ2	0.627714	2.42614
KRT8	0.497	1.5796
LSM3	0.566	1.895
MYL6B	0.786	3.616
NUCKS1	0.3725	0.71
PEA15	0.885667	5.28867
PRDX4	0.6585	2.014
PSMB6	0.563	1.257
RPS15	0.552125	1.90413
SEPTIN11	0.1036	0.2204
SEPTIN6	0.1956	0.7728
SEPTIN7	0.454857	0.921429
SEPTIN8	0.235	0.674444
SFN	0.3305	0.6185
SPTAN	0.2532	0.5086
SFSF2	0.422	1.116
TXN	0.466	0.963
TXNDC12	0.836	4.215
YWHAB	0.677333	2.99967
YWHAG	0.334	0.637
YWHAH	0.348	0.6575
