# Supplementary material for: Breast Cancer Cell Secretome Analysis to Decipher miRNA Tumor Biology and Discover Potential Biomarkers
Source: Research Square preprint supplement (doi:10.21203/rs.3.rs-1328838/v1), 2022-02-07
Supplement: Supplementary file 6 [file fd31b0e66c08ffa4423ae05c.xlsx]

## Sheet: Cellular Component 1535
Analysis Type:	PANTHER Overrepresentation Test (Released 20210224)
Annotation Version and Release Date:	GO Ontology database DOI: 10.5281/zenodo.5228828 Released 2021-08-18
Analyzed List:	upload_1 (Homo sapiens)
Reference List:	Homo sapiens (all genes in database)
Test Type:	FISHER
Correction:	FDR
GO cellular component complete	Homo sapiens - REFLIST (20595)	upload_1 (427)	upload_1 (expected)	upload_1 (over/under)	upload_1 (fold Enrichment)	upload_1 (raw P-value)	upload_1 (FDR)
cellular_component (GO:0005575)	18866	424	391.15	+	1.08	1.72e-12	5.71e-11
cellular anatomical entity (GO:0110165)	18715	423	388.02	+	1.09	5.99e-13	2.05e-11
intracellular anatomical structure (GO:0005622)	14830	416	307.47	+	1.35	5.05e-44	8.37e-42
organelle (GO:0043226)	13912	412	288.44	+	1.43	5.2e-50	1.29e-47
membrane-bounded organelle (GO:0043227)	13085	394	271.29	+	1.45	1.31e-42	1.86e-40
intracellular organelle (GO:0043229)	13115	388	271.92	+	1.43	2.02e-37	2.68e-35
cytoplasm (GO:0005737)	11940	378	247.55	+	1.53	7.92e-43	1.21e-40
intracellular membrane-bounded organelle (GO:0043231)	12029	336	249.4	+	1.35	2.74e-18	1.36e-16
nucleus (GO:0005634)	7600	269	157.57	+	1.71	5.3e-27	3.9e-25
vesicle (GO:0031982)	3932	265	81.52	+	3.25	3.28e-82	1.3e-79
extracellular region (GO:0005576)	4373	257	90.67	+	2.83	2.95e-66	8.37e-64
cytosol (GO:0005829)	5394	257	111.83	+	2.3	3.94e-48	8.69e-46
intracellular non-membrane-bounded organelle (GO:0043232)	5088	248	105.49	+	2.35	2.22e-47	4.41e-45
non-membrane-bounded organelle (GO:0043228)	5088	248	105.49	+	2.35	2.22e-47	4.01e-45
extracellular space (GO:0005615)	3392	246	70.33	+	3.5	3.18e-80	1.05e-77
extracellular organelle (GO:0043230)	2120	237	43.95	+	5.39	1.4e-113	9.27e-111
extracellular vesicle (GO:1903561)	2118	237	43.91	+	5.4	1.15e-113	1.15e-110
extracellular exosome (GO:0070062)	2098	237	43.5	+	5.45	1.68e-114	3.34e-111
extracellular membrane-bounded organelle (GO:0065010)	2120	237	43.95	+	5.39	1.4e-113	6.95e-111
protein-containing complex (GO:0032991)	5424	234	112.46	+	2.08	1.79e-34	2.1e-32
organelle lumen (GO:0043233)	5541	212	114.88	+	1.85	5.95e-23	3.48e-21
intracellular organelle lumen (GO:0070013)	5541	212	114.88	+	1.85	5.95e-23	3.38e-21
membrane-enclosed lumen (GO:0031974)	5541	212	114.88	+	1.85	5.95e-23	3.28e-21
nuclear lumen (GO:0031981)	4419	153	91.62	+	1.67	1.89e-11	5.88e-10
nucleoplasm (GO:0005654)	4069	140	84.36	+	1.66	4.44e-10	1.19e-08
cytoskeleton (GO:0005856)	2355	136	48.83	+	2.79	1.4e-28	1.16e-26
cell junction (GO:0030054)	2103	112	43.6	+	2.57	2.29e-20	1.2e-18
supramolecular complex (GO:0099080)	1343	107	27.84	+	3.84	9.3e-33	9.72e-31
intracellular vesicle (GO:0097708)	2458	99	50.96	+	1.94	1.66e-10	4.64e-09
cytoplasmic vesicle (GO:0031410)	2455	99	50.9	+	1.94	1.61e-10	4.57e-09
cell projection (GO:0042995)	2362	91	48.97	+	1.86	1.09e-08	2.75e-07
plasma membrane bounded cell projection (GO:0120025)	2257	87	46.79	+	1.86	2.26e-08	5.55e-07
supramolecular fiber (GO:0099512)	1009	85	20.92	+	4.06	2.81e-27	2.23e-25
supramolecular polymer (GO:0099081)	1017	85	21.09	+	4.03	4.66e-27	3.56e-25
chromosome (GO:0005694)	1772	79	36.74	+	2.15	2.11e-10	5.83e-09
microtubule cytoskeleton (GO:0015630)	1319	75	27.35	+	2.74	6.54e-15	2.89e-13
anchoring junction (GO:0070161)	836	73	17.33	+	4.21	3.15e-24	2.09e-22
polymeric cytoskeletal fiber (GO:0099513)	777	64	16.11	+	3.97	4.9e-20	2.5e-18
secretory vesicle (GO:0099503)	1037	63	21.5	+	2.93	8.37e-14	3.39e-12
synapse (GO:0045202)	1347	62	27.93	+	2.22	1.14e-08	2.82e-07
focal adhesion (GO:0005925)	419	61	8.69	+	7.02	6.22e-31	5.61e-29
cell-substrate junction (GO:0030055)	426	61	8.83	+	6.91	1.41e-30	1.22e-28
actin cytoskeleton (GO:0015629)	516	59	10.7	+	5.51	5.79e-25	4.11e-23
chromatin (GO:0000785)	1206	58	25	+	2.32	6.06e-09	1.56e-07
secretory granule (GO:0030141)	869	57	18.02	+	3.16	7.54e-14	3.12e-12
neuron projection (GO:0043005)	1397	53	28.96	+	1.83	2.89e-05	0.000487
catalytic complex (GO:1902494)	1358	50	28.16	+	1.78	0.000117	0.00183
ribonucleoprotein complex (GO:1990904)	678	49	14.06	+	3.49	1.8e-13	6.76e-12
secretory granule lumen (GO:0034774)	321	46	6.66	+	6.91	3.35e-23	2.15e-21
cytoplasmic vesicle lumen (GO:0060205)	324	46	6.72	+	6.85	4.73e-23	2.94e-21
vesicle lumen (GO:0031983)	326	46	6.76	+	6.81	5.94e-23	3.58e-21
cell body (GO:0044297)	587	41	12.17	+	3.37	5.23e-11	1.55e-09
nuclear protein-containing complex (GO:0140513)	1147	41	23.78	+	1.72	0.000929	0.0125
cell cortex (GO:0005938)	322	39	6.68	+	5.84	1.55e-17	7.33e-16
microtubule (GO:0005874)	435	38	9.02	+	4.21	5.85e-13	2.04e-11
protein-DNA complex (GO:0032993)	168	37	3.48	+	10.62	1.82e-24	1.25e-22
perinuclear region of cytoplasm (GO:0048471)	751	37	15.57	+	2.38	3.44e-06	6.56e-05
nucleosome (GO:0000786)	76	35	1.58	+	22.21	3.25e-32	3.23e-30
DNA packaging complex (GO:0044815)	84	35	1.74	+	20.1	5.05e-31	4.78e-29
somatodendritic compartment (GO:0036477)	872	34	18.08	+	1.88	0.000633	0.00892
cell leading edge (GO:0031252)	428	33	8.87	+	3.72	4.28e-10	1.17e-08
axon (GO:0030424)	661	33	13.7	+	2.41	6.59e-06	0.00012
contractile fiber (GO:0043292)	241	31	5	+	6.2	8.19e-15	3.54e-13
ficolin-1-rich granule (GO:0101002)	185	31	3.84	+	8.08	1.12e-17	5.44e-16
ficolin-1-rich granule lumen (GO:1904813)	124	31	2.57	+	12.06	4.55e-22	2.44e-20
cell-cell junction (GO:0005911)	496	28	10.28	+	2.72	3.66e-06	6.85e-05
myofibril (GO:0030016)	233	28	4.83	+	5.8	7.63e-13	2.57e-11
sarcomere (GO:0030017)	212	25	4.4	+	5.69	1.92e-11	5.88e-10
neuronal cell body (GO:0043025)	515	25	10.68	+	2.34	0.000139	0.00215
melanosome (GO:0042470)	110	23	2.28	+	10.08	3.1e-15	1.43e-13
pigment granule (GO:0048770)	110	23	2.28	+	10.08	3.1e-15	1.4e-13
cortical cytoskeleton (GO:0030863)	122	22	2.53	+	8.7	1.77e-13	6.77e-12
intrinsic component of membrane (GO:0031224)	5947	21	123.3	-	0.17	4.33e-36	5.38e-34
chromosomal region (GO:0098687)	336	21	6.97	+	3.01	1.48e-05	0.000254
distal axon (GO:0150034)	301	21	6.24	+	3.37	3.04e-06	5.98e-05
ribosome (GO:0005840)	230	21	4.77	+	4.4	5.02e-08	1.2e-06
integral component of membrane (GO:0016021)	5787	21	119.98	-	0.18	2e-34	2.21e-32
ribonucleoprotein granule (GO:0035770)	256	21	5.31	+	3.96	2.66e-07	5.94e-06
cytoplasmic ribonucleoprotein granule (GO:0036464)	238	20	4.93	+	4.05	3.6e-07	7.86e-06
blood microparticle (GO:0072562)	143	20	2.96	+	6.75	1.37e-10	3.94e-09
actin filament (GO:0005884)	118	20	2.45	+	8.17	6.18e-12	1.98e-10
actin filament bundle (GO:0032432)	80	20	1.66	+	12.06	1.11e-14	4.69e-13
spliceosomal complex (GO:0005681)	193	19	4	+	4.75	7.39e-08	1.75e-06
actomyosin (GO:0042641)	82	19	1.7	+	11.18	1.67e-13	6.52e-12
lamellipodium (GO:0030027)	205	19	4.25	+	4.47	1.76e-07	4.07e-06
spindle (GO:0005819)	393	19	8.15	+	2.33	0.00103	0.0136
contractile actin filament bundle (GO:0097517)	72	18	1.49	+	12.06	2.41e-13	8.86e-12
stress fiber (GO:0001725)	72	18	1.49	+	12.06	2.41e-13	8.7e-12
cortical actin cytoskeleton (GO:0030864)	93	18	1.93	+	9.34	1.02e-11	3.23e-10
I band (GO:0031674)	142	17	2.94	+	5.77	2.73e-08	6.62e-07
ribosomal subunit (GO:0044391)	182	17	3.77	+	4.51	7.09e-07	1.51e-05
site of polarized growth (GO:0030427)	188	16	3.9	+	4.1	4.58e-06	8.51e-05
growth cone (GO:0030426)	182	16	3.77	+	4.24	3.12e-06	6.07e-05
adherens junction (GO:0005912)	171	16	3.55	+	4.51	1.47e-06	3.08e-05
Golgi apparatus (GO:0005794)	1599	16	33.15	-	0.48	0.00122	0.016
cytosolic ribosome (GO:0022626)	103	16	2.14	+	7.49	2.53e-09	6.6e-08
midbody (GO:0030496)	196	15	4.06	+	3.69	2.91e-05	0.000486
Z disc (GO:0030018)	130	15	2.7	+	5.57	2.78e-07	6.13e-06
endoplasmic reticulum lumen (GO:0005788)	313	15	6.49	+	2.31	0.00421	0.0498
catalytic step 2 spliceosome (GO:0071013)	87	15	1.8	+	8.32	2.25e-09	5.97e-08
vacuolar lumen (GO:0005775)	173	14	3.59	+	3.9	3.02e-05	0.000501
cluster of actin-based cell projections (GO:0098862)	165	13	3.42	+	3.8	7.45e-05	0.00118
condensed chromosome (GO:0000793)	244	13	5.06	+	2.57	0.00242	0.03
chromosome, centromeric region (GO:0000775)	199	13	4.13	+	3.15	0.000419	0.00612
ruffle (GO:0001726)	180	13	3.73	+	3.48	0.000168	0.00255
brush border (GO:0005903)	109	12	2.26	+	5.31	6.72e-06	0.000121
chaperone complex (GO:0101031)	29	12	0.6	+	19.96	1.96e-11	5.91e-10
small ribosomal subunit (GO:0015935)	73	12	1.51	+	7.93	1.46e-07	3.41e-06
proteasome complex (GO:0000502)	61	11	1.26	+	8.7	2.12e-07	4.79e-06
endopeptidase complex (GO:1905369)	67	11	1.39	+	7.92	4.89e-07	1.06e-05
peptidase complex (GO:1905368)	100	11	2.07	+	5.31	1.64e-05	0.000278
cytosolic small ribosomal subunit (GO:0022627)	43	11	0.89	+	12.34	9.33e-09	2.38e-07
sarcolemma (GO:0042383)	139	10	2.88	+	3.47	0.000958	0.0128
azurophil granule lumen (GO:0035578)	90	10	1.87	+	5.36	3.66e-05	0.0006
chromosome, telomeric region (GO:0000781)	149	10	3.09	+	3.24	0.00157	0.0203
microtubule associated complex (GO:0005875)	162	10	3.36	+	2.98	0.00279	0.0342
polysome (GO:0005844)	67	10	1.39	+	7.2	3.51e-06	6.64e-05
azurophil granule (GO:0042582)	154	10	3.19	+	3.13	0.00197	0.0251
cell division site (GO:0032153)	71	10	1.47	+	6.79	5.59e-06	0.000103
primary lysosome (GO:0005766)	154	10	3.19	+	3.13	0.00197	0.0249
myelin sheath (GO:0043209)	51	9	1.06	+	8.51	3.2e-06	6.17e-05
filopodium (GO:0030175)	107	9	2.22	+	4.06	0.000608	0.00862
condensed chromosome, centromeric region (GO:0000779)	144	9	2.99	+	3.01	0.00413	0.0491
chaperonin-containing T-complex (GO:0005832)	11	9	0.23	+	39.46	7.46e-11	2.18e-09
nuclear periphery (GO:0034399)	133	9	2.76	+	3.26	0.00251	0.031
myosin complex (GO:0016459)	57	8	1.18	+	6.77	4.98e-05	0.00081
platelet alpha granule (GO:0031091)	91	8	1.89	+	4.24	0.000927	0.0125
polysomal ribosome (GO:0042788)	33	7	0.68	+	10.23	1.42e-05	0.000245
heterochromatin (GO:0000792)	75	7	1.55	+	4.5	0.00139	0.0182
myosin II complex (GO:0016460)	20	7	0.41	+	16.88	8.49e-07	1.79e-05
platelet alpha granule lumen (GO:0031093)	67	7	1.39	+	5.04	0.000758	0.0105
cleavage furrow (GO:0032154)	53	7	1.1	+	6.37	0.000207	0.0031
actin cortical patch (GO:0030479)	15	6	0.31	+	19.29	2.84e-06	5.76e-05
septin ring (GO:0005940)	14	6	0.29	+	20.67	2.06e-06	4.27e-05
septin complex (GO:0031105)	14	6	0.29	+	20.67	2.06e-06	4.23e-05
proteasome core complex (GO:0005839)	20	6	0.41	+	14.47	1.11e-05	0.000193
endocytic patch (GO:0061645)	15	6	0.31	+	19.29	2.84e-06	5.7e-05
septin cytoskeleton (GO:0032156)	15	6	0.31	+	19.29	2.84e-06	5.64e-05
zona pellucida receptor complex (GO:0002199)	8	6	0.17	+	36.17	1.77e-07	4.05e-06
smooth endoplasmic reticulum (GO:0005790)	34	6	0.7	+	8.51	0.000145	0.00223
myosin filament (GO:0032982)	22	5	0.46	+	10.96	0.000189	0.00284
myofilament (GO:0036379)	27	5	0.56	+	8.93	0.000433	0.00623
dynactin complex (GO:0005869)	16	5	0.33	+	15.07	5.25e-05	0.000849
striated muscle thin filament (GO:0005865)	23	5	0.48	+	10.49	0.000226	0.00335
costamere (GO:0043034)	18	5	0.37	+	13.4	8.4e-05	0.00132
endoplasmic reticulum chaperone complex (GO:0034663)	10	5	0.21	+	24.12	8.57e-06	0.000153
filamentous actin (GO:0031941)	31	5	0.64	+	7.78	0.000758	0.0105
magnesium-dependent protein serine/threonine phosphatase complex (GO:0005963)	26	4	0.54	+	7.42	0.00303	0.0369
protein phosphatase type 2A complex (GO:0000159)	17	4	0.35	+	11.35	0.000764	0.0105
proteasome core complex, alpha-subunit complex (GO:0019773)	8	4	0.17	+	24.12	7.3e-05	0.00117
pseudopodium (GO:0031143)	18	4	0.37	+	10.72	0.000918	0.0125
muscle thin filament tropomyosin (GO:0005862)	4	4	0.08	+	48.23	1.1e-05	0.000195
eukaryotic translation elongation factor 1 complex (GO:0005853)	4	4	0.08	+	48.23	1.1e-05	0.000194
spectrin (GO:0008091)	9	3	0.19	+	16.08	0.0016	0.0206
cell trailing edge (GO:0031254)	13	3	0.27	+	11.13	0.00383	0.0464
uropod (GO:0001931)	13	3	0.27	+	11.13	0.00383	0.0461
Unclassified (UNCLASSIFIED)	1729	3	35.85	-	0.08	1.72e-12	5.61e-11
Arp2/3 protein complex (GO:0005885)	9	3	0.19	+	16.08	0.0016	0.0205
sperm annulus (GO:0097227)	6	3	0.12	+	24.12	0.000638	0.00893
nascent polypeptide-associated complex (GO:0005854)	5	3	0.1	+	28.94	0.000432	0.00626
phosphopyruvate hydratase complex (GO:0000015)	4	3	0.08	+	36.17	0.000274	0.00403
myosin II filament (GO:0097513)	3	3	0.06	+	48.23	0.000159	0.00243
intrinsic component of plasma membrane (GO:0031226)	1738	2	36.03	-	0.06	1.06e-13	4.21e-12
Golgi membrane (GO:0000139)	626	2	12.98	-	0.15	0.000442	0.00633
integral component of plasma membrane (GO:0005887)	1653	2	34.27	-	0.06	5.43e-13	1.92e-11
proton-transporting ATP synthase, catalytic core (GO:0045267)	2	2	0.04	+	48.23	0.0024	0.0302
mitochondrial proton-transporting ATP synthase, catalytic core (GO:0005754)	2	2	0.04	+	48.23	0.0024	0.03
Schwann cell microvillus (GO:0097454)	3	2	0.06	+	32.15	0.00395	0.0473

## Sheet: Biological Process 1535
Analysis Type:	PANTHER Overrepresentation Test (Released 20210224)
Annotation Version and Release Date:	GO Ontology database DOI: 10.5281/zenodo.5228828 Released 2021-08-18
Analyzed List:	upload_1 (Homo sapiens)
Reference List:	Homo sapiens (all genes in database)
Test Type:	FISHER
Correction:	FDR
GO biological process complete	Homo sapiens - REFLIST (20595)	upload_1 (427)	upload_1 (expected)	upload_1 (over/under)	upload_1 (fold Enrichment)	upload_1 (raw P-value)	upload_1 (FDR)
organelle organization (GO:0006996)	3360	173	69.66	+	2.48	7.56e-32	1.19e-27
protein folding (GO:0006457)	209	47	4.33	+	10.85	3.41e-31	2.68e-27
cellular process (GO:0009987)	15074	403	312.53	+	1.29	3.41e-29	1.79e-25
cytoskeleton organization (GO:0007010)	1169	87	24.24	+	3.59	1.92e-24	7.54e-21
cellular component organization or biogenesis (GO:0071840)	5496	210	113.95	+	1.84	1.44e-22	4.53e-19
cellular component organization (GO:0016043)	5298	205	109.84	+	1.87	2.22e-22	5.83e-19
biological_process (GO:0008150)	17698	422	366.94	+	1.15	3.2e-21	6.28e-18
Unclassified (UNCLASSIFIED)	2897	5	60.06	-	0.08	3.2e-21	7.18e-18
nucleosome assembly (GO:0006334)	101	28	2.09	+	13.37	4.54e-21	7.93e-18
nucleosome organization (GO:0034728)	140	30	2.9	+	10.34	9.37e-20	1.47e-16
chromatin assembly (GO:0031497)	134	29	2.78	+	10.44	3.08e-19	4.4e-16
nucleoside diphosphate phosphorylation (GO:0006165)	59	22	1.22	+	17.98	4.26e-19	5.58e-16
nucleotide phosphorylation (GO:0046939)	61	22	1.26	+	17.4	7.63e-19	9.23e-16
chromatin assembly or disassembly (GO:0006333)	154	30	3.19	+	9.4	9.66e-19	1.09e-15
glycolytic process (GO:0006096)	40	19	0.83	+	22.91	3.13e-18	3.28e-15
ATP generation from ADP (GO:0006757)	41	19	0.85	+	22.35	4.5e-18	4.42e-15
pyruvate metabolic process (GO:0006090)	61	21	1.26	+	16.6	1.05e-17	9.14e-15
actin cytoskeleton organization (GO:0030036)	539	50	11.18	+	4.47	1.01e-17	9.3e-15
actin filament-based process (GO:0030029)	599	52	12.42	+	4.19	2.85e-17	2.36e-14
protein-DNA complex assembly (GO:0065004)	167	29	3.46	+	8.38	5.61e-17	4.41e-14
ADP metabolic process (GO:0046031)	49	19	1.02	+	18.7	6.36e-17	4.76e-14
nucleoside diphosphate metabolic process (GO:0009132)	84	22	1.74	+	12.63	2.21e-16	1.51e-13
protein-DNA complex subunit organization (GO:0071824)	208	31	4.31	+	7.19	2.12e-16	1.52e-13
DNA packaging (GO:0006323)	180	29	3.73	+	7.77	3.27e-16	2.14e-13
chromosome organization (GO:0051276)	1021	66	21.17	+	3.12	1.19e-15	7.48e-13
chromatin organization (GO:0006325)	686	53	14.22	+	3.73	1.32e-15	7.96e-13
protein-containing complex subunit organization (GO:0043933)	1337	77	27.72	+	2.78	1.38e-15	8.04e-13
purine nucleoside diphosphate metabolic process (GO:0009135)	62	19	1.29	+	14.78	2.25e-15	1.22e-12
purine ribonucleoside diphosphate metabolic process (GO:0009179)	62	19	1.29	+	14.78	2.25e-15	1.27e-12
chromatin remodeling (GO:0006338)	247	32	5.12	+	6.25	2.48e-15	1.3e-12
cellular component biogenesis (GO:0044085)	2481	112	51.44	+	2.18	3.77e-15	1.91e-12
ribonucleoside diphosphate metabolic process (GO:0009185)	65	19	1.35	+	14.1	4.65e-15	2.28e-12
cellular component assembly (GO:0022607)	2251	104	46.67	+	2.23	1.09e-14	5.21e-12
DNA conformation change (GO:0071103)	269	32	5.58	+	5.74	2.16e-14	9.96e-12
chaperone-mediated protein folding (GO:0061077)	67	18	1.39	+	12.96	8.41e-14	3.78e-11
'de novo' protein folding (GO:0006458)	43	15	0.89	+	16.83	4.34e-13	1.9e-10
protein-containing complex assembly (GO:0065003)	1185	66	24.57	+	2.69	8.76e-13	3.72e-10
ATP metabolic process (GO:0046034)	202	26	4.19	+	6.21	1.25e-12	5.17e-10
negative regulation of gene expression, epigenetic (GO:0045814)	61	16	1.26	+	12.65	2.8e-12	1.13e-09
chromatin silencing (GO:0006342)	51	15	1.06	+	14.19	3.38e-12	1.33e-09
regulation of gene expression, epigenetic (GO:0040029)	130	21	2.7	+	7.79	4.12e-12	1.58e-09
carbohydrate catabolic process (GO:0016052)	104	19	2.16	+	8.81	6.6e-12	2.47e-09
protein refolding (GO:0042026)	19	11	0.39	+	27.92	8.25e-12	3.02e-09
regulation of cellular component organization (GO:0051128)	2359	99	48.91	+	2.02	1.53e-11	5.48e-09
'de novo' posttranslational protein folding (GO:0051084)	39	13	0.81	+	16.08	2.59e-11	9.03e-09
cellular nitrogen compound metabolic process (GO:0034641)	3193	121	66.2	+	1.83	2.73e-11	9.32e-09
translation (GO:0006412)	366	32	7.59	+	4.22	4.16e-11	1.39e-08
cellular protein-containing complex assembly (GO:0034622)	780	48	16.17	+	2.97	6.78e-11	2.22e-08
chaperone cofactor-dependent protein refolding (GO:0051085)	34	12	0.7	+	17.02	8.82e-11	2.77e-08
microtubule cytoskeleton organization (GO:0000226)	521	38	10.8	+	3.52	8.66e-11	2.78e-08
protein stabilization (GO:0050821)	196	23	4.06	+	5.66	1.36e-10	4.2e-08
translational elongation (GO:0006414)	46	13	0.95	+	13.63	1.45e-10	4.38e-08
peptide biosynthetic process (GO:0043043)	388	32	8.04	+	3.98	1.66e-10	4.91e-08
substantia nigra development (GO:0021762)	47	13	0.97	+	13.34	1.82e-10	5.28e-08
positive regulation of telomere maintenance via telomere lengthening (GO:1904358)	37	12	0.77	+	15.64	1.98e-10	5.65e-08
chromatin organization involved in negative regulation of transcription (GO:0097549)	72	15	1.49	+	10.05	2.24e-10	6.3e-08
gene silencing (GO:0016458)	148	20	3.07	+	6.52	2.37e-10	6.53e-08
chromatin organization involved in regulation of transcription (GO:0034401)	86	16	1.78	+	8.97	2.44e-10	6.61e-08
regulation of RNA splicing (GO:0043484)	150	20	3.11	+	6.43	2.93e-10	7.81e-08
microtubule-based process (GO:0007017)	765	46	15.86	+	2.9	3.56e-10	9.32e-08
positive regulation of telomere maintenance (GO:0032206)	51	13	1.06	+	12.29	4.29e-10	1.1e-07
nucleobase-containing compound metabolic process (GO:0006139)	2474	98	51.29	+	1.91	5.12e-10	1.3e-07
regulation of cellular protein localization (GO:1903827)	538	37	11.15	+	3.32	7.17e-10	1.79e-07
positive regulation of DNA biosynthetic process (GO:2000573)	67	14	1.39	+	10.08	8.7e-10	2.1e-07
regulation of DNA biosynthetic process (GO:2000278)	110	17	2.28	+	7.45	8.58e-10	2.11e-07
RNA splicing, via transesterification reactions (GO:0000375)	238	24	4.93	+	4.86	9.03e-10	2.15e-07
cellular response to heat (GO:0034605)	55	13	1.14	+	11.4	9.51e-10	2.23e-07
positive regulation of establishment of protein localization to telomere (GO:1904851)	10	8	0.21	+	38.59	9.94e-10	2.3e-07
regulation of protein localization (GO:0032880)	853	48	17.69	+	2.71	1.15e-09	2.61e-07
positive regulation of telomere maintenance via telomerase (GO:0032212)	34	11	0.7	+	15.6	1.17e-09	2.62e-07
purine ribonucleotide metabolic process (GO:0009150)	306	27	6.34	+	4.26	1.2e-09	2.66e-07
regulation of protein localization to Cajal body (GO:1904869)	11	8	0.23	+	35.08	1.69e-09	3.58e-07
positive regulation of protein localization to Cajal body (GO:1904871)	11	8	0.23	+	35.08	1.69e-09	3.63e-07
regulation of establishment of protein localization to telomere (GO:0070203)	11	8	0.23	+	35.08	1.69e-09	3.68e-07
ribose phosphate metabolic process (GO:0019693)	335	28	6.95	+	4.03	1.81e-09	3.74e-07
regulation of DNA metabolic process (GO:0051052)	358	29	7.42	+	3.91	1.79e-09	3.76e-07
response to organic substance (GO:0010033)	2688	102	55.73	+	1.83	2.09e-09	4.26e-07
regulation of macromolecule metabolic process (GO:0060255)	6083	185	126.12	+	1.47	2.36e-09	4.75e-07
supramolecular fiber organization (GO:0097435)	512	35	10.62	+	3.3	2.45e-09	4.87e-07
purine-containing compound metabolic process (GO:0072521)	342	28	7.09	+	3.95	2.77e-09	5.37e-07
nucleotide metabolic process (GO:0009117)	414	31	8.58	+	3.61	2.83e-09	5.42e-07
regulation of establishment of protein localization to chromosome (GO:0070202)	12	8	0.25	+	32.15	2.76e-09	5.43e-07
regulation of cellular localization (GO:0060341)	820	46	17	+	2.71	2.87e-09	5.44e-07
purine nucleotide metabolic process (GO:0006163)	320	27	6.63	+	4.07	2.94e-09	5.5e-07
generation of precursor metabolites and energy (GO:0006091)	391	30	8.11	+	3.7	3.04e-09	5.62e-07
RNA splicing, via transesterification reactions with bulged adenosine as nucleophile (GO:0000377)	234	23	4.85	+	4.74	3.19e-09	5.76e-07
mRNA splicing, via spliceosome (GO:0000398)	234	23	4.85	+	4.74	3.19e-09	5.83e-07
regulation of telomere maintenance via telomere lengthening (GO:1904356)	62	13	1.29	+	10.11	3.38e-09	6.03e-07
cellular aromatic compound metabolic process (GO:0006725)	2688	101	55.73	+	1.81	3.58e-09	6.32e-07
ribonucleotide metabolic process (GO:0009259)	324	27	6.72	+	4.02	3.77e-09	6.58e-07
positive regulation of protein localization to chromosome, telomeric region (GO:1904816)	13	8	0.27	+	29.68	4.38e-09	7.57e-07
nucleoside phosphate metabolic process (GO:0006753)	423	31	8.77	+	3.53	4.55e-09	7.77e-07
peptidyl-proline modification (GO:0018208)	64	13	1.33	+	9.8	4.72e-09	7.98e-07
regulation of protein stability (GO:0031647)	306	26	6.34	+	4.1	5.08e-09	8.49e-07
positive regulation of organelle organization (GO:0010638)	583	37	12.09	+	3.06	5.51e-09	9.12e-07
cell cycle (GO:0007049)	1205	58	24.98	+	2.32	5.93e-09	9.71e-07
negative regulation of cellular process (GO:0048523)	4785	153	99.21	+	1.54	6.33e-09	1.02e-06
RNA splicing (GO:0008380)	356	28	7.38	+	3.79	6.27e-09	1.02e-06
positive regulation of DNA metabolic process (GO:0051054)	203	21	4.21	+	4.99	6.83e-09	1.08e-06
response to heat (GO:0009408)	96	15	1.99	+	7.54	7.44e-09	1.17e-06
regulation of telomere maintenance (GO:0032204)	81	14	1.68	+	8.34	7.53e-09	1.17e-06
regulation of supramolecular fiber organization (GO:1902903)	384	29	7.96	+	3.64	7.8e-09	1.18e-06
regulation of telomere maintenance via telomerase (GO:0032210)	54	12	1.12	+	10.72	7.73e-09	1.18e-06
neural nucleus development (GO:0048857)	67	13	1.39	+	9.36	7.66e-09	1.18e-06
regulation of biological quality (GO:0065008)	3705	126	76.82	+	1.64	9.04e-09	1.35e-06
heterocycle metabolic process (GO:0046483)	2625	98	54.42	+	1.8	9.4e-09	1.39e-06
regulation of protein localization to chromosome, telomeric region (GO:1904814)	15	8	0.31	+	25.72	1.02e-08	1.48e-06
positive regulation of telomerase RNA localization to Cajal body (GO:1904874)	15	8	0.31	+	25.72	1.02e-08	1.5e-06
peptide metabolic process (GO:0006518)	519	34	10.76	+	3.16	1.13e-08	1.63e-06
negative regulation of gene expression (GO:0010629)	879	47	18.22	+	2.58	1.16e-08	1.66e-06
amide biosynthetic process (GO:0043604)	500	33	10.37	+	3.18	1.58e-08	2.24e-06
regulation of apoptotic process (GO:0042981)	1426	64	29.57	+	2.16	1.6e-08	2.25e-06
organic cyclic compound metabolic process (GO:1901360)	2922	105	60.58	+	1.73	1.81e-08	2.51e-06
cytoplasmic translation (GO:0002181)	122	16	2.53	+	6.33	2.21e-08	3.05e-06
positive regulation of cellular component organization (GO:0051130)	1119	54	23.2	+	2.33	2.26e-08	3.08e-06
regulation of programmed cell death (GO:0043067)	1456	64	30.19	+	2.12	2.41e-08	3.27e-06
protein peptidyl-prolyl isomerization (GO:0000413)	48	11	1	+	11.05	2.49e-08	3.31e-06
positive regulation of protein localization to nucleus (GO:1900182)	90	14	1.87	+	7.5	2.48e-08	3.34e-06
regulation of protein localization to nucleus (GO:1900180)	142	17	2.94	+	5.77	2.73e-08	3.61e-06
regulation of cell death (GO:0010941)	1593	68	33.03	+	2.06	2.96e-08	3.88e-06
regulation of telomerase RNA localization to Cajal body (GO:1904872)	18	8	0.37	+	21.44	3.08e-08	3.93e-06
actomyosin structure organization (GO:0031032)	108	15	2.24	+	6.7	3.07e-08	3.96e-06
negative regulation of biological process (GO:0048519)	5187	160	107.54	+	1.49	3.06e-08	3.97e-06
regulation of nitrogen compound metabolic process (GO:0051171)	5537	168	114.8	+	1.46	3.2e-08	4.06e-06
mitotic cell cycle (GO:0000278)	599	36	12.42	+	2.9	3.32e-08	4.18e-06
binding of sperm to zona pellucida (GO:0007339)	38	10	0.79	+	12.69	3.53e-08	4.41e-06
nucleobase-containing small molecule metabolic process (GO:0055086)	493	32	10.22	+	3.13	3.8e-08	4.7e-06
actin filament organization (GO:0007015)	271	23	5.62	+	4.09	4.03e-08	4.94e-06
protein localization (GO:0008104)	1901	76	39.41	+	1.93	5.26e-08	6.41e-06
cellular metabolic process (GO:0044237)	7029	201	145.73	+	1.38	5.48e-08	6.63e-06
cellular response to chemical stimulus (GO:0070887)	2567	94	53.22	+	1.77	5.73e-08	6.87e-06
regulation of primary metabolic process (GO:0080090)	5707	171	118.32	+	1.45	5.78e-08	6.88e-06
regulation of organelle organization (GO:0033043)	1189	55	24.65	+	2.23	6.06e-08	7.17e-06
non-membrane-bounded organelle assembly (GO:0140694)	303	24	6.28	+	3.82	6.85e-08	8.03e-06
positive regulation of cellular protein localization (GO:1903829)	282	23	5.85	+	3.93	7.89e-08	9.18e-06
toxin transport (GO:1901998)	42	10	0.87	+	11.48	7.95e-08	9.19e-06
negative regulation of macromolecule metabolic process (GO:0010605)	2737	98	56.75	+	1.73	8.61e-08	9.88e-06
regulation of protein-containing complex assembly (GO:0043254)	433	29	8.98	+	3.23	9.02e-08	1.03e-05
regulation of establishment of protein localization (GO:0070201)	541	33	11.22	+	2.94	9.17e-08	1.04e-05
negative regulation of protein-containing complex assembly (GO:0031333)	137	16	2.84	+	5.63	9.57e-08	1.07e-05
platelet aggregation (GO:0070527)	44	10	0.91	+	10.96	1.16e-07	1.28e-05
negative regulation of nitrogen compound metabolic process (GO:0051172)	2380	88	49.34	+	1.78	1.16e-07	1.29e-05
midbrain development (GO:0030901)	89	13	1.85	+	7.05	1.52e-07	1.66e-05
organic substance biosynthetic process (GO:1901576)	2354	87	48.81	+	1.78	1.52e-07	1.67e-05
gene expression (GO:0010467)	1992	77	41.3	+	1.86	1.61e-07	1.75e-05
sperm-egg recognition (GO:0035036)	46	10	0.95	+	10.49	1.66e-07	1.79e-05
response to interleukin-7 (GO:0098760)	15	7	0.31	+	22.51	1.78e-07	1.89e-05
cellular response to interleukin-7 (GO:0098761)	15	7	0.31	+	22.51	1.78e-07	1.9e-05
positive regulation of establishment of protein localization (GO:1904951)	326	24	6.76	+	3.55	2.42e-07	2.55e-05
regulation of metabolic process (GO:0019222)	6586	188	136.55	+	1.38	2.62e-07	2.74e-05
macromolecule localization (GO:0033036)	2308	85	47.85	+	1.78	2.74e-07	2.86e-05
response to organic cyclic compound (GO:0014070)	896	44	18.58	+	2.37	3.04e-07	3.15e-05
carboxylic acid metabolic process (GO:0019752)	808	41	16.75	+	2.45	3.09e-07	3.17e-05
cell-cell recognition (GO:0009988)	64	11	1.33	+	8.29	3.25e-07	3.32e-05
monocarboxylic acid metabolic process (GO:0032787)	491	30	10.18	+	2.95	3.47e-07	3.47e-05
cellular nitrogen compound biosynthetic process (GO:0044271)	1289	56	26.73	+	2.1	3.46e-07	3.49e-05
positive regulation of gene expression (GO:0010628)	1128	51	23.39	+	2.18	3.44e-07	3.49e-05
positive regulation of chromosome organization (GO:2001252)	175	17	3.63	+	4.69	4.28e-07	4.25e-05
cytokinesis (GO:0000910)	99	13	2.05	+	6.33	4.59e-07	4.54e-05
biosynthetic process (GO:0009058)	2420	87	50.17	+	1.73	4.88e-07	4.8e-05
cellular localization (GO:0051641)	2264	83	46.94	+	1.77	5.02e-07	4.9e-05
organic substance metabolic process (GO:0071704)	7404	205	153.51	+	1.34	5.45e-07	5.29e-05
regulation of intracellular transport (GO:0032386)	343	24	7.11	+	3.37	5.71e-07	5.5e-05
cellular response to stress (GO:0033554)	1519	62	31.49	+	1.97	5.96e-07	5.67e-05
primary metabolic process (GO:0044238)	6869	193	142.42	+	1.36	5.92e-07	5.68e-05
regulation of cellular component biogenesis (GO:0044087)	950	45	19.7	+	2.28	6.77e-07	6.41e-05
regulation of mRNA splicing, via spliceosome (GO:0048024)	103	13	2.14	+	6.09	6.91e-07	6.5e-05
negative regulation of metabolic process (GO:0009892)	2952	100	61.2	+	1.63	7.06e-07	6.61e-05
oxoacid metabolic process (GO:0043436)	832	41	17.25	+	2.38	8.22e-07	7.65e-05
cellular response to organic substance (GO:0071310)	1980	74	41.05	+	1.8	9.49e-07	8.78e-05
regulation of protein-containing complex disassembly (GO:0043244)	125	14	2.59	+	5.4	9.6e-07	8.82e-05
homotypic cell-cell adhesion (GO:0034109)	59	10	1.22	+	8.17	1.26e-06	0.000115
organic acid metabolic process (GO:0006082)	854	41	17.71	+	2.32	1.27e-06	0.000116
response to inorganic substance (GO:0010035)	554	31	11.49	+	2.7	1.3e-06	0.000118
carbohydrate metabolic process (GO:0005975)	469	28	9.72	+	2.88	1.32e-06	0.000119
negative regulation of protein polymerization (GO:0032272)	75	11	1.55	+	7.07	1.33e-06	0.000119
response to chemical (GO:0042221)	4055	126	84.07	+	1.5	1.56e-06	0.000139
muscle cell development (GO:0055001)	151	15	3.13	+	4.79	1.58e-06	0.00014
regulation of cytoskeleton organization (GO:0051493)	531	30	11.01	+	2.72	1.61e-06	0.000141
metabolic process (GO:0008152)	7882	213	163.42	+	1.3	1.64e-06	0.000144
muscle structure development (GO:0061061)	477	28	9.89	+	2.83	1.8e-06	0.000156
regulation of binding (GO:0051098)	368	24	7.63	+	3.15	1.83e-06	0.000158
regulation of mRNA metabolic process (GO:1903311)	291	21	6.03	+	3.48	1.85e-06	0.000159
negative regulation of cellular metabolic process (GO:0031324)	2546	88	52.79	+	1.67	1.92e-06	0.000164
biological regulation (GO:0065007)	12249	302	253.96	+	1.19	2.01e-06	0.000171
cytoskeleton-dependent cytokinesis (GO:0061640)	97	12	2.01	+	5.97	2.24e-06	0.000189
regulation of cellular metabolic process (GO:0031323)	5928	169	122.91	+	1.38	2.49e-06	0.000209
positive regulation of binding (GO:0051099)	179	16	3.71	+	4.31	2.55e-06	0.000213
positive regulation of macromolecule metabolic process (GO:0010604)	3382	109	70.12	+	1.55	2.63e-06	0.000219
cellular amide metabolic process (GO:0043603)	780	38	16.17	+	2.35	2.73e-06	0.000226
regulation of telomerase activity (GO:0051972)	50	9	1.04	+	8.68	2.77e-06	0.000228
negative regulation of supramolecular fiber organization (GO:1902904)	159	15	3.3	+	4.55	2.85e-06	0.000233
monosaccharide biosynthetic process (GO:0046364)	37	8	0.77	+	10.43	3.03e-06	0.000247
response to unfolded protein (GO:0006986)	120	13	2.49	+	5.23	3.28e-06	0.000266
hexose metabolic process (GO:0019318)	144	14	2.99	+	4.69	4.43e-06	0.000357
regulation of localization (GO:0032879)	2709	91	56.17	+	1.62	4.88e-06	0.000391
regulation of protein polymerization (GO:0032271)	237	18	4.91	+	3.66	5.21e-06	0.000411
nitrogen compound metabolic process (GO:0006807)	6360	177	131.86	+	1.34	5.16e-06	0.000411
RNA localization (GO:0006403)	190	16	3.94	+	4.06	5.19e-06	0.000412
response to temperature stimulus (GO:0009266)	168	15	3.48	+	4.31	5.31e-06	0.000417
cellular macromolecule biosynthetic process (GO:0034645)	1368	55	28.36	+	1.94	5.49e-06	0.000429
cellular protein localization (GO:0034613)	1376	55	28.53	+	1.93	5.81e-06	0.000452
cellular macromolecule localization (GO:0070727)	1386	55	28.74	+	1.91	6.38e-06	0.000494
macromolecule biosynthetic process (GO:0009059)	1391	55	28.84	+	1.91	6.76e-06	0.00052
regulation of protein depolymerization (GO:1901879)	91	11	1.89	+	5.83	7.25e-06	0.000556
positive regulation of metabolic process (GO:0009893)	3675	114	76.19	+	1.5	7.56e-06	0.000577
establishment of localization in cell (GO:0051649)	1618	61	33.55	+	1.82	8.16e-06	0.000614
myofibril assembly (GO:0030239)	58	9	1.2	+	7.48	8.16e-06	0.000616
negative regulation of cellular component organization (GO:0051129)	722	35	14.97	+	2.34	8.15e-06	0.000619
cellular biosynthetic process (GO:0044249)	2293	79	47.54	+	1.66	9.01e-06	0.000674
striated muscle cell development (GO:0055002)	59	9	1.22	+	7.36	9.24e-06	0.000688
regulation of protein metabolic process (GO:0051246)	2492	84	51.67	+	1.63	9.47e-06	0.000702
regulation of cell shape (GO:0008360)	155	14	3.21	+	4.36	9.65e-06	0.000712
mRNA processing (GO:0006397)	437	25	9.06	+	2.76	9.83e-06	0.000722
cellular response to unfolded protein (GO:0034620)	77	10	1.6	+	6.26	1.07e-05	0.000781
regulation of molecular function (GO:0065009)	3060	98	63.44	+	1.54	1.09e-05	0.000792
organophosphate metabolic process (GO:0019637)	833	38	17.27	+	2.2	1.1e-05	0.0008
response to stress (GO:0006950)	3336	105	69.17	+	1.52	1.15e-05	0.000826
regulation of actin filament organization (GO:0110053)	278	19	5.76	+	3.3	1.18e-05	0.000845
posttranscriptional regulation of gene expression (GO:0010608)	504	27	10.45	+	2.58	1.34e-05	0.000956
RNA processing (GO:0006396)	847	38	17.56	+	2.16	1.43e-05	0.00101
regulation of mRNA processing (GO:0050684)	139	13	2.88	+	4.51	1.42e-05	0.00101
hexose biosynthetic process (GO:0019319)	33	7	0.68	+	10.23	1.42e-05	0.00101
nervous system process (GO:0050877)	1418	9	29.4	-	0.31	1.5e-05	0.00105
regulation of cell morphogenesis (GO:0022604)	310	20	6.43	+	3.11	1.54e-05	0.00107
positive regulation of telomerase activity (GO:0051973)	34	7	0.7	+	9.93	1.68e-05	0.00117
positive regulation of biological process (GO:0048518)	6062	168	125.68	+	1.34	1.71e-05	0.00118
positive regulation of cellular process (GO:0048522)	5580	157	115.69	+	1.36	1.72e-05	0.00119
response to topologically incorrect protein (GO:0035966)	142	13	2.94	+	4.42	1.75e-05	0.0012
mRNA metabolic process (GO:0016071)	564	29	11.69	+	2.48	1.77e-05	0.00121
glucose metabolic process (GO:0006006)	101	11	2.09	+	5.25	1.78e-05	0.00121
monosaccharide metabolic process (GO:0005996)	165	14	3.42	+	4.09	1.86e-05	0.00126
mesenchyme migration (GO:0090131)	5	4	0.1	+	38.59	1.95e-05	0.00132
protein depolymerization (GO:0051261)	36	7	0.75	+	9.38	2.33e-05	0.00156
organonitrogen compound biosynthetic process (GO:1901566)	1250	49	25.92	+	1.89	2.65e-05	0.00177
negative regulation of apoptotic process (GO:0043066)	870	38	18.04	+	2.11	2.99e-05	0.00199
regulation of cellular catabolic process (GO:0031329)	813	36	16.86	+	2.14	3.13e-05	0.00207
sensory perception of chemical stimulus (GO:0007606)	542	0	11.24	-	< 0.01	3.2e-05	0.00211
regulation of biological process (GO:0050789)	11528	282	239.01	+	1.18	3.3e-05	0.00217
negative regulation of cell death (GO:0060548)	982	41	20.36	+	2.01	3.36e-05	0.0022
G protein-coupled receptor signaling pathway (GO:0007186)	1216	7	25.21	-	0.28	3.57e-05	0.00233
regulation of gene expression (GO:0010468)	4749	136	98.46	+	1.38	3.75e-05	0.00243
cell-cell signaling (GO:0007267)	1030	5	21.36	-	0.23	3.75e-05	0.00244
nucleic acid metabolic process (GO:0090304)	2007	69	41.61	+	1.66	3.79e-05	0.00244
regulation of cellular component size (GO:0032535)	389	22	8.07	+	2.73	3.94e-05	0.00252
negative regulation of programmed cell death (GO:0043069)	888	38	18.41	+	2.06	3.94e-05	0.00252
response to abiotic stimulus (GO:0009628)	1125	45	23.32	+	1.93	4e-05	0.00254
negative regulation of cytoskeleton organization (GO:0051494)	156	13	3.23	+	4.02	4.37e-05	0.00277
response to steroid hormone (GO:0048545)	281	18	5.83	+	3.09	4.44e-05	0.00279
regulation of actin filament depolymerization (GO:0030834)	56	8	1.16	+	6.89	4.44e-05	0.0028
establishment of protein localization (GO:0045184)	1273	49	26.39	+	1.86	4.59e-05	0.00288
regulation of cellular protein catabolic process (GO:1903362)	256	17	5.31	+	3.2	4.73e-05	0.00294
negative regulation of mRNA metabolic process (GO:1903312)	93	10	1.93	+	5.19	4.72e-05	0.00294
response to oxygen-containing compound (GO:1901700)	1567	57	32.49	+	1.75	4.81e-05	0.00298
positive regulation of intracellular transport (GO:0032388)	206	15	4.27	+	3.51	4.96e-05	0.00306
cellular developmental process (GO:0048869)	3463	105	71.8	+	1.46	5.05e-05	0.0031
platelet activation (GO:0030168)	94	10	1.95	+	5.13	5.13e-05	0.00314
regulation of protein catabolic process (GO:0042176)	398	22	8.25	+	2.67	5.44e-05	0.0033
regulation of actin filament-based process (GO:0032970)	398	22	8.25	+	2.67	5.44e-05	0.00331
regulation of chromosome organization (GO:0033044)	286	18	5.93	+	3.04	5.5e-05	0.00333
intracellular transport (GO:0046907)	1247	48	25.85	+	1.86	5.91e-05	0.00356
regulation of intracellular protein transport (GO:0033157)	235	16	4.87	+	3.28	5.96e-05	0.00358
detection of chemical stimulus involved in sensory perception (GO:0050907)	488	0	10.12	-	< 0.01	6.44e-05	0.00385
positive regulation of cellular metabolic process (GO:0031325)	3186	98	66.06	+	1.48	6.5e-05	0.00385
cell development (GO:0048468)	1623	58	33.65	+	1.72	6.47e-05	0.00385
cellular response to topologically incorrect protein (GO:0035967)	97	10	2.01	+	4.97	6.54e-05	0.00387
protein-containing complex disassembly (GO:0032984)	119	11	2.47	+	4.46	7.12e-05	0.00419
purine ribonucleoside triphosphate metabolic process (GO:0009205)	61	8	1.26	+	6.33	7.68e-05	0.0045
gluconeogenesis (GO:0006094)	30	6	0.62	+	9.65	7.88e-05	0.0046
retina homeostasis (GO:0001895)	80	9	1.66	+	5.43	8.19e-05	0.00477
localization (GO:0051179)	5081	142	105.35	+	1.35	8.94e-05	0.00518
single fertilization (GO:0007338)	145	12	3.01	+	3.99	9.08e-05	0.00525
regulation of protein export from nucleus (GO:0046825)	31	6	0.64	+	9.34	9.24e-05	0.00532
purine ribonucleoside triphosphate biosynthetic process (GO:0009206)	46	7	0.95	+	7.34	9.35e-05	0.00536
sensory perception of smell (GO:0007608)	468	0	9.7	-	< 0.01	9.57e-05	0.00547
negative regulation of molecular function (GO:0044092)	1132	44	23.47	+	1.87	0.000104	0.00587
detection of stimulus (GO:0051606)	694	2	14.39	-	0.14	0.000103	0.00588
sensory perception (GO:0007600)	978	5	20.28	-	0.25	0.000105	0.00589
regulation of early endosome to late endosome transport (GO:2000641)	19	5	0.39	+	12.69	0.000104	0.0059
purine nucleoside triphosphate biosynthetic process (GO:0009145)	47	7	0.97	+	7.18	0.000106	0.00593
regulation of actin cytoskeleton organization (GO:0032956)	359	20	7.44	+	2.69	0.000107	0.00596
regulation of catabolic process (GO:0009894)	956	39	19.82	+	1.97	0.000112	0.00625
organic substance catabolic process (GO:1901575)	1587	56	32.9	+	1.7	0.00012	0.00665
muscle cell differentiation (GO:0042692)	252	16	5.22	+	3.06	0.000128	0.00711
positive regulation of nitrogen compound metabolic process (GO:0051173)	2992	92	62.03	+	1.48	0.000133	0.00734
cellular response to organic cyclic compound (GO:0071407)	515	25	10.68	+	2.34	0.000139	0.00761
purine nucleoside triphosphate metabolic process (GO:0009144)	67	8	1.39	+	5.76	0.000139	0.00763
regulation of protein transport (GO:0051223)	516	25	10.7	+	2.34	0.000142	0.00774
ribonucleoside triphosphate metabolic process (GO:0009199)	68	8	1.41	+	5.67	0.000153	0.00827
regulation of cellular protein metabolic process (GO:0032268)	2328	75	48.27	+	1.55	0.000152	0.00827
cellular component morphogenesis (GO:0032989)	569	27	11.8	+	2.29	0.000153	0.00829
spindle organization (GO:0007051)	154	12	3.19	+	3.76	0.000154	0.0083
response to hormone (GO:0009725)	772	33	16.01	+	2.06	0.000164	0.00879
cellular protein complex disassembly (GO:0043624)	51	7	1.06	+	6.62	0.000167	0.00891
positive regulation of protein-containing complex disassembly (GO:0043243)	35	6	0.73	+	8.27	0.000167	0.00893
regulation of nucleocytoplasmic transport (GO:0046822)	110	10	2.28	+	4.38	0.000171	0.00909
fertilization (GO:0009566)	181	13	3.75	+	3.46	0.000177	0.00937
developmental process (GO:0032502)	5565	151	115.38	+	1.31	0.000181	0.00955
negative regulation of protein depolymerization (GO:1901880)	70	8	1.45	+	5.51	0.000184	0.00966
ribonucleoside triphosphate biosynthetic process (GO:0009201)	52	7	1.08	+	6.49	0.000186	0.00976
negative regulation of mRNA splicing, via spliceosome (GO:0048025)	22	5	0.46	+	10.96	0.000189	0.00978
alternative mRNA splicing, via spliceosome (GO:0000380)	22	5	0.46	+	10.96	0.000189	0.00981
regulation of nuclease activity (GO:0032069)	22	5	0.46	+	10.96	0.000189	0.00984
catabolic process (GO:0009056)	1882	63	39.02	+	1.61	0.000191	0.00988
protein folding in endoplasmic reticulum (GO:0034975)	11	4	0.23	+	17.54	0.000192	0.00988
negative regulation of nucleobase-containing compound metabolic process (GO:0045934)	1538	54	31.89	+	1.69	0.000196	0.0101
detection of stimulus involved in sensory perception (GO:0050906)	558	1	11.57	-	0.09	0.0002	0.0102
negative regulation of protein metabolic process (GO:0051248)	1028	40	21.31	+	1.88	0.0002	0.0102
regulation of apoptotic signaling pathway (GO:2001233)	348	19	7.22	+	2.63	0.000201	0.0102
small molecule metabolic process (GO:0044281)	1547	54	32.07	+	1.68	0.000211	0.0107
negative regulation of biosynthetic process (GO:0009890)	1649	57	34.19	+	1.67	0.000213	0.0108
regulation of intrinsic apoptotic signaling pathway (GO:2001242)	160	12	3.32	+	3.62	0.000215	0.0108
actin filament capping (GO:0051693)	37	6	0.77	+	7.82	0.000219	0.011
sarcomere organization (GO:0045214)	37	6	0.77	+	7.82	0.000219	0.011
detection of chemical stimulus involved in sensory perception of smell (GO:0050911)	443	0	9.18	-	< 0.01	0.00022	0.011
innate immune response in mucosa (GO:0002227)	23	5	0.48	+	10.49	0.000226	0.0112
RNA metabolic process (GO:0016070)	1403	50	29.09	+	1.72	0.000231	0.0114
protein transport (GO:0015031)	1183	44	24.53	+	1.79	0.000235	0.0116
cytoskeleton-dependent intracellular transport (GO:0030705)	187	13	3.88	+	3.35	0.000239	0.0118
regulation of nucleobase-containing compound metabolic process (GO:0019219)	3931	113	81.5	+	1.39	0.00024	0.0118
regulation of catalytic activity (GO:0050790)	2393	76	49.61	+	1.53	0.000245	0.012
negative regulation of RNA metabolic process (GO:0051253)	1433	51	29.71	+	1.72	0.00025	0.0122
regulation of signal transduction by p53 class mediator (GO:1901796)	94	9	1.95	+	4.62	0.000252	0.0122
actin filament depolymerization (GO:0030042)	12	4	0.25	+	16.08	0.000252	0.0122
actin-myosin filament sliding (GO:0033275)	12	4	0.25	+	16.08	0.000252	0.0122
biological process involved in interspecies interaction between organisms (GO:0044419)	1519	53	31.49	+	1.68	0.000262	0.0126
cellular response to cytokine stimulus (GO:0071345)	702	30	14.55	+	2.06	0.000266	0.0128
NADH metabolic process (GO:0006734)	24	5	0.5	+	10.05	0.000268	0.0129
positive regulation of translational elongation (GO:0045901)	4	3	0.08	+	36.17	0.000274	0.013
positive regulation of translational termination (GO:0045905)	4	3	0.08	+	36.17	0.000274	0.0131
regulation of actin polymerization or depolymerization (GO:0008064)	190	13	3.94	+	3.3	0.000276	0.0131
actin filament fragmentation (GO:0030043)	4	3	0.08	+	36.17	0.000274	0.0131
regulation of actin filament length (GO:0030832)	191	13	3.96	+	3.28	0.00029	0.0137
cell differentiation (GO:0030154)	3403	100	70.56	+	1.42	0.000292	0.0138
positive regulation of cytoskeleton organization (GO:0051495)	218	14	4.52	+	3.1	0.0003	0.0141
negative regulation of macromolecule biosynthetic process (GO:0010558)	1558	54	32.3	+	1.67	0.000301	0.0141
nucleic acid transport (GO:0050657)	167	12	3.46	+	3.47	0.00031	0.0144
RNA transport (GO:0050658)	167	12	3.46	+	3.47	0.00031	0.0145
cellular component assembly involved in morphogenesis (GO:0010927)	97	9	2.01	+	4.48	0.000313	0.0145
ribonucleoprotein complex subunit organization (GO:0071826)	193	13	4	+	3.25	0.000318	0.0147
postsynaptic actin cytoskeleton organization (GO:0098974)	13	4	0.27	+	14.84	0.000324	0.0149
cellular response to aldehyde (GO:0110096)	13	4	0.27	+	14.84	0.000324	0.0149
organonitrogen compound metabolic process (GO:1901564)	4787	132	99.25	+	1.33	0.000331	0.0152
regulation of cellular process (GO:0050794)	11076	267	229.64	+	1.16	0.000334	0.0153
establishment of RNA localization (GO:0051236)	169	12	3.5	+	3.42	0.000343	0.0155
positive regulation of DNA binding (GO:0043388)	58	7	1.2	+	5.82	0.000343	0.0155
regulation of proteolysis (GO:0030162)	738	31	15.3	+	2.03	0.00034	0.0155
positive regulation of molecular function (GO:0044093)	1497	52	31.04	+	1.68	0.000341	0.0155
actin filament bundle assembly (GO:0051017)	58	7	1.2	+	5.82	0.000343	0.0155
response to endogenous stimulus (GO:0009719)	1342	48	27.82	+	1.73	0.000347	0.0156
regulation of cellular response to stress (GO:0080135)	637	28	13.21	+	2.12	0.000354	0.0159
muscle contraction (GO:0006936)	222	14	4.6	+	3.04	0.000356	0.0159
negative regulation of actin filament depolymerization (GO:0030835)	41	6	0.85	+	7.06	0.00036	0.016
cell cycle process (GO:0022402)	802	33	16.63	+	1.98	0.000362	0.0161
regulation of DNA binding (GO:0051101)	122	10	2.53	+	3.95	0.000371	0.0164
regulation of body fluid levels (GO:0050878)	367	19	7.61	+	2.5	0.000379	0.0167
regulation of macromolecule biosynthetic process (GO:0010556)	3935	112	81.59	+	1.37	0.00039	0.0172
macromolecule metabolic process (GO:0043170)	5743	153	119.07	+	1.28	0.000396	0.0174
negative regulation of microtubule polymerization (GO:0031115)	14	4	0.29	+	13.78	0.00041	0.0179
positive regulation by host of viral process (GO:0044794)	14	4	0.29	+	13.78	0.00041	0.0179
negative regulation of actin filament polymerization (GO:0030837)	60	7	1.24	+	5.63	0.000413	0.018
negative regulation of cellular macromolecule biosynthetic process (GO:2000113)	1547	53	32.07	+	1.65	0.000418	0.0182
negative regulation of protein-containing complex disassembly (GO:0043242)	80	8	1.66	+	4.82	0.000422	0.0183
negative regulation of RNA splicing (GO:0033119)	27	5	0.56	+	8.93	0.000433	0.0184
regulation of ubiquitin-specific protease activity (GO:2000152)	5	3	0.1	+	28.94	0.000432	0.0184
detection of chemical stimulus (GO:0009593)	524	1	10.86	-	0.09	0.000428	0.0185
scaRNA localization to Cajal body (GO:0090666)	5	3	0.1	+	28.94	0.000432	0.0185
RNA localization to Cajal body (GO:0090670)	5	3	0.1	+	28.94	0.000432	0.0185
RNA localization to nucleus (GO:0090685)	5	3	0.1	+	28.94	0.000432	0.0186
hemostasis (GO:0007599)	174	12	3.61	+	3.33	0.000439	0.0187
actin filament bundle organization (GO:0061572)	61	7	1.26	+	5.53	0.000453	0.0192
positive regulation of supramolecular fiber organization (GO:1902905)	201	13	4.17	+	3.12	0.000458	0.0194
regulation of cellular macromolecule biosynthetic process (GO:2000112)	3906	111	80.98	+	1.37	0.000475	0.02
anatomical structure development (GO:0048856)	5001	136	103.69	+	1.31	0.000501	0.021
postsynaptic cytoskeleton organization (GO:0099188)	15	4	0.31	+	12.86	0.000511	0.0214
positive regulation of nucleobase-containing compound metabolic process (GO:0045935)	1902	62	39.43	+	1.57	0.000525	0.0219
cellular macromolecule metabolic process (GO:0044260)	4442	123	92.1	+	1.34	0.000561	0.0234
regulation of cytoplasmic transport (GO:1903649)	29	5	0.6	+	8.32	0.000578	0.0239
regulation of oxidative stress-induced intrinsic apoptotic signaling pathway (GO:1902175)	29	5	0.6	+	8.32	0.000578	0.024
modulation by host of viral process (GO:0044788)	29	5	0.6	+	8.32	0.000578	0.024
biological process involved in symbiotic interaction (GO:0044403)	234	14	4.85	+	2.89	0.000585	0.0241
positive regulation of nucleocytoplasmic transport (GO:0046824)	64	7	1.33	+	5.28	0.00059	0.0242
nucleoside triphosphate biosynthetic process (GO:0009142)	64	7	1.33	+	5.28	0.00059	0.0243
regulation of biosynthetic process (GO:0009889)	4152	116	86.08	+	1.35	0.000639	0.0261
negative regulation of protein export from nucleus (GO:0046826)	6	3	0.12	+	24.12	0.000638	0.0261
cellular detoxification (GO:1990748)	108	9	2.24	+	4.02	0.000647	0.0263
phosphorylation (GO:0016310)	874	34	18.12	+	1.88	0.000646	0.0263
system development (GO:0048731)	4169	116	86.44	+	1.34	0.000659	0.0267
tricarboxylic acid cycle (GO:0006099)	30	5	0.62	+	8.04	0.000663	0.0268
regulation of cellular biosynthetic process (GO:0031326)	4088	114	84.76	+	1.35	0.000745	0.03
negative regulation of mRNA processing (GO:0050686)	31	5	0.64	+	7.78	0.000758	0.0305
ribonucleoprotein complex assembly (GO:0022618)	186	12	3.86	+	3.11	0.000766	0.0306
response to reactive oxygen species (GO:0000302)	186	12	3.86	+	3.11	0.000766	0.0307
negative regulation of cellular protein metabolic process (GO:0032269)	962	36	19.95	+	1.8	0.000795	0.0317
muscle system process (GO:0003012)	271	15	5.62	+	2.67	0.000807	0.0321
mRNA transport (GO:0051028)	137	10	2.84	+	3.52	0.000864	0.0341
positive regulation of translation (GO:0045727)	137	10	2.84	+	3.52	0.000864	0.0342
mucosal immune response (GO:0002385)	32	5	0.66	+	7.54	0.000862	0.0342
muscle tissue development (GO:0060537)	303	16	6.28	+	2.55	0.000881	0.0347
ribosomal small subunit export from nucleus (GO:0000056)	7	3	0.15	+	20.67	0.000898	0.0353
mRNA transcription (GO:0009299)	18	4	0.37	+	10.72	0.000918	0.036
nucleoside triphosphate metabolic process (GO:0009141)	91	8	1.89	+	4.24	0.000927	0.0363
central nervous system development (GO:0007417)	1002	37	20.77	+	1.78	0.000951	0.0371
regulation of anatomical structure size (GO:0090066)	521	23	10.8	+	2.13	0.000969	0.0377
biological process involved in interaction with symbiont (GO:0051702)	92	8	1.91	+	4.19	0.000991	0.0384
cellular response to toxic substance (GO:0097237)	116	9	2.41	+	3.74	0.00104	0.04
striated muscle cell differentiation (GO:0051146)	193	12	4	+	3	0.00104	0.0401
carbohydrate biosynthetic process (GO:0016051)	116	9	2.41	+	3.74	0.00104	0.0401
actin filament-based movement (GO:0030048)	93	8	1.93	+	4.15	0.00106	0.0406
negative regulation of cellular biosynthetic process (GO:0031327)	1616	53	33.5	+	1.58	0.00108	0.0415
positive regulation of protein transport (GO:0051222)	310	16	6.43	+	2.49	0.00111	0.0423
regulation of translation (GO:0006417)	399	19	8.27	+	2.3	0.00116	0.0442
mesenchyme development (GO:0060485)	224	13	4.64	+	2.8	0.00118	0.0449
regulation of chaperone-mediated autophagy (GO:1904714)	8	3	0.17	+	18.09	0.00122	0.0457
ribosomal small subunit biogenesis (GO:0042274)	73	7	1.51	+	4.62	0.00121	0.0458
positive regulation of nuclease activity (GO:0032075)	8	3	0.17	+	18.09	0.00122	0.0458
positive regulation by host of viral genome replication (GO:0044829)	8	3	0.17	+	18.09	0.00122	0.0459
blood coagulation (GO:0007596)	170	11	3.52	+	3.12	0.00123	0.046
positive regulation of early endosome to late endosome transport (GO:2000643)	8	3	0.17	+	18.09	0.00122	0.0461
animal organ development (GO:0048513)	3079	89	63.84	+	1.39	0.00127	0.0475
regulation of protein binding (GO:0043393)	198	12	4.11	+	2.92	0.00127	0.0475
nitrogen compound transport (GO:0071705)	1578	52	32.72	+	1.59	0.00127	0.0475
negative regulation of ubiquitin-protein transferase activity (GO:0051444)	20	4	0.41	+	9.65	0.00129	0.048
response to organonitrogen compound (GO:0010243)	984	36	20.4	+	1.76	0.0013	0.0482
cell division (GO:0051301)	499	22	10.35	+	2.13	0.00131	0.0484
coagulation (GO:0050817)	172	11	3.57	+	3.08	0.00134	0.0495

## Sheet: Molecular Function 1535
Analysis Type:	PANTHER Overrepresentation Test (Released 20210224)
Annotation Version and Release Date:	GO Ontology database DOI: 10.5281/zenodo.5228828 Released 2021-08-18
Analyzed List:	upload_1 (Homo sapiens)
Reference List:	Homo sapiens (all genes in database)
Test Type:	FISHER
Correction:	FDR
GO molecular function complete	Homo sapiens - REFLIST (20595)	upload_1 (427)	upload_1 (expected)	upload_1 (over/under)	upload_1 (fold Enrichment)	upload_1 (raw P-value)	upload_1 (FDR)
heterocyclic compound binding (GO:1901363)	5945	280	123.26	+	2.27	4.94e-54	2.41e-50
organic cyclic compound binding (GO:0097159)	6025	280	124.92	+	2.24	6.05e-53	1.48e-49
RNA binding (GO:0003723)	1685	146	34.94	+	4.18	2.18e-50	3.55e-47
nucleic acid binding (GO:0003676)	3989	193	82.7	+	2.33	6.08e-33	7.42e-30
structural constituent of cytoskeleton (GO:0005200)	104	35	2.16	+	16.23	1.94e-28	1.9e-25
unfolded protein binding (GO:0051082)	122	36	2.53	+	14.23	1.46e-27	1.19e-24
cadherin binding (GO:0045296)	323	49	6.7	+	7.32	1.2e-25	8.38e-23
binding (GO:0005488)	16519	414	342.49	+	1.21	1.23e-24	6.67e-22
structural molecule activity (GO:0005198)	710	68	14.72	+	4.62	1.19e-24	7.23e-22
nucleoside phosphate binding (GO:1901265)	2175	122	45.09	+	2.71	3.05e-24	1.24e-21
purine nucleotide binding (GO:0017076)	1927	114	39.95	+	2.85	2.56e-24	1.25e-21
nucleotide binding (GO:0000166)	2174	122	45.07	+	2.71	2.93e-24	1.3e-21
cell adhesion molecule binding (GO:0050839)	537	59	11.13	+	5.3	3.7e-24	1.39e-21
purine ribonucleoside triphosphate binding (GO:0035639)	1840	110	38.15	+	2.88	9.59e-24	3.34e-21
small molecule binding (GO:0036094)	2509	130	52.02	+	2.5	5.93e-23	1.7e-20
purine ribonucleotide binding (GO:0032555)	1912	111	39.64	+	2.8	5.33e-23	1.73e-20
cytoskeletal protein binding (GO:0008092)	1003	78	20.8	+	3.75	5.83e-23	1.78e-20
ribonucleotide binding (GO:0032553)	1930	111	40.02	+	2.77	1.09e-22	2.95e-20
carbohydrate derivative binding (GO:0097367)	2275	121	47.17	+	2.57	4.09e-22	1.05e-19
protein binding (GO:0005515)	14349	382	297.5	+	1.28	5.17e-22	1.26e-19
protein-containing complex binding (GO:0044877)	1317	87	27.31	+	3.19	3.41e-21	7.92e-19
anion binding (GO:0043168)	2410	123	49.97	+	2.46	5.97e-21	1.32e-18
protein heterodimerization activity (GO:0046982)	323	43	6.7	+	6.42	1.22e-20	2.6e-18
actin binding (GO:0003779)	453	49	9.39	+	5.22	6.63e-20	1.35e-17
enzyme binding (GO:0019899)	2062	109	42.75	+	2.55	1.45e-19	2.84e-17
nucleoside-triphosphatase activity (GO:0017111)	616	55	12.77	+	4.31	9.85e-19	1.85e-16
actin filament binding (GO:0051015)	220	34	4.56	+	7.45	2.62e-18	4.74e-16
protein folding chaperone (GO:0044183)	40	19	0.83	+	22.91	3.13e-18	5.46e-16
GTP binding (GO:0005525)	381	43	7.9	+	5.44	3.41e-18	5.73e-16
guanyl ribonucleotide binding (GO:0032561)	402	44	8.33	+	5.28	3.88e-18	6.12e-16
guanyl nucleotide binding (GO:0019001)	402	44	8.33	+	5.28	3.88e-18	6.32e-16
pyrophosphatase activity (GO:0016462)	672	56	13.93	+	4.02	8.36e-18	1.27e-15
hydrolase activity, acting on acid anhydrides (GO:0016817)	676	56	14.02	+	4	1.07e-17	1.54e-15
hydrolase activity, acting on acid anhydrides, in phosphorus-containing anhydrides (GO:0016818)	676	56	14.02	+	4	1.07e-17	1.58e-15
protein dimerization activity (GO:0046983)	1040	69	21.56	+	3.2	6.9e-17	9.62e-15
GTPase activity (GO:0003924)	340	36	7.05	+	5.11	1.26e-14	1.71e-12
Unclassified (UNCLASSIFIED)	2345	7	48.62	-	0.14	3.99e-14	5.12e-12
molecular_function (GO:0003674)	18250	420	378.38	+	1.11	3.99e-14	5.26e-12
isomerase activity (GO:0016853)	170	25	3.52	+	7.09	2.38e-13	2.98e-11
adenyl nucleotide binding (GO:0030554)	1573	77	32.61	+	2.36	4.48e-12	5.46e-10
ubiquitin-like protein ligase binding (GO:0044389)	319	31	6.61	+	4.69	7.18e-12	8.34e-10
translation elongation factor activity (GO:0003746)	26	12	0.54	+	22.26	7.11e-12	8.46e-10
adenyl ribonucleotide binding (GO:0032559)	1560	74	32.34	+	2.29	5.42e-11	6.15e-09
ATP binding (GO:0005524)	1495	72	31	+	2.32	7.17e-11	7.95e-09
transmembrane signaling receptor activity (GO:0004888)	1390	2	28.82	-	0.07	1.68e-10	1.83e-08
ubiquitin protein ligase binding (GO:0031625)	300	28	6.22	+	4.5	1.81e-10	1.92e-08
identical protein binding (GO:0042802)	2105	88	43.64	+	2.02	3.61e-10	3.75e-08
signaling receptor activity (GO:0038023)	1612	5	33.42	-	0.15	1.09e-09	1.09e-07
molecular transducer activity (GO:0060089)	1612	5	33.42	-	0.15	1.09e-09	1.11e-07
mRNA binding (GO:0003729)	307	27	6.37	+	4.24	1.28e-09	1.25e-07
heat shock protein binding (GO:0031072)	130	18	2.7	+	6.68	1.33e-09	1.28e-07
disordered domain specific binding (GO:0097718)	37	11	0.77	+	14.34	2.46e-09	2.3e-07
cyclosporin A binding (GO:0016018)	20	9	0.41	+	21.7	3.78e-09	3.48e-07
peptidyl-prolyl cis-trans isomerase activity (GO:0003755)	47	11	0.97	+	11.29	2.06e-08	1.86e-06
ADP binding (GO:0043531)	37	10	0.77	+	13.04	2.85e-08	2.53e-06
DNA-binding transcription factor activity (GO:0003700)	1443	5	29.92	-	0.17	3.31e-08	2.88e-06
cis-trans isomerase activity (GO:0016859)	50	11	1.04	+	10.61	3.58e-08	3.07e-06
protein domain specific binding (GO:0019904)	701	39	14.53	+	2.68	6.12e-08	5.15e-06
DNA-binding transcription factor activity, RNA polymerase II-specific (GO:0000981)	1390	5	28.82	-	0.17	6.56e-08	5.43e-06
G protein-coupled receptor activity (GO:0004930)	882	1	18.29	-	0.05	2.99e-07	2.43e-05
cadherin binding involved in cell-cell adhesion (GO:0098641)	18	7	0.37	+	18.76	4.76e-07	3.81e-05
misfolded protein binding (GO:0051787)	29	8	0.6	+	13.31	6.25e-07	4.92e-05
structural constituent of ribosome (GO:0003735)	169	16	3.5	+	4.57	1.28e-06	9.89e-05
translation factor activity, RNA binding (GO:0008135)	92	12	1.91	+	6.29	1.35e-06	0.000103
ATP-dependent activity (GO:0140657)	511	29	10.59	+	2.74	2.22e-06	0.000166
single-stranded DNA binding (GO:0003697)	125	13	2.59	+	5.02	4.95e-06	0.000366
ribonucleoprotein complex binding (GO:0043021)	151	14	3.13	+	4.47	7.33e-06	0.000534
mRNA 3'-UTR binding (GO:0003730)	92	11	1.91	+	5.77	7.97e-06	0.000572
kinase binding (GO:0019900)	765	36	15.86	+	2.27	8.94e-06	0.000632
structural constituent of muscle (GO:0008307)	44	8	0.91	+	8.77	9.34e-06	0.000651
ATP hydrolysis activity (GO:0016887)	274	19	5.68	+	3.34	9.72e-06	0.000668
translation regulator activity, nucleic acid binding (GO:0090079)	115	12	2.38	+	5.03	1.11e-05	0.00074
allyl-alcohol dehydrogenase activity (GO:0047655)	4	4	0.08	+	48.23	1.1e-05	0.000747
structural constituent of postsynaptic actin cytoskeleton (GO:0098973)	5	4	0.1	+	38.59	1.95e-05	0.00129
catalytic activity (GO:0003824)	5610	157	116.31	+	1.35	2.29e-05	0.00149
structural constituent of postsynapse (GO:0099186)	13	5	0.27	+	18.55	2.33e-05	0.00149
translation regulator activity (GO:0045182)	147	13	3.05	+	4.27	2.46e-05	0.00156
intramolecular oxidoreductase activity (GO:0016860)	52	8	1.08	+	7.42	2.76e-05	0.00172
ion binding (GO:0043167)	6072	167	125.89	+	1.33	2.8e-05	0.00173
protein-disulfide reductase activity (GO:0015035)	38	7	0.79	+	8.88	3.16e-05	0.00193
protein kinase binding (GO:0019901)	682	32	14.14	+	2.26	3.27e-05	0.00197
RNA polymerase II cis-regulatory region sequence-specific DNA binding (GO:0000978)	1203	7	24.94	-	0.28	3.43e-05	0.00202
chaperone binding (GO:0051087)	109	11	2.26	+	4.87	3.41e-05	0.00203
RNA polymerase II transcription regulatory region sequence-specific DNA binding (GO:0000977)	1430	10	29.65	-	0.34	3.97e-05	0.00231
NAD binding (GO:0051287)	57	8	1.18	+	6.77	4.98e-05	0.00282
hydrolase activity (GO:0016787)	2373	78	49.2	+	1.59	4.97e-05	0.00285
cell adhesion mediator activity (GO:0098631)	59	8	1.22	+	6.54	6.21e-05	0.00348
disulfide oxidoreductase activity (GO:0015036)	43	7	0.89	+	7.85	6.38e-05	0.00354
peroxiredoxin activity (GO:0051920)	8	4	0.17	+	24.12	7.3e-05	0.004
tau protein binding (GO:0048156)	45	7	0.93	+	7.5	8.26e-05	0.00448
cis-regulatory region sequence-specific DNA binding (GO:0000987)	1223	8	25.36	-	0.32	9.64e-05	0.00517
oxidoreductase activity, acting on the CH-OH group of donors, NAD or NADP as acceptor (GO:0016616)	126	11	2.61	+	4.21	0.000114	0.00606
DNA polymerase binding (GO:0070182)	20	5	0.41	+	12.06	0.000128	0.00645
intramolecular oxidoreductase activity, transposing S-S bonds (GO:0016864)	20	5	0.41	+	12.06	0.000128	0.00652
structural constituent of synapse (GO:0098918)	20	5	0.41	+	12.06	0.000128	0.00659
cell-cell adhesion mediator activity (GO:0098632)	49	7	1.02	+	6.89	0.000133	0.00665
MHC class I protein binding (GO:0042288)	20	5	0.41	+	12.06	0.000128	0.00666
protein disulfide isomerase activity (GO:0003756)	20	5	0.41	+	12.06	0.000128	0.00673
ribosome binding (GO:0043022)	68	8	1.41	+	5.67	0.000153	0.00754
dATP binding (GO:0032564)	3	3	0.06	+	48.23	0.000159	0.00776
intramolecular transferase activity, phosphotransferases (GO:0016868)	11	4	0.23	+	17.54	0.000192	0.00927
oxidoreductase activity (GO:0016491)	743	32	15.4	+	2.08	0.000212	0.0101
oxidoreductase activity, acting on the aldehyde or oxo group of donors, NAD or NADP as acceptor (GO:0016620)	37	6	0.77	+	7.82	0.000219	0.0102
calcium-dependent protein binding (GO:0048306)	92	9	1.91	+	4.72	0.000217	0.0102
olfactory receptor activity (GO:0004984)	441	0	9.14	-	< 0.01	0.000217	0.0103
oxidoreductase activity, acting on CH-OH group of donors (GO:0016614)	138	11	2.86	+	3.84	0.00024	0.011
alditol:NADP+ 1-oxidoreductase activity (GO:0004032)	12	4	0.25	+	16.08	0.000252	0.0115
double-stranded RNA binding (GO:0003725)	74	8	1.53	+	5.21	0.00026	0.0118
L-malate dehydrogenase activity (GO:0030060)	4	3	0.08	+	36.17	0.000274	0.0118
bisphosphoglycerate mutase activity (GO:0004082)	4	3	0.08	+	36.17	0.000274	0.0119
nucleosomal DNA binding (GO:0031492)	39	6	0.81	+	7.42	0.000282	0.012
adenyl deoxyribonucleotide binding (GO:0032558)	4	3	0.08	+	36.17	0.000274	0.0121
pre-mRNA binding (GO:0036002)	39	6	0.81	+	7.42	0.000282	0.0121
phosphoglycerate mutase activity (GO:0004619)	4	3	0.08	+	36.17	0.000274	0.0122
phosphopyruvate hydratase activity (GO:0004634)	4	3	0.08	+	36.17	0.000274	0.0123
phospholipase inhibitor activity (GO:0004859)	13	4	0.27	+	14.84	0.000324	0.0136
mRNA 5'-UTR binding (GO:0048027)	26	5	0.54	+	9.28	0.000371	0.0155
oxidoreductase activity, acting on a sulfur group of donors (GO:0016667)	59	7	1.22	+	5.72	0.000377	0.0156
S100 protein binding (GO:0044548)	14	4	0.29	+	13.78	0.00041	0.0167
protein tag (GO:0031386)	14	4	0.29	+	13.78	0.00041	0.0168
MHC class II protein complex binding (GO:0023026)	27	5	0.56	+	8.93	0.000433	0.017
purine deoxyribonucleotide binding (GO:0032554)	5	3	0.1	+	28.94	0.000432	0.0171
L-lactate dehydrogenase activity (GO:0004459)	5	3	0.1	+	28.94	0.000432	0.0173
DNA binding (GO:0003677)	2494	77	51.71	+	1.49	0.00043	0.0174
transcription cis-regulatory region binding (GO:0000976)	1526	14	31.64	-	0.44	0.000484	0.0187
transcription regulatory region nucleic acid binding (GO:0001067)	1528	14	31.68	-	0.44	0.000484	0.0189
oxidoreductase activity, acting on the aldehyde or oxo group of donors (GO:0016903)	44	6	0.91	+	6.58	0.000506	0.0194
calcium ion binding (GO:0005509)	730	30	15.14	+	1.98	0.000548	0.0209
amide binding (GO:0033218)	401	20	8.31	+	2.41	0.000584	0.0221
sequence-specific double-stranded DNA binding (GO:1990837)	1582	15	32.8	-	0.46	0.000593	0.0222
phospholipase A2 inhibitor activity (GO:0019834)	6	3	0.12	+	24.12	0.000638	0.0232
thioredoxin peroxidase activity (GO:0008379)	6	3	0.12	+	24.12	0.000638	0.0234
deoxyribonucleotide binding (GO:0032552)	6	3	0.12	+	24.12	0.000638	0.0236
lactate dehydrogenase activity (GO:0004457)	6	3	0.12	+	24.12	0.000638	0.0238
transmembrane transporter binding (GO:0044325)	137	10	2.84	+	3.52	0.000864	0.031
microfilament motor activity (GO:0000146)	32	5	0.66	+	7.54	0.000862	0.0311
D-threo-aldose 1-dehydrogenase activity (GO:0047834)	18	4	0.37	+	10.72	0.000918	0.0325
lipase inhibitor activity (GO:0055102)	18	4	0.37	+	10.72	0.000918	0.0327
nucleosome binding (GO:0031491)	70	7	1.45	+	4.82	0.000961	0.0338
enzyme inhibitor activity (GO:0004857)	73	7	1.51	+	4.62	0.00121	0.042
malate dehydrogenase activity (GO:0016615)	8	3	0.17	+	18.09	0.00122	0.0421
transporter activity (GO:0005215)	1248	11	25.88	-	0.43	0.00131	0.045
MHC protein complex binding (GO:0023023)	36	5	0.75	+	6.7	0.00139	0.0473
integrin binding (GO:0005178)	147	10	3.05	+	3.28	0.00142	0.0483
calmodulin binding (GO:0005516)	201	12	4.17	+	2.88	0.00144	0.0484

## Sheet: Pathway 1535
Analysis Type:	PANTHER Overrepresentation Test (Released 20210224)
Annotation Version and Release Date:	Reactome version 65 Released 2020-11-17
Analyzed List:	upload_1 (Homo sapiens)						458
Reference List:	Homo sapiens (all genes in database)
Test Type:	FISHER
Correction:	FDR
Reactome pathways	Homo sapiens - REFLIST (20595)	upload_1 (427)	upload_1 (expected)	upload_1 (over/under)	upload_1 (fold Enrichment)	upload_1 (raw P-value)	upload_1 (FDR)
Cellular responses to stress (R-HSA-2262752)	547	97	11.34	+	8.55	1.56e-56	1.78e-53
Cellular responses to external stimuli (R-HSA-8953897)	561	98	11.63	+	8.43	1.3e-56	2.96e-53
Infectious disease (R-HSA-5663205)	464	89	9.62	+	9.25	3.41e-54	2.6e-51
RHO GTPase Effectors (R-HSA-195258)	286	70	5.93	+	11.8	1.73e-48	9.87e-46
HCMV Early Events (R-HSA-9609690)	99	47	2.05	+	22.9	1.83e-43	8.34e-41
Signaling by Rho GTPases (R-HSA-194315)	416	74	8.63	+	8.58	7.65e-43	2.91e-40
HCMV Infection (R-HSA-9609646)	123	48	2.55	+	18.82	3.65e-41	1.19e-38
Disease (R-HSA-1643685)	1126	108	23.35	+	4.63	8.15e-40	2.33e-37
Developmental Biology (R-HSA-1266738)	1055	103	21.87	+	4.71	1.79e-38	4.53e-36
RHO GTPases activate PKNs (R-HSA-5625740)	63	38	1.31	+	29.09	2.7e-38	6.17e-36
Metabolism of proteins (R-HSA-392499)	1977	138	40.99	+	3.37	2.6e-37	5.39e-35
Axon guidance (R-HSA-422475)	547	71	11.34	+	6.26	3.74e-33	7.13e-31
M Phase (R-HSA-68886)	352	59	7.3	+	8.08	7.24e-33	1.27e-30
Cell Cycle (R-HSA-1640170)	599	72	12.42	+	5.8	1.07e-31	1.75e-29
Unclassified (UNCLASSIFIED)	9941	92	206.11	-	0.45	1.55e-29	2.36e-27
Cooperation of Prefoldin and TriC/CCT in actin and tubulin folding (R-HSA-389958)	31	26	0.64	+	40.45	3.22e-29	4.6e-27
Cell Cycle, Mitotic (R-HSA-69278)	494	63	10.24	+	6.15	5.1e-29	6.85e-27
RNA Polymerase I Promoter Opening (R-HSA-73728)	32	26	0.66	+	39.19	5.73e-29	7.27e-27
ERCC6 (CSB) and EHMT2 (G9a) positively regulate rRNA expression (R-HSA-427389)	45	28	0.93	+	30.01	9.08e-29	1.09e-26
Formation of tubulin folding intermediates by CCT/TriC (R-HSA-389960)	24	24	0.5	+	48.23	2.63e-28	3.01e-26
PRC2 methylates histones and DNA (R-HSA-212300)	42	27	0.87	+	31.01	4.59e-28	5e-26
Packaging Of Telomere Ends (R-HSA-171306)	33	25	0.68	+	36.54	2.31e-27	2.4e-25
Nucleosome assembly (R-HSA-774815)	54	28	1.12	+	25.01	4.24e-27	3.87e-25
DNA methylation (R-HSA-5334118)	34	25	0.7	+	35.46	3.94e-27	3.91e-25
Deposition of new CENPA-containing nucleosomes at the centromere (R-HSA-606279)	54	28	1.12	+	25.01	4.24e-27	4.03e-25
RUNX1 regulates transcription of genes involved in differentiation of HSCs (R-HSA-8939236)	98	33	2.03	+	16.24	7.03e-27	6.17e-25
Recognition and association of DNA glycosylase with site containing an affected purine (R-HSA-110330)	36	25	0.75	+	33.49	1.1e-26	8.4e-25
Cleavage of the damaged purine (R-HSA-110331)	36	25	0.75	+	33.49	1.1e-26	8.69e-25
Activated PKN1 stimulates transcription of AR (androgen receptor) regulated genes KLK2 and KLK3 (R-HSA-5625886)	36	25	0.75	+	33.49	1.1e-26	9e-25
Depurination (R-HSA-73927)	36	25	0.75	+	33.49	1.1e-26	9.33e-25
SIRT1 negatively regulates rRNA expression (R-HSA-427359)	37	25	0.77	+	32.59	1.81e-26	1.34e-24
HDACs deacetylate histones (R-HSA-3214815)	60	28	1.24	+	22.51	4.1e-26	2.93e-24
DNA Damage/Telomere Stress Induced Senescence (R-HSA-2559586)	61	28	1.26	+	22.14	5.87e-26	4.07e-24
RNA Polymerase I Promoter Clearance (R-HSA-73854)	78	30	1.62	+	18.55	6.41e-26	4.3e-24
Translocation of SLC2A4 (GLUT4) to the plasma membrane (R-HSA-1445148)	70	29	1.45	+	19.98	7.82e-26	5.1e-24
RNA Polymerase I Transcription (R-HSA-73864)	79	30	1.64	+	18.32	8.68e-26	5.51e-24
Recognition and association of DNA glycosylase with site containing an affected pyrimidine (R-HSA-110328)	41	25	0.85	+	29.41	1.2e-25	6.85e-24
HSP90 chaperone cycle for steroid hormone receptors (SHR) (R-HSA-3371497)	55	27	1.14	+	23.68	1.11e-25	6.85e-24
Cleavage of the damaged pyrimidine (R-HSA-110329)	41	25	0.85	+	29.41	1.2e-25	7.02e-24
Depyrimidination (R-HSA-73928)	41	25	0.85	+	29.41	1.2e-25	7.21e-24
Base-Excision Repair, AP Site Formation (R-HSA-73929)	42	25	0.87	+	28.71	1.88e-25	1.02e-23
Condensation of Prophase Chromosomes (R-HSA-2299718)	42	25	0.87	+	28.71	1.88e-25	1.05e-23
Positive epigenetic regulation of rRNA expression (R-HSA-5250913)	73	29	1.51	+	19.16	2.04e-25	1.08e-23
RNA Polymerase I Promoter Escape (R-HSA-73772)	59	27	1.22	+	22.07	4.81e-25	2.5e-23
B-WICH complex positively regulates rRNA expression (R-HSA-5250924)	58	26	1.2	+	21.62	5.58e-24	2.77e-22
Meiotic synapsis (R-HSA-1221632)	58	26	1.2	+	21.62	5.58e-24	2.83e-22
Post-translational protein modification (R-HSA-597592)	1388	94	28.78	+	3.27	1.1e-23	5.35e-22
Prefoldin mediated transfer of substrate to CCT/TriC (R-HSA-389957)	26	21	0.54	+	38.96	1.38e-23	6.54e-22
Recycling pathway of L1 (R-HSA-437239)	46	24	0.95	+	25.16	1.9e-23	8.87e-22
Chromosome Maintenance (R-HSA-73886)	90	29	1.87	+	15.54	2.6e-23	1.19e-21
Telomere Maintenance (R-HSA-157579)	63	26	1.31	+	19.91	3e-23	1.35e-21
Oxidative Stress Induced Senescence (R-HSA-2559580)	92	29	1.91	+	15.2	4.34e-23	1.91e-21
Meiotic recombination (R-HSA-912446)	56	25	1.16	+	21.53	4.54e-23	1.96e-21
Transcriptional regulation of granulopoiesis (R-HSA-9616222)	58	25	1.2	+	20.79	9.01e-23	3.81e-21
The role of GTSE1 in G2/M progression after G2 checkpoint (R-HSA-8852276)	76	27	1.58	+	17.13	1.05e-22	4.38e-21
RHO GTPases activate IQGAPs (R-HSA-5626467)	30	21	0.62	+	33.76	1.16e-22	4.75e-21
Formation of the beta-catenin:TCF transactivating complex (R-HSA-201722)	60	25	1.24	+	20.1	1.75e-22	7.02e-21
HCMV Late Events (R-HSA-9610379)	79	27	1.64	+	16.48	2.43e-22	9.58e-21
Base Excision Repair (R-HSA-73884)	70	26	1.45	+	17.91	2.62e-22	1.02e-20
Senescence-Associated Secretory Phenotype (SASP) (R-HSA-2559582)	80	27	1.66	+	16.28	3.19e-22	1.22e-20
Pre-NOTCH Transcription and Translation (R-HSA-1912408)	62	25	1.29	+	19.45	3.34e-22	1.25e-20
TCF dependent signaling in response to WNT (R-HSA-201681)	201	37	4.17	+	8.88	4.13e-22	1.52e-20
Transcriptional regulation by small RNAs (R-HSA-5578749)	73	26	1.51	+	17.18	6.25e-22	2.27e-20
Epigenetic regulation of gene expression (R-HSA-212165)	115	30	2.38	+	12.58	7.6e-22	2.71e-20
NoRC negatively regulates rRNA expression (R-HSA-427413)	74	26	1.53	+	16.95	8.3e-22	2.91e-20
RUNX1 regulates genes involved in megakaryocyte differentiation and platelet function (R-HSA-8936459)	66	25	1.37	+	18.27	1.15e-21	3.98e-20
Negative epigenetic regulation of rRNA expression (R-HSA-5250941)	77	26	1.6	+	16.29	1.9e-21	6.47e-20
Activation of HOX genes during differentiation (R-HSA-5619507)	91	27	1.89	+	14.31	5.26e-21	1.74e-19
Activation of anterior HOX genes in hindbrain development during early embryogenesis (R-HSA-5617472)	91	27	1.89	+	14.31	5.26e-21	1.77e-19
Cellular Senescence (R-HSA-2559583)	163	33	3.38	+	9.76	5.97e-21	1.95e-19
G2/M Checkpoints (R-HSA-69481)	150	32	3.11	+	10.29	6.06e-21	1.95e-19
Chaperonin-mediated protein folding (R-HSA-390466)	93	27	1.93	+	14	8.46e-21	2.68e-19
G2/M Transition (R-HSA-69275)	193	35	4	+	8.75	8.69e-21	2.72e-19
Mitotic Prophase (R-HSA-68875)	104	28	2.16	+	12.99	8.83e-21	2.73e-19
Mitotic G2-G2/M phases (R-HSA-453274)	195	35	4.04	+	8.66	1.17e-20	3.55e-19
L1CAM interactions (R-HSA-373760)	117	29	2.43	+	11.95	1.24e-20	3.73e-19
Meiosis (R-HSA-1500620)	86	26	1.78	+	14.58	1.92e-20	5.69e-19
HATs acetylate histones (R-HSA-3214847)	108	28	2.24	+	12.5	2.09e-20	6.11e-19
Aggrephagy (R-HSA-9646399)	42	21	0.87	+	24.12	2.25e-20	6.49e-19
Signaling by WNT (R-HSA-195721)	297	41	6.16	+	6.66	3.06e-20	8.74e-19
Pre-NOTCH Expression and Processing (R-HSA-1912422)	78	25	1.62	+	15.46	3.24e-20	9.13e-19
Protein folding (R-HSA-391251)	99	27	2.05	+	13.15	3.33e-20	9.27e-19
Microtubule-dependent trafficking of connexons from Golgi to the plasma membrane (R-HSA-190840)	18	17	0.37	+	45.55	4.04e-20	1.11e-18
Transport of connexons to the plasma membrane (R-HSA-190872)	19	17	0.39	+	43.15	7.5e-20	2.04e-18
Gene Silencing by RNA (R-HSA-211000)	103	27	2.14	+	12.64	7.94e-20	2.13e-18
Activation of AMPK downstream of NMDARs (R-HSA-9619483)	26	18	0.54	+	33.39	1.54e-19	4.09e-18
Estrogen-dependent gene expression (R-HSA-9018519)	118	28	2.45	+	11.44	1.57e-19	4.13e-18
Signaling by NOTCH (R-HSA-157118)	200	34	4.15	+	8.2	1.9e-19	4.92e-18
Deubiquitination (R-HSA-5688426)	281	39	5.83	+	6.69	2.25e-19	5.77e-18
Ub-specific processing proteases (R-HSA-5689880)	204	34	4.23	+	8.04	3.28e-19	8.32e-18
G2/M DNA damage checkpoint (R-HSA-69473)	78	24	1.62	+	14.84	4.09e-19	1.03e-17
Amyloid fiber formation (R-HSA-977225)	79	24	1.64	+	14.65	5.23e-19	1.3e-17
COPI-independent Golgi-to-ER retrograde traffic (R-HSA-6811436)	51	21	1.06	+	19.86	5.31e-19	1.31e-17
Immune System (R-HSA-168256)	2158	110	44.74	+	2.46	1.81e-18	4.4e-17
Gap junction trafficking (R-HSA-190828)	47	20	0.97	+	20.52	2.22e-18	5.33e-17
Transcriptional regulation by RUNX1 (R-HSA-8878171)	204	33	4.23	+	7.8	2.48e-18	5.9e-17
Gap junction trafficking and regulation (R-HSA-157858)	48	20	1	+	20.1	3.08e-18	7.26e-17
Organelle biogenesis and maintenance (R-HSA-1852241)	291	38	6.03	+	6.3	4.24e-18	9.77e-17
Metabolism of RNA (R-HSA-8953854)	661	56	13.7	+	4.09	4.2e-18	9.78e-17
Reproduction (R-HSA-1474165)	112	26	2.32	+	11.2	5.08e-18	1.16e-16
ESR-mediated signaling (R-HSA-8939211)	187	31	3.88	+	8	1.47e-17	3.33e-16
Cell Cycle Checkpoints (R-HSA-69620)	270	36	5.6	+	6.43	1.83e-17	4.06e-16
Selective autophagy (R-HSA-9663891)	73	22	1.51	+	14.54	1.82e-17	4.06e-16
Chromatin organization (R-HSA-4839726)	240	34	4.98	+	6.83	2.85e-17	6.19e-16
Chromatin modifying enzymes (R-HSA-3247509)	240	34	4.98	+	6.83	2.85e-17	6.25e-16
Assembly and cell surface presentation of NMDA receptors (R-HSA-9609736)	41	18	0.85	+	21.17	7.32e-17	1.58e-15
Recruitment of NuMA to mitotic centrosomes (R-HSA-380320)	92	23	1.91	+	12.06	1.09e-16	2.32e-15
Post-chaperonin tubulin folding pathway (R-HSA-389977)	21	15	0.44	+	34.45	1.22e-16	2.58e-15
Eukaryotic Translation Elongation (R-HSA-156842)	94	23	1.95	+	11.8	1.63e-16	3.41e-15
Gap junction assembly (R-HSA-190861)	36	17	0.75	+	22.78	2.06e-16	4.27e-15
Cilium Assembly (R-HSA-5617833)	199	30	4.13	+	7.27	4.97e-16	1.02e-14
COPI-mediated anterograde transport (R-HSA-6807878)	100	23	2.07	+	11.09	5.19e-16	1.06e-14
Separation of Sister Chromatids (R-HSA-2467813)	184	29	3.81	+	7.6	5.48e-16	1.11e-14
Smooth Muscle Contraction (R-HSA-445355)	39	17	0.81	+	21.02	5.9e-16	1.18e-14
Carboxyterminal post-translational modifications of tubulin (R-HSA-8955332)	41	17	0.85	+	20	1.15e-15	2.27e-14
Neutrophil degranulation (R-HSA-6798695)	478	44	9.91	+	4.44	1.36e-15	2.69e-14
Mitotic Anaphase (R-HSA-68882)	192	29	3.98	+	7.29	1.48e-15	2.9e-14
Mitotic Metaphase and Anaphase (R-HSA-2555396)	193	29	4	+	7.25	1.67e-15	3.24e-14
RHO GTPases Activate Formins (R-HSA-5663220)	134	25	2.78	+	9	1.93e-15	3.7e-14
UCH proteinases (R-HSA-5689603)	95	22	1.97	+	11.17	2e-15	3.81e-14
Signal Transduction (R-HSA-162582)	2728	118	56.56	+	2.09	9.17e-15	1.73e-13
Signaling by Nuclear Receptors (R-HSA-9006931)	261	32	5.41	+	5.91	1.01e-14	1.88e-13
RMTs methylate histone arginines (R-HSA-3214858)	49	17	1.02	+	16.73	1.26e-14	2.33e-13
Gluconeogenesis (R-HSA-70263)	33	15	0.68	+	21.92	1.92e-14	3.54e-13
DNA Repair (R-HSA-73894)	309	34	6.41	+	5.31	2.57e-14	4.69e-13
Nonhomologous End-Joining (NHEJ) (R-HSA-5693571)	52	17	1.08	+	15.77	2.82e-14	5.11e-13
Innate Immune System (R-HSA-168249)	1105	66	22.91	+	2.88	4.17e-14	7.49e-13
Post NMDA receptor activation events (R-HSA-438064)	75	19	1.55	+	12.22	4.21e-14	7.51e-13
Activation of NMDA receptors and postsynaptic events (R-HSA-442755)	87	20	1.8	+	11.09	4.34e-14	7.69e-13
Autophagy (R-HSA-9612973)	143	24	2.96	+	8.09	5.6e-14	9.84e-13
Recruitment and ATM-mediated phosphorylation of repair and signaling proteins at DNA double strand breaks (R-HSA-5693565)	59	17	1.22	+	13.9	1.59e-13	2.76e-12
Kinesins (R-HSA-983189)	60	17	1.24	+	13.67	2e-13	3.43e-12
DNA Double Strand Break Response (R-HSA-5693606)	60	17	1.24	+	13.67	2e-13	3.46e-12
EML4 and NUDC in mitotic spindle formation (R-HSA-9648025)	113	21	2.34	+	8.96	3.79e-13	6.46e-12
Macroautophagy (R-HSA-1632852)	128	22	2.65	+	8.29	4.18e-13	7.01e-12
Hemostasis (R-HSA-109582)	669	48	13.87	+	3.46	4.16e-13	7.04e-12
Membrane Trafficking (R-HSA-199991)	624	46	12.94	+	3.56	5.5e-13	9.17e-12
Mitotic Prometaphase (R-HSA-68877)	197	26	4.08	+	6.37	7.44e-13	1.23e-11
Resolution of Sister Chromatid Cohesion (R-HSA-2500257)	121	21	2.51	+	8.37	1.22e-12	2e-11
Processing of DNA double-strand break ends (R-HSA-5693607)	81	18	1.68	+	10.72	1.35e-12	2.2e-11
Regulation of expression of SLITs and ROBOs (R-HSA-9010553)	169	24	3.5	+	6.85	1.42e-12	2.3e-11
ER to Golgi Anterograde Transport (R-HSA-199977)	153	23	3.17	+	7.25	1.46e-12	2.36e-11
Folding of actin by CCT/TriC (R-HSA-390450)	10	10	0.21	+	48.23	1.66e-12	2.65e-11
Apoptosis (R-HSA-109581)	171	24	3.55	+	6.77	1.78e-12	2.82e-11
Vesicle-mediated transport (R-HSA-5653656)	725	49	15.03	+	3.26	1.82e-12	2.87e-11
MHC class II antigen presentation (R-HSA-2132295)	124	21	2.57	+	8.17	1.85e-12	2.89e-11
Factors involved in megakaryocyte development and platelet production (R-HSA-983231)	156	23	3.23	+	7.11	2.1e-12	3.26e-11
Programmed Cell Death (R-HSA-5357801)	174	24	3.61	+	6.65	2.48e-12	3.83e-11
Glucose metabolism (R-HSA-70326)	86	18	1.78	+	10.1	3.25e-12	4.98e-11
RNA Polymerase II Transcription (R-HSA-73857)	1318	69	27.33	+	2.53	3.92e-12	5.97e-11
Signaling by ROBO receptors (R-HSA-376176)	215	26	4.46	+	5.83	4.51e-12	6.82e-11
Peptide chain elongation (R-HSA-156902)	89	18	1.85	+	9.75	5.37e-12	8.07e-11
Golgi-to-ER retrograde transport (R-HSA-8856688)	133	21	2.76	+	7.62	6.07e-12	9.06e-11
Glycolysis (R-HSA-70171)	67	16	1.39	+	11.52	9.46e-12	1.4e-10
Interleukin-12 signaling (R-HSA-9020591)	46	14	0.95	+	14.68	1.22e-11	1.8e-10
Gene and protein expression by JAK-STAT signaling after Interleukin-12 stimulation (R-HSA-8950505)	37	13	0.77	+	16.95	1.5e-11	2.2e-10
Hedgehog 'off' state (R-HSA-5610787)	110	19	2.28	+	8.33	1.57e-11	2.28e-10
Influenza Life Cycle (R-HSA-168255)	141	21	2.92	+	7.18	1.63e-11	2.36e-10
Gene expression (Transcription) (R-HSA-74160)	1451	72	30.08	+	2.39	1.79e-11	2.57e-10
HDR through Homologous Recombination (HRR) or Single Strand Annealing (SSA) (R-HSA-5693567)	114	19	2.36	+	8.04	2.72e-11	3.88e-10
Signaling by Hedgehog (R-HSA-5358351)	146	21	3.03	+	6.94	2.93e-11	4.16e-10
Cytokine Signaling in Immune system (R-HSA-1280215)	823	50	17.06	+	2.93	4.03e-11	5.67e-10
Transport to the Golgi and subsequent modification (R-HSA-948021)	184	23	3.81	+	6.03	4.33e-11	6.07e-10
Metabolism of amino acids and derivatives (R-HSA-71291)	367	32	7.61	+	4.21	4.44e-11	6.19e-10
Influenza Infection (R-HSA-168254)	152	21	3.15	+	6.66	5.77e-11	7.99e-10
Homology Directed Repair (R-HSA-5693538)	120	19	2.49	+	7.64	5.98e-11	8.22e-10
E3 ubiquitin ligases ubiquitinate target proteins (R-HSA-8866654)	54	14	1.12	+	12.5	7.48e-11	1.02e-09
Signaling by Interleukins (R-HSA-449147)	447	35	9.27	+	3.78	8.38e-11	1.14e-09
Selenocysteine synthesis (R-HSA-2408557)	93	17	1.93	+	8.82	8.51e-11	1.15e-09
Interleukin-12 family signaling (R-HSA-447115)	56	14	1.16	+	12.06	1.13e-10	1.52e-09
Platelet degranulation (R-HSA-114608)	127	19	2.63	+	7.22	1.42e-10	1.9e-09
mRNA Splicing - Major Pathway (R-HSA-72163)	180	22	3.73	+	5.9	1.7e-10	2.26e-09
COPI-dependent Golgi-to-ER retrograde traffic (R-HSA-6811434)	99	17	2.05	+	8.28	2.02e-10	2.66e-09
Nonsense Mediated Decay (NMD) enhanced by the Exon Junction Complex (EJC) (R-HSA-975957)	115	18	2.38	+	7.55	2.27e-10	2.96e-09
Nonsense-Mediated Decay (NMD) (R-HSA-927802)	115	18	2.38	+	7.55	2.27e-10	2.98e-09
Selenoamino acid metabolism (R-HSA-2408522)	116	18	2.41	+	7.48	2.57e-10	3.32e-09
Response to elevated platelet cytosolic Ca2+ (R-HSA-76005)	132	19	2.74	+	6.94	2.57e-10	3.33e-09
Generic Transcription Pathway (R-HSA-212436)	1196	61	24.8	+	2.46	2.97e-10	3.81e-09
Protein ubiquitination (R-HSA-8852135)	74	15	1.53	+	9.78	3.14e-10	4e-09
mRNA Splicing (R-HSA-72172)	188	22	3.9	+	5.64	3.62e-10	4.59e-09
Viral mRNA Translation (R-HSA-192823)	89	16	1.85	+	8.67	3.81e-10	4.81e-09
Translation (R-HSA-72766)	293	27	6.07	+	4.44	4.99e-10	6.26e-09
Metalloprotease DUBs (R-HSA-5689901)	31	11	0.64	+	17.11	5.19e-10	6.48e-09
RAF/MAP kinase cascade (R-HSA-5673001)	232	24	4.81	+	4.99	5.64e-10	7e-09
Eukaryotic Translation Termination (R-HSA-72764)	93	16	1.93	+	8.3	6.74e-10	8.32e-09
MAPK family signaling cascades (R-HSA-5683057)	276	26	5.72	+	4.54	6.83e-10	8.38e-09
MAPK1/MAPK3 signaling (R-HSA-5684996)	237	24	4.91	+	4.88	8.36e-10	1.02e-08
Nonsense Mediated Decay (NMD) independent of the Exon Junction Complex (EJC) (R-HSA-975956)	95	16	1.97	+	8.12	8.88e-10	1.08e-08
Metabolism (R-HSA-1430728)	2079	86	43.1	+	2	9.16e-10	1.11e-08
Intra-Golgi and retrograde Golgi-to-ER traffic (R-HSA-6811442)	201	22	4.17	+	5.28	1.14e-09	1.37e-08
DNA Double-Strand Break Repair (R-HSA-5693532)	148	19	3.07	+	6.19	1.45e-09	1.74e-08
Influenza Viral RNA Transcription and Replication (R-HSA-168273)	132	18	2.74	+	6.58	1.66e-09	1.98e-08
Response of EIF2AK4 (GCN2) to amino acid deficiency (R-HSA-9633012)	101	16	2.09	+	7.64	1.96e-09	2.31e-08
Formation of a pool of free 40S subunits (R-HSA-72689)	101	16	2.09	+	7.64	1.96e-09	2.32e-08
FLT3 Signaling (R-HSA-9607240)	250	24	5.18	+	4.63	2.22e-09	2.6e-08
Cap-dependent Translation Initiation (R-HSA-72737)	119	17	2.47	+	6.89	2.51e-09	2.91e-08
Eukaryotic Translation Initiation (R-HSA-72613)	119	17	2.47	+	6.89	2.51e-09	2.93e-08
Cellular response to heat stress (R-HSA-3371556)	88	15	1.82	+	8.22	2.59e-09	2.99e-08
Adaptive Immune System (R-HSA-1280218)	819	46	16.98	+	2.71	2.77e-09	3.18e-08
EPH-Ephrin signaling (R-HSA-2682334)	91	15	1.89	+	7.95	3.89e-09	4.44e-08
Asparagine N-linked glycosylation (R-HSA-446203)	303	26	6.28	+	4.14	4.2e-09	4.77e-08
Processing of Capped Intron-Containing Pre-mRNA (R-HSA-72203)	238	23	4.93	+	4.66	4.29e-09	4.85e-08
Semaphorin interactions (R-HSA-373755)	64	13	1.33	+	9.8	4.72e-09	5.31e-08
RHO GTPases activate PAKs (R-HSA-5627123)	21	9	0.44	+	20.67	5.31e-09	5.94e-08
L13a-mediated translational silencing of Ceruloplasmin expression (R-HSA-156827)	111	16	2.3	+	6.95	6.61e-09	7.37e-08
SRP-dependent cotranslational protein targeting to membrane (R-HSA-1799339)	112	16	2.32	+	6.89	7.42e-09	8.18e-08
GTP hydrolysis and joining of the 60S ribosomal subunit (R-HSA-72706)	112	16	2.32	+	6.89	7.42e-09	8.22e-08
Neurotransmitter receptors and postsynaptic signal transmission (R-HSA-112314)	195	20	4.04	+	4.95	1.79e-08	1.96e-07
Activation of the mRNA upon binding of the cap-binding complex and eIFs, and subsequent binding to 43S (R-HSA-72662)	59	12	1.22	+	9.81	1.83e-08	2e-07
Metabolism of carbohydrates (R-HSA-71387)	286	24	5.93	+	4.05	2.49e-08	2.7e-07
Association of TriC/CCT with target proteins during biosynthesis (R-HSA-390471)	38	10	0.79	+	12.69	3.53e-08	3.82e-07
Formation of the ternary complex, and subsequently, the 43S complex (R-HSA-72695)	51	11	1.06	+	10.4	4.28e-08	4.61e-07
Muscle contraction (R-HSA-397014)	208	20	4.31	+	4.64	4.79e-08	5.14e-07
Intraflagellar transport (R-HSA-5620924)	52	11	1.08	+	10.2	5.09e-08	5.43e-07
Platelet activation, signaling and aggregation (R-HSA-76002)	259	22	5.37	+	4.1	7.85e-08	8.34e-07
Chk1/Chk2(Cds1) mediated inactivation of Cyclin B:Cdk1 complex (R-HSA-75035)	13	7	0.27	+	25.97	8.38e-08	8.86e-07
Regulation of mRNA stability by proteins that bind AU-rich elements (R-HSA-450531)	85	13	1.76	+	7.38	9.39e-08	9.88e-07
Translation initiation complex formation (R-HSA-72649)	58	11	1.2	+	9.15	1.35e-07	1.41e-06
Ribosomal scanning and start codon recognition (R-HSA-72702)	58	11	1.2	+	9.15	1.35e-07	1.42e-06
Activation of BAD and translocation to mitochondria (R-HSA-111447)	15	7	0.31	+	22.51	1.78e-07	1.85e-06
Downstream signaling events of B Cell Receptor (BCR) (R-HSA-1168372)	79	12	1.64	+	7.33	3.13e-07	3.24e-06
Transmission across Chemical Synapses (R-HSA-112315)	260	21	5.39	+	3.9	3.38e-07	3.47e-06
TP53 Regulates Metabolic Genes (R-HSA-5628897)	83	12	1.72	+	6.97	5.05e-07	5.17e-06
Regulation of HSF1-mediated heat shock response (R-HSA-3371453)	68	11	1.41	+	7.8	5.58e-07	5.69e-06
RHO GTPases Activate ROCKs (R-HSA-5627117)	19	7	0.39	+	17.77	6.4e-07	6.5e-06
Major pathway of rRNA processing in the nucleolus and cytosol (R-HSA-6791226)	182	17	3.77	+	4.51	7.09e-07	7.17e-06
Cooperation of PDCL (PhLP1) and TRiC/CCT in G-protein beta folding (R-HSA-6814122)	42	9	0.87	+	10.34	7.73e-07	7.78e-06
Signaling downstream of RAS mutants (R-HSA-9649948)	45	9	0.93	+	9.65	1.28e-06	1.27e-05
Signaling by moderate kinase activity BRAF mutants (R-HSA-6802946)	45	9	0.93	+	9.65	1.28e-06	1.27e-05
Signaling by RAS mutants (R-HSA-6802949)	45	9	0.93	+	9.65	1.28e-06	1.28e-05
Paradoxical activation of RAF signaling by kinase inactive BRAF (R-HSA-6802955)	45	9	0.93	+	9.65	1.28e-06	1.28e-05
rRNA processing in the nucleus and cytosol (R-HSA-8868773)	192	17	3.98	+	4.27	1.4e-06	1.38e-05
Apoptosis induced DNA fragmentation (R-HSA-140342)	13	6	0.27	+	22.26	1.47e-06	1.44e-05
Attenuation phase (R-HSA-3371568)	14	6	0.29	+	20.67	2.06e-06	2.02e-05
Signaling by high-kinase activity BRAF mutants (R-HSA-6802948)	35	8	0.73	+	11.02	2.11e-06	2.05e-05
Hedgehog ligand biogenesis (R-HSA-5358346)	64	10	1.33	+	7.54	2.42e-06	2.35e-05
rRNA processing (R-HSA-72312)	202	17	4.19	+	4.06	2.66e-06	2.57e-05
Intrinsic Pathway for Apoptosis (R-HSA-109606)	50	9	1.04	+	8.68	2.77e-06	2.66e-05
Degradation of beta-catenin by the destruction complex (R-HSA-195253)	82	11	1.7	+	6.47	2.92e-06	2.79e-05
Loss of Nlp from mitotic centrosomes (R-HSA-380259)	68	10	1.41	+	7.09	3.95e-06	3.74e-05
Loss of proteins required for interphase microtubule organization from the centrosome (R-HSA-380284)	68	10	1.41	+	7.09	3.95e-06	3.76e-05
AUF1 (hnRNP D0) binds and destabilizes mRNA (R-HSA-450408)	53	9	1.1	+	8.19	4.23e-06	4e-05
MAP2K and MAPK activation (R-HSA-5674135)	39	8	0.81	+	9.89	4.26e-06	4.01e-05
Diseases of signal transduction (R-HSA-5663202)	366	23	7.59	+	3.03	5.36e-06	5.01e-05
Hh mutants that don't undergo autocatalytic processing are degraded by ERAD (R-HSA-5362768)	55	9	1.14	+	7.89	5.54e-06	5.17e-05
AURKA Activation by TPX2 (R-HSA-8854518)	71	10	1.47	+	6.79	5.59e-06	5.19e-05
Activation of BH3-only proteins (R-HSA-114452)	29	7	0.6	+	11.64	6.81e-06	6.3e-05
G1/S Transition (R-HSA-69206)	130	13	2.7	+	4.82	7.33e-06	6.75e-05
Hh mutants abrogate ligand secretion (R-HSA-5387390)	58	9	1.2	+	7.48	8.16e-06	7.45e-05
CDT1 association with the CDC6:ORC:origin complex (R-HSA-68827)	58	9	1.2	+	7.48	8.16e-06	7.48e-05
RHO GTPases activate CIT (R-HSA-5625900)	19	6	0.39	+	15.23	8.65e-06	7.88e-05
Defective CFTR causes cystic fibrosis (R-HSA-5678895)	60	9	1.24	+	7.23	1.04e-05	9.46e-05
Sema4D induced cell migration and growth-cone collapse (R-HSA-416572)	20	6	0.41	+	14.47	1.11e-05	9.98e-05
CLEC7A (Dectin-1) signaling (R-HSA-5607764)	96	11	1.99	+	5.53	1.15e-05	0.000103
Anchoring of the basal body to the plasma membrane (R-HSA-5620912)	96	11	1.99	+	5.53	1.15e-05	0.000104
Transcriptional Regulation by TP53 (R-HSA-3700989)	360	22	7.46	+	2.95	1.29e-05	0.000115
G alpha (s) signalling events (R-HSA-418555)	575	0	11.92	-	< 0.01	1.38e-05	0.000123
Recruitment of mitotic centrosome proteins and complexes (R-HSA-380270)	80	10	1.66	+	6.03	1.45e-05	0.000128
Centrosome maturation (R-HSA-380287)	80	10	1.66	+	6.03	1.45e-05	0.000128
Interleukin-1 signaling (R-HSA-9020702)	100	11	2.07	+	5.31	1.64e-05	0.000144
Signaling by BRAF and RAF fusions (R-HSA-6802952)	64	9	1.33	+	6.78	1.66e-05	0.000146
Regulation of localization of FOXO transcription factors (R-HSA-9614399)	12	5	0.25	+	20.1	1.71e-05	0.000148
HSF1 activation (R-HSA-3371511)	12	5	0.25	+	20.1	1.71e-05	0.000149
Regulation of activated PAK-2p34 by proteasome mediated degradation (R-HSA-211733)	49	8	1.02	+	7.87	1.88e-05	0.000162
Cross-presentation of soluble exogenous antigens (endosomes) (R-HSA-1236978)	49	8	1.02	+	7.87	1.88e-05	0.000162
RHO GTPases Activate WASPs and WAVEs (R-HSA-5663213)	35	7	0.73	+	9.65	1.98e-05	0.00017
Activation of NF-kappaB in B cells (R-HSA-1169091)	66	9	1.37	+	6.58	2.08e-05	0.000178
Regulation of ornithine decarboxylase (ODC) (R-HSA-350562)	50	8	1.04	+	7.72	2.14e-05	0.000182
Response of Mtb to phagocytosis (R-HSA-9637690)	23	6	0.48	+	12.58	2.17e-05	0.000183
BBSome-mediated cargo-targeting to cilium (R-HSA-5620922)	23	6	0.48	+	12.58	2.17e-05	0.000184
Host Interactions of HIV factors (R-HSA-162909)	124	12	2.57	+	4.67	2.22e-05	0.000187
Assembly of the pre-replicative complex (R-HSA-68867)	67	9	1.39	+	6.48	2.31e-05	0.000194
Regulation of PLK1 Activity at G2/M Transition (R-HSA-2565942)	85	10	1.76	+	5.67	2.33e-05	0.000195
Ubiquitin-dependent degradation of Cyclin D (R-HSA-75815)	51	8	1.06	+	7.57	2.43e-05	0.000199
Autodegradation of the E3 ubiquitin ligase COP1 (R-HSA-349425)	51	8	1.06	+	7.57	2.43e-05	0.0002
Vpu mediated degradation of CD4 (R-HSA-180534)	51	8	1.06	+	7.57	2.43e-05	0.0002
Mitotic G1 phase and G1/S transition (R-HSA-453279)	147	13	3.05	+	4.27	2.46e-05	0.000201
Ubiquitin Mediated Degradation of Phosphorylated Cdc25A (R-HSA-69601)	51	8	1.06	+	7.57	2.43e-05	0.000201
p53-Independent DNA Damage Response (R-HSA-69610)	51	8	1.06	+	7.57	2.43e-05	0.000202
p53-Independent G1/S DNA damage checkpoint (R-HSA-69613)	51	8	1.06	+	7.57	2.43e-05	0.000203
HSF1-dependent transactivation (R-HSA-3371571)	24	6	0.5	+	12.06	2.66e-05	0.000216
Sema4D in semaphorin signaling (R-HSA-400685)	24	6	0.5	+	12.06	2.66e-05	0.000216
Negative regulation of NOTCH4 signaling (R-HSA-9604323)	52	8	1.08	+	7.42	2.76e-05	0.000221
Vif-mediated degradation of APOBEC3G (R-HSA-180585)	52	8	1.08	+	7.42	2.76e-05	0.000222
Regulation of Apoptosis (R-HSA-169911)	52	8	1.08	+	7.42	2.76e-05	0.000222
MAPK6/MAPK4 signaling (R-HSA-5687128)	88	10	1.82	+	5.48	3.07e-05	0.000245
Orc1 removal from chromatin (R-HSA-68949)	70	9	1.45	+	6.2	3.17e-05	0.000252
Degradation of AXIN (R-HSA-4641257)	54	8	1.12	+	7.15	3.51e-05	0.000276
SCF-beta-TrCP mediated degradation of Emi1 (R-HSA-174113)	54	8	1.12	+	7.15	3.51e-05	0.000277
FBXL7 down-regulates AURKA during mitotic entry and in early mitosis (R-HSA-8854050)	54	8	1.12	+	7.15	3.51e-05	0.000278
APC/C:Cdh1 mediated degradation of Cdc20 and other APC/C:Cdh1 targeted proteins in late mitosis/early G1 (R-HSA-174178)	71	9	1.47	+	6.11	3.51e-05	0.000278
Oncogenic MAPK signaling (R-HSA-6802957)	72	9	1.49	+	6.03	3.88e-05	0.000303
Stabilization of p53 (R-HSA-69541)	55	8	1.14	+	7.02	3.95e-05	0.000308
PCP/CE pathway (R-HSA-4086400)	91	10	1.89	+	5.3	3.99e-05	0.00031
Degradation of DVL (R-HSA-4641258)	56	8	1.16	+	6.89	4.44e-05	0.000344
Infection with Mycobacterium tuberculosis (R-HSA-9635486)	27	6	0.56	+	10.72	4.72e-05	0.000364
EPHB-mediated forward signaling (R-HSA-3928662)	41	7	0.85	+	8.23	4.87e-05	0.000375
Metabolism of polyamines (R-HSA-351202)	57	8	1.18	+	6.77	4.98e-05	0.000381
NIK-->noncanonical NF-kB signaling (R-HSA-5676590)	58	8	1.2	+	6.65	5.56e-05	0.000425
EPHA-mediated growth cone collapse (R-HSA-3928663)	28	6	0.58	+	10.34	5.63e-05	0.000429
ABC transporter disorders (R-HSA-5619084)	76	9	1.58	+	5.71	5.7e-05	0.000432
Degradation of GLI1 by the proteasome (R-HSA-5610780)	59	8	1.22	+	6.54	6.21e-05	0.000465
Degradation of GLI2 by the proteasome (R-HSA-5610783)	59	8	1.22	+	6.54	6.21e-05	0.000466
Neuronal System (R-HSA-112316)	402	22	8.33	+	2.64	6.25e-05	0.000467
GLI3 is processed to GLI3R by the proteasome (R-HSA-5610785)	59	8	1.22	+	6.54	6.21e-05	0.000468
Dectin-1 mediated noncanonical NF-kB signaling (R-HSA-5607761)	59	8	1.22	+	6.54	6.21e-05	0.000469
Protein methylation (R-HSA-8876725)	17	5	0.35	+	14.19	6.69e-05	0.000497
Signaling by NOTCH4 (R-HSA-9013694)	80	9	1.66	+	5.43	8.19e-05	0.000607
Cell-extracellular matrix interactions (R-HSA-446353)	18	5	0.37	+	13.4	8.4e-05	0.000621
Asymmetric localization of PCP proteins (R-HSA-4608870)	63	8	1.31	+	6.12	9.43e-05	0.000695
Downstream TCR signaling (R-HSA-202424)	102	10	2.11	+	4.73	9.63e-05	0.000707
p53-Dependent G1 DNA Damage Response (R-HSA-69563)	64	8	1.33	+	6.03	0.000104	0.000761
p53-Dependent G1/S DNA damage checkpoint (R-HSA-69580)	64	8	1.33	+	6.03	0.000104	0.000763
ER-Phagosome pathway (R-HSA-1236974)	83	9	1.72	+	5.23	0.000106	0.000772
Regulation of actin dynamics for phagocytic cup formation (R-HSA-2029482)	125	11	2.59	+	4.24	0.000107	0.000776
DNA Replication Pre-Initiation (R-HSA-69002)	84	9	1.74	+	5.17	0.000115	0.000831
Oxygen-dependent proline hydroxylation of Hypoxia-inducible Factor Alpha (R-HSA-1234176)	65	8	1.35	+	5.94	0.000115	0.000831
RNA Polymerase II Transcription Termination (R-HSA-73856)	66	8	1.37	+	5.85	0.000127	0.000896
Regulation of mitotic cell cycle (R-HSA-453276)	85	9	1.76	+	5.11	0.000125	0.000897
Regulation of RAS by GAPs (R-HSA-5658442)	66	8	1.37	+	5.85	0.000127	0.000899
APC/C-mediated degradation of cell cycle proteins (R-HSA-174143)	85	9	1.76	+	5.11	0.000125	0.0009
APC/C:Cdc20 mediated degradation of Securin (R-HSA-174154)	66	8	1.37	+	5.85	0.000127	0.000902
G1/S DNA Damage Checkpoints (R-HSA-69615)	66	8	1.37	+	5.85	0.000127	0.000905
Regulation of PTEN stability and activity (R-HSA-8948751)	68	8	1.41	+	5.67	0.000153	0.00108
Apoptotic execution phase (R-HSA-75153)	51	7	1.06	+	6.62	0.000167	0.00117
Detoxification of Reactive Oxygen Species (R-HSA-3299685)	35	6	0.73	+	8.27	0.000167	0.00117
Switching of origins to a post-replicative state (R-HSA-69052)	89	9	1.85	+	4.88	0.000173	0.00121
SUMO E3 ligases SUMOylate target proteins (R-HSA-3108232)	157	12	3.26	+	3.69	0.000182	0.00127
Regulation of RUNX2 expression and activity (R-HSA-8939902)	70	8	1.45	+	5.51	0.000184	0.00128
Chaperone Mediated Autophagy (R-HSA-9613829)	22	5	0.46	+	10.96	0.000189	0.0013
Striated Muscle Contraction (R-HSA-390522)	36	6	0.75	+	8.04	0.000191	0.00132
Cdc20:Phospho-APC/C mediated degradation of Cyclin A (R-HSA-174184)	71	8	1.47	+	5.43	0.000201	0.00138
CDK-mediated phosphorylation and removal of Cdc6 (R-HSA-69017)	71	8	1.47	+	5.43	0.000201	0.00138
Regulation of RUNX3 expression and activity (R-HSA-8941858)	53	7	1.1	+	6.37	0.000207	0.00142
Olfactory Signaling Pathway (R-HSA-381753)	432	0	8.96	-	< 0.01	0.000211	0.00144
APC:Cdc20 mediated degradation of cell cycle proteins prior to satisfation of the cell cycle checkpoint (R-HSA-179419)	72	8	1.49	+	5.36	0.000219	0.00149
PTEN Regulation (R-HSA-6807070)	137	11	2.84	+	3.87	0.000226	0.00153
Interleukin-1 family signaling (R-HSA-446652)	137	11	2.84	+	3.87	0.000226	0.00153
Pyruvate metabolism and Citric Acid (TCA) cycle (R-HSA-71406)	54	7	1.12	+	6.25	0.00023	0.00155
C-type lectin receptors (CLRs) (R-HSA-5621481)	138	11	2.86	+	3.84	0.00024	0.00161
SUMOylation (R-HSA-2990846)	163	12	3.38	+	3.55	0.000252	0.00169
Cellular response to hypoxia (R-HSA-1234174)	74	8	1.53	+	5.21	0.00026	0.00173
APC/C:Cdc20 mediated degradation of mitotic proteins (R-HSA-176409)	74	8	1.53	+	5.21	0.00026	0.00174
Activation of APC/C and APC/C:Cdc20 mediated degradation of mitotic proteins (R-HSA-176814)	75	8	1.55	+	5.14	0.000283	0.00187
Negative regulation of MAPK pathway (R-HSA-5675221)	39	6	0.81	+	7.42	0.000282	0.00188
Synthesis of DNA (R-HSA-69239)	118	10	2.45	+	4.09	0.00029	0.00191
Beta-catenin independent WNT signaling (R-HSA-3858494)	142	11	2.94	+	3.74	0.000302	0.00199
mRNA 3'-end processing (R-HSA-72187)	57	7	1.18	+	5.92	0.000311	0.00204
ERKs are inactivated (R-HSA-202670)	13	4	0.27	+	14.84	0.000324	0.00211
Advanced glycosylation endproduct receptor signaling (R-HSA-879415)	13	4	0.27	+	14.84	0.000324	0.00212
Antigen processing-Cross presentation (R-HSA-1236975)	99	9	2.05	+	4.38	0.000359	0.00234
SCF(Skp2)-mediated degradation of p27/p21 (R-HSA-187577)	59	7	1.22	+	5.72	0.000377	0.00244
Signaling by the B Cell Receptor (BCR) (R-HSA-983705)	171	12	3.55	+	3.38	0.000379	0.00245
Regulation of APC/C activators between G1/S and early anaphase (R-HSA-176408)	79	8	1.64	+	4.88	0.000391	0.00252
SUMOylation of transcription cofactors (R-HSA-3899300)	42	6	0.87	+	6.89	0.000404	0.0026
Spry regulation of FGF signaling (R-HSA-1295596)	14	4	0.29	+	13.78	0.00041	0.00263
TCR signaling (R-HSA-202403)	124	10	2.57	+	3.89	0.000418	0.00268
ABC-family proteins mediated transport (R-HSA-382556)	102	9	2.11	+	4.26	0.00044	0.0028
Fcgamma receptor (FCGR) dependent phagocytosis (R-HSA-2029480)	149	11	3.09	+	3.56	0.000442	0.0028
HIV Infection (R-HSA-162906)	227	14	4.71	+	2.97	0.00044	0.00281
DNA Replication (R-HSA-69306)	126	10	2.61	+	3.83	0.000471	0.00298
Cyclin E associated events during G1/S transition (R-HSA-69202)	82	8	1.7	+	4.71	0.000492	0.0031
Autodegradation of Cdh1 by Cdh1:APC/C (R-HSA-174084)	62	7	1.29	+	5.45	0.000495	0.00312
Hedgehog 'on' state (R-HSA-5632684)	84	8	1.74	+	4.59	0.00057	0.00357
Cyclin A:Cdk2-associated events at S phase entry (R-HSA-69656)	84	8	1.74	+	4.59	0.00057	0.00358
RAF activation (R-HSA-5673000)	29	5	0.6	+	8.32	0.000578	0.00361
Uptake and function of diphtheria toxin (R-HSA-5336415)	6	3	0.12	+	24.12	0.000638	0.00397
Signaling by FGFR2 (R-HSA-5654738)	65	7	1.35	+	5.19	0.000642	0.00399
Interaction between L1 and Ankyrins (R-HSA-445095)	31	5	0.64	+	7.78	0.000758	0.00469
S Phase (R-HSA-69242)	160	11	3.32	+	3.32	0.000771	0.00476
Signaling by GPCR (R-HSA-372790)	1212	10	25.13	-	0.4	0.000778	0.00479
Fc epsilon receptor (FCERI) signaling (R-HSA-2454202)	189	12	3.92	+	3.06	0.000873	0.00536
PP2A-mediated dephosphorylation of key metabolic factors (R-HSA-163767)	7	3	0.15	+	20.67	0.000898	0.00548
Suppression of apoptosis (R-HSA-9635465)	7	3	0.15	+	20.67	0.000898	0.0055
Mitochondrial biogenesis (R-HSA-1592230)	92	8	1.91	+	4.19	0.000991	0.00602
Toll Like Receptor 3 (TLR3) Cascade (R-HSA-168164)	92	8	1.91	+	4.19	0.000991	0.00603
PIP3 activates AKT signaling (R-HSA-1257604)	248	14	5.14	+	2.72	0.000997	0.00604
Cargo trafficking to the periciliary membrane (R-HSA-5620920)	51	6	1.06	+	5.67	0.00103	0.0062
Transport of Mature mRNA derived from an Intron-Containing Transcript (R-HSA-159236)	71	7	1.47	+	4.76	0.00104	0.00626
Transcriptional regulation by RUNX2 (R-HSA-8878166)	117	9	2.43	+	3.71	0.0011	0.00661
FCERI mediated NF-kB activation (R-HSA-2871837)	143	10	2.96	+	3.37	0.00117	0.00703
Transcriptional activation of mitochondrial biogenesis (R-HSA-2151201)	53	6	1.1	+	5.46	0.00123	0.00736
MyD88-independent TLR4 cascade (R-HSA-166166)	96	8	1.99	+	4.02	0.00128	0.0076
TRIF(TICAM1)-mediated TLR4 signaling (R-HSA-937061)	96	8	1.99	+	4.02	0.00128	0.00762
GPCR ligand binding (R-HSA-500792)	462	1	9.58	-	0.1	0.00129	0.00763
Intracellular signaling by second messengers (R-HSA-9006925)	287	15	5.95	+	2.52	0.00139	0.00823
The citric acid (TCA) cycle and respiratory electron transport (R-HSA-1428517)	173	11	3.59	+	3.07	0.0014	0.00826
Signaling by FGFR (R-HSA-190236)	76	7	1.58	+	4.44	0.0015	0.00881
TNFR2 non-canonical NF-kB pathway (R-HSA-5668541)	99	8	2.05	+	3.9	0.00154	0.00901
Calcineurin activates NFAT (R-HSA-2025928)	9	3	0.19	+	16.08	0.0016	0.00935
ERK/MAPK targets (R-HSA-198753)	22	4	0.46	+	8.77	0.00176	0.0103
Transport of Mature Transcript to Cytoplasm (R-HSA-72202)	80	7	1.66	+	4.22	0.00197	0.0115
Negative regulation of FGFR3 signaling (R-HSA-5654732)	23	4	0.48	+	8.39	0.00203	0.0118
Nephrin family interactions (R-HSA-373753)	23	4	0.48	+	8.39	0.00203	0.0118
MASTL Facilitates Mitotic Progression (R-HSA-2465910)	10	3	0.21	+	14.47	0.00205	0.0118
DARPP-32 events (R-HSA-180024)	24	4	0.5	+	8.04	0.00234	0.0135
vRNP Assembly (R-HSA-192905)	2	2	0.04	+	48.23	0.0024	0.0138
Manipulation of host energy metabolism (R-HSA-9636667)	2	2	0.04	+	48.23	0.0024	0.0138
GPCR downstream signalling (R-HSA-388396)	1143	10	23.7	-	0.42	0.00242	0.0139
Global Genome Nucleotide Excision Repair (GG-NER) (R-HSA-5696399)	84	7	1.74	+	4.02	0.00254	0.0144
Toll Like Receptor 10 (TLR10) Cascade (R-HSA-168142)	84	7	1.74	+	4.02	0.00254	0.0144
Toll Like Receptor 5 (TLR5) Cascade (R-HSA-168176)	84	7	1.74	+	4.02	0.00254	0.0145
Formation of annular gap junctions (R-HSA-196025)	11	3	0.23	+	13.15	0.00256	0.0145
MyD88 cascade initiated on plasma membrane (R-HSA-975871)	84	7	1.74	+	4.02	0.00254	0.0145
Uptake and actions of bacterial toxins (R-HSA-5339562)	25	4	0.52	+	7.72	0.00267	0.015
Nuclear Events (kinase and transcription factor activation) (R-HSA-198725)	25	4	0.52	+	7.72	0.00267	0.015
MAP kinase activation (R-HSA-450294)	63	6	1.31	+	4.59	0.00276	0.0155
Formation of Incision Complex in GG-NER (R-HSA-5696395)	43	5	0.89	+	5.61	0.00282	0.0158
Nucleotide Excision Repair (R-HSA-5696398)	110	8	2.28	+	3.51	0.00284	0.0159
Negative regulation of FGFR1 signaling (R-HSA-5654726)	26	4	0.54	+	7.42	0.00303	0.0169
Regulation of glycolysis by fructose 2,6-bisphosphate metabolism (R-HSA-9634600)	12	3	0.25	+	12.06	0.00316	0.0175
Gap junction degradation (R-HSA-190873)	12	3	0.25	+	12.06	0.00316	0.0175
FOXO-mediated transcription (R-HSA-9614085)	65	6	1.35	+	4.45	0.00319	0.0177
Negative regulation of FGFR4 signaling (R-HSA-5654733)	27	4	0.56	+	7.15	0.00342	0.0189
TRAF6 mediated induction of NFkB and MAP kinases upon TLR7/8 or 9 activation (R-HSA-975138)	90	7	1.87	+	3.75	0.00364	0.02
MyD88 dependent cascade initiated on endosome (R-HSA-975155)	91	7	1.89	+	3.71	0.00385	0.0209
Toll Like Receptor 7/8 (TLR7/8) Cascade (R-HSA-168181)	91	7	1.89	+	3.71	0.00385	0.021
Inhibition of replication initiation of damaged DNA by RB1/E2F1 (R-HSA-113501)	13	3	0.27	+	11.13	0.00383	0.021
Negative regulation of FGFR2 signaling (R-HSA-5654727)	28	4	0.58	+	6.89	0.00385	0.021
Interconversion of nucleotide di- and triphosphates (R-HSA-499943)	28	4	0.58	+	6.89	0.00385	0.0211
Transcriptional regulation by RUNX3 (R-HSA-8878159)	93	7	1.93	+	3.63	0.0043	0.0234
AXIN missense mutants destabilize the destruction complex (R-HSA-5467340)	14	3	0.29	+	10.34	0.00458	0.0244
Truncations of AMER1 destabilize the destruction complex (R-HSA-5467348)	14	3	0.29	+	10.34	0.00458	0.0244
AXIN mutants destabilize the destruction complex, activating WNT signaling (R-HSA-4839735)	14	3	0.29	+	10.34	0.00458	0.0245
truncated APC mutants destabilize the destruction complex (R-HSA-4839744)	14	3	0.29	+	10.34	0.00458	0.0245
Toll Like Receptor TLR6:TLR2 Cascade (R-HSA-168188)	94	7	1.95	+	3.59	0.00455	0.0245
AMER1 mutants destabilize the destruction complex (R-HSA-4839748)	14	3	0.29	+	10.34	0.00458	0.0246
MyD88:MAL(TIRAP) cascade initiated on plasma membrane (R-HSA-166058)	94	7	1.95	+	3.59	0.00455	0.0246
APC truncation mutants have impaired AXIN binding (R-HSA-5467337)	14	3	0.29	+	10.34	0.00458	0.0247
Interleukin-17 signaling (R-HSA-448424)	71	6	1.47	+	4.08	0.00478	0.0254
Pyruvate metabolism (R-HSA-70268)	30	4	0.62	+	6.43	0.00481	0.0254
Toll Like Receptor 9 (TLR9) Cascade (R-HSA-168138)	95	7	1.97	+	3.55	0.0048	0.0254
Misspliced GSK3beta mutants stabilize beta-catenin (R-HSA-5339716)	15	3	0.31	+	9.65	0.00541	0.028
The NLRP3 inflammasome (R-HSA-844456)	15	3	0.31	+	9.65	0.00541	0.028
MAPK targets/ Nuclear events mediated by MAP kinases (R-HSA-450282)	31	4	0.64	+	6.22	0.00534	0.028
Toll Like Receptor 2 (TLR2) Cascade (R-HSA-181438)	97	7	2.01	+	3.48	0.00533	0.0281
phosphorylation site mutants of CTNNB1 are not targeted to the proteasome by the destruction complex (R-HSA-4839743)	15	3	0.31	+	9.65	0.00541	0.0281
Toll Like Receptor TLR1:TLR2 Cascade (R-HSA-168179)	97	7	2.01	+	3.48	0.00533	0.0281
S33 mutants of beta-catenin aren't phosphorylated (R-HSA-5358747)	15	3	0.31	+	9.65	0.00541	0.0282
S37 mutants of beta-catenin aren't phosphorylated (R-HSA-5358749)	15	3	0.31	+	9.65	0.00541	0.0282
S45 mutants of beta-catenin aren't phosphorylated (R-HSA-5358751)	15	3	0.31	+	9.65	0.00541	0.0283
T41 mutants of beta-catenin aren't phosphorylated (R-HSA-5358752)	15	3	0.31	+	9.65	0.00541	0.0284
Toll-like Receptor Cascades (R-HSA-168898)	152	9	3.15	+	2.86	0.00575	0.0296
Hypusine synthesis from eIF5A-lysine (R-HSA-204626)	4	2	0.08	+	24.12	0.00585	0.0301
Signaling by FGFR3 (R-HSA-5654741)	32	4	0.66	+	6.03	0.00591	0.0304
mRNA Splicing - Minor Pathway (R-HSA-72165)	52	5	1.08	+	4.64	0.00595	0.0305
Toll Like Receptor 4 (TLR4) Cascade (R-HSA-166016)	126	8	2.61	+	3.06	0.00613	0.0313
Formation of Senescence-Associated Heterochromatin Foci (SAHF) (R-HSA-2559584)	16	3	0.33	+	9.04	0.00633	0.0321
Sema3A PAK dependent Axon repulsion (R-HSA-399954)	16	3	0.33	+	9.04	0.00633	0.0322
CRMPs in Sema3A signaling (R-HSA-399956)	16	3	0.33	+	9.04	0.00633	0.0323
Cell-Cell communication (R-HSA-1500931)	127	8	2.63	+	3.04	0.0064	0.0324
Signaling by NTRK1 (TRKA) (R-HSA-187037)	77	6	1.6	+	3.76	0.00687	0.0347
Platelet sensitization by LDL (R-HSA-432142)	17	3	0.35	+	8.51	0.00734	0.0369
Beta-catenin phosphorylation cascade (R-HSA-196299)	17	3	0.35	+	8.51	0.00734	0.037
Signaling by FGFR4 (R-HSA-5654743)	35	4	0.73	+	5.51	0.00788	0.0395
SUMO is conjugated to E1 (UBA2:SAE1) (R-HSA-3065676)	5	2	0.1	+	19.29	0.00808	0.0404
TFAP2A acts as a transcriptional repressor during retinoic acid induced cell differentiation (R-HSA-8869496)	5	2	0.1	+	19.29	0.00808	0.0405
Post-translational protein phosphorylation (R-HSA-8957275)	107	7	2.22	+	3.16	0.00871	0.0434
